# Supplementary material for: Asymmetric α-alkylation of aldehydes with 3-hydroxy-3-indolylox-indoles in aqueous media
Source: Royal Society of Chemistry journal article supplement (doi:10.1039/c3ob00045a), 2013-01-01
Supplement: c3ob00045a.pdf [file c3ob00045a.pdf]

Electronic Supplementary Material (ESI) for Organic & Biomolecular Chemistry  
This journal is © The Royal Society of Chemistry 2012

## Supporting Information

### **Asymmetric $\alpha$ -Alkylation of Aldehydes with 3-Hydroxy-3-Indolylox-Indoles in Aqueous Media**

Ying Zhang, Shun-Yi Wang\*, Xiao-Ping Xu, Ran Jiang, Shun-Jun Ji\*

*Key Laboratory of Organic Synthesis of Jiangsu Province, College of Chemistry,  
Chemical Engineering and Materials Science, Soochow University, Suzhou 215123,  
China.*

*Fax : (+86)-512-65880307; Tel: (+86)-512-65880307;*

*E-mail: shunjun@suda.edu.cn; shunyi@suda.edu.cn*

Electronic Supplementary Material (ESI) for Organic & Biomolecular Chemistry  
This journal is © The Royal Society of Chemistry 2012

## Table of Contents

|                                                                        |            |
|------------------------------------------------------------------------|------------|
| General Methods                                                        | S3         |
| Enantioselective $\alpha$ -alkylation of aldehydes                     | S4         |
| Description of products                                                | S5         |
| Determination of the absolute configuration of the alkylation products | S15        |
| Copy of NMR spectra of products                                        | S16        |
| Copy of HPLC traces of products                                        | <b>S35</b> |

Electronic Supplementary Material (ESI) for Organic & Biomolecular Chemistry  
This journal is © The Royal Society of Chemistry 2012

**General Methods.** The aldehydes **2a-d** were purchased from commercial suppliers and used without further purification.  $^1\text{H}$  NMR and  $^{13}\text{C}$  NMR spectra were recorded on a Varian INOVA 300 or 400 MHz ( $^1\text{H}$  NMR) and 75 or 100 MHz ( $^{13}\text{C}$  NMR) spectrometer using  $\text{CDCl}_3$  or  $\text{DMSO-}d_6$  as solvent. Chemical shifts ( $\delta$  ppm) were relative to the resonance of the deuterated solvent as the internal standard. High resolution mass spectra were obtained using GCT-TOF instrument with EI or ESI source. High performance liquid chromatography (HPLC) was performed on an Agilent 1200 Series chromatographs using a Chiralcel AD-H column (0.46cm x 25cm), Chiralcel OD-H column (0.46cm x 25cm) and HPLC grade isopropanol and *n*-hexane were used as the eluting solvents. Chromatographic purification was done with 300-400 mesh silica gel. Materials: All the reactions were carried out in undistilled solvent without any precautions to exclude water. The 3-hydroxy-3-indolylox-indoles **1a-h**<sup>1</sup> were prepared according to the literature procedure. The imidazolidinones **A-I**<sup>2</sup> were prepared according to the reported procedure.

---

<sup>1</sup> S.-Y. Wang and S.-J. Ji, *Tetrahedron*, 2006, **62**, 1527.

<sup>2</sup> (a) K. A. Ahrendt, C. J. Borths and D. W. C. MacMillan, *J. Am. Chem. Soc.*, 2000, **122**, 4243; (b) T. J. Peelen, Y. Chi and S. H. Gellman, *J. Am. Chem. Soc.*, 2005, **127**, 11598.

Electronic Supplementary Material (ESI) for Organic & Biomolecular Chemistry  
This journal is © The Royal Society of Chemistry 2012

### Enantioselective $\alpha$ -alkylation of aldehydes:

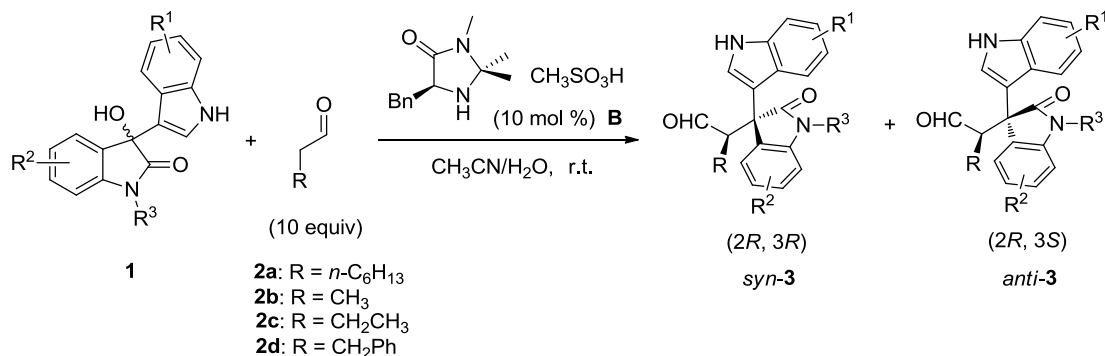

**General procedure:** In an ordinary test tube equipped with a magnetic stirring bar, the alcohol **1** (0.5 mmol, 1 equiv.) and aldehyde **2** (5 mmol, 10 equiv.) were dissolved in  $\text{CH}_3\text{CN}/\text{H}_2\text{O}$  solvent mixture at room temperature. After stirring for 1 min, chiral imidazolidinone catalyst **B** (0.05 mmol, 10 mol %) was added. The mixture was vigorously stirred at room temperature, until alcohol **1** was completely consumed as indicated by TLC analysis. After dilution with  $\text{Et}_2\text{O}$ , the organic layer was separated and the aqueous layer was extracted twice with  $\text{Et}_2\text{O}$ . The combined organic layers were washed with brine, dried over  $\text{Na}_2\text{SO}_4$  and concentrated *in vacuo*. The desired product **3** (diastereomer mixture) was obtained after purification by flash column chromatography using petroleum ether /ethyl acetate as the eluent.

Electronic Supplementary Material (ESI) for Organic & Biomolecular Chemistry  
This journal is © The Royal Society of Chemistry 2012

### Description of products:

#### 2-(3-(1*H*-indol-3-yl)-2-oxoindolin-3-yl)octanal(3aa)

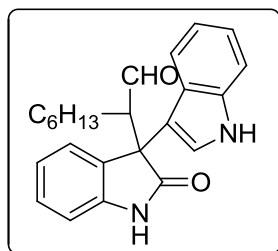

*dr* = 70:30 ratio (*syn*-**3aa**/*anti*-**3aa**) was determined by integration of  $\underline{\text{CH}}\text{CHO}$   $^1\text{H}$  NMR signal. *Syn* diastereomer *ee* = 85%; *Anti* diastereomer *ee* = >99%. The *ee* was determined by HPLC analysis Daicel Chiralcel OD-H column: hexane/*i*-PrOH 75:25, flow rate 1 mL/min, 30°C,  $\lambda$  = 210 nm: *Syn* diastereomer  $t_{\text{major}}$  = 16.306 min,  $t_{\text{minor}}$  = 5.354 min. *Anti* diastereomer  $t_{\text{major}}$  = 6.411 min.  $^1\text{H}$  NMR (400 MHz, DMSO- $d_6$ , mixture of two diastereomers):  $\delta$  = 0.75-0.85 (m, 12H), 1.15-1.22 (m, 14H), 3.46-3.48 (m, 1H), 3.63-3.66 (m, 1H), 6.83-7.03 (m, 9H), 7.16-7.27 (m, 5H), 7.29-7.35 (m, 3H), 7.43-7.45 (m, 1H), 9.71 (d,  $J$  = 2.5 Hz, 1H, diast.), 9.80 (d,  $J$  = 2.8 Hz, 1H, diast.), 10.64 (s, 1H, diast.), 10.78 (s, 1H, diast.), 11.10 (s, 2H);  $^{13}\text{C}$  NMR (75 MHz, DMSO- $d_6$ , mixture of two diastereomers):  $\delta$  = 203.49, 203.11, 178.53, 177.74, 142.37, 141.82, 136.96, 136.80, 131.67, 130.02, 128.60, 128.23, 125.72(2C), 124.99, 124.84, 124.54, 124.38, 121.78, 121.62, 121.27(2C), 120.50, 119.87, 118.68(2C), 112.46, 111.75(2C), 111.55, 109.87, 109.61, 55.02, 54.34, 53.98, 53.84, 30.95, 30.82, 28.51, 28.28, 27.15, 27.02, 24.73, 24.02, 21.92(2C), 13.86(2C); HRMS (ESI): found:  $m/z$  = 373.1935, calcd. for  $[\text{C}_{24}\text{H}_{25}\text{N}_2\text{O}_2]$ : 373.1922.

#### 2-(3-(5-methyl-1*H*-indol-3-yl)-2-oxoindolin-3-yl)octanal(3ba)

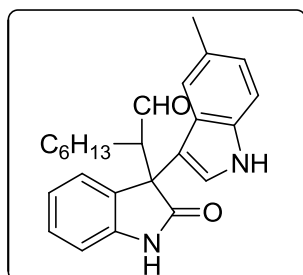

*dr* = 62:38 ratio (*syn*-**3ba**/*anti*-**3ba**) was determined by integration of  $\underline{\text{CH}}\text{CHO}$   $^1\text{H}$  NMR signal. *Syn* diastereomer *ee* = 71%; *Anti* diastereomer *ee* = 78%. The *ee* was determined by HPLC analysis Daicel Chiralcel AD-H column: hexane/*i*-PrOH 75:25, flow rate 1 mL/min, 30°C,  $\lambda$  = 254 nm: *Syn* diastereomer  $t_{\text{major}}$  = 8.997 min,  $t_{\text{minor}}$  = 5.715 min. *Anti* diastereomer  $t_{\text{major}}$  = 7.181 min,  $t_{\text{minor}}$  = 7.550 min.  $^1\text{H}$  NMR (400 MHz, DMSO- $d_6$ , mixture of two diastereomers):  $\delta$  = 0.75-0.84 (m, 6H), 1.06-1.16 (m, 20H), 2.25 (s, 3H), 2.29 (s, 3H), 3.47 (d,  $J$  = 10.6 Hz, 1H), 3.65 (d,  $J$  = 9.4 Hz, 1H), 6.87-7.07 (m, 9H), 7.21-7.31 (m, 7H), 9.69 (s, 1H, diast.), 9.77 (s, 1H, diast.), 10.61 (s, 1H, diast.), 10.76 (s, 1H, diast.), 10.95-10.96 (m, 2H);  $^{13}\text{C}$  NMR (75 MHz, DMSO- $d_6$ ):  $\delta$  = 203.55, 203.16, 178.56, 177.74, 142.32, 141.80, 135.36, 135.19, 131.71, 130.07, 128.52, 128.20, 127.00, 126.88, 125.68, 125.21, 125.05, 124.48, 124.39(2C), 122.89(2C), 121.74, 121.56, 120.24, 119.52, 111.90, 111.47, 111.45, 111.00,

Electronic Supplementary Material (ESI) for Organic & Biomolecular Chemistry  
This journal is © The Royal Society of Chemistry 2012

109.80, 109.56, 54.90, 54.21, 53.98, 53.82, 30.92, 30.81, 28.51, 28.24, 27.10, 27.00, 24.75, 23.99, 22.04, 21.91, 21.45, 21.35, 13.84(2C); **HRMS** (ESI): found:  $m/z = 387.2087$ , calcd. for  $[\text{C}_{25}\text{H}_{27}\text{N}_2\text{O}_2]^+$ : 387.2078.

**2-(3-(5-methoxy-1H-indol-3-yl)-2-oxoindolin-3-yl)octanal(3ca)**

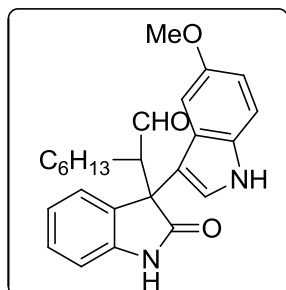

$dr = 50:50$  ratio (*syn*-**3ca**/*anti*-**3ca**) was determined by integration of  $\text{CHCHO}$   $^1\text{H}$  NMR signal. *Syn* diastereomer  $ee = 65\%$ ; *Anti* diastereomer  $ee = 90\%$ . The  $ee$  was determined by HPLC analysis Daicel Chiralcel AD-H column: hexane/*i*-PrOH 75:25, flow rate 1 mL/min, 30°C,  $\lambda = 254$  nm: *Syn* diastereomer  $t_{\text{major}} = 11.951$  min,  $t_{\text{minor}} = 6.956$  min. *Anti* diastereomer  $t_{\text{major}} = 9.914$  min,  $t_{\text{minor}} = 9.565$  min.  $^1\text{H}$  NMR (400 MHz, DMSO- $d_6$ , mixture of two diastereomers):  $\delta = 0.77\text{-}0.83$  (m, 6H), 1.07-1.23 (m, 20H), 3.46 (s, 1H), 3.53-3.55 (m, 3H), 3.63-3.64 (m, 4H), 6.47 (s, 1H), 6.70-6.82 (m, 3H), 6.94-7.11 (m, 6H), 7.23-7.31 (m, 6H), 9.69 (s, 1H, diast.), 9.84 (s, 1H, diast.), 10.64 (s, 1H, diast.), 10.76 (s, 1H, diast.), 10.96 (s, 2H);  $^{13}\text{C}$  NMR (75 MHz, DMSO- $d_6$ ):  $\delta = 203.59, 203.15, 178.52, 177.73, 152.88, 152.75, 142.54, 141.94, 132.00(2\text{C}), 131.45, 130.00, 128.62, 128.28, 125.92, 125.31, 125.28, 125.23, 125.04, 124.59, 121.77, 121.64, 112.29, 112.23, 111.93, 110.99(3\text{C}), 109.81, 109.57, 102.42, 102.25, 55.21, 54.97, 54.86, 54.11, 53.91, 53.78, 30.95, 30.84, 28.48, 28.29, 27.18, 26.96, 24.69, 24.03, 21.94, 21.90, 13.85(2\text{C})$ . **HRMS** (ESI): found:  $m/z = 403.2053$ , calcd. for  $[\text{C}_{25}\text{H}_{27}\text{N}_2\text{O}_3]^+$ : 403.2027.

**2-(3-(5-bromo-1H-indol-3-yl)-2-oxoindolin-3-yl)octanal(3da)**

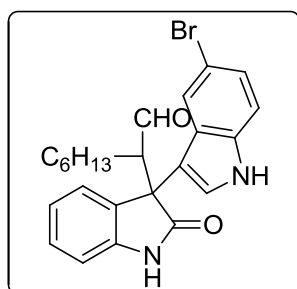

$dr = 62:38$  ratio (*syn*-**3da**/*anti*-**3da**) was determined by integration of  $\text{CHCHO}$   $^1\text{H}$  NMR signal. *Syn* diastereomer  $ee = 67\%$ ; *Anti* diastereomer  $ee = 67\%$ . The  $ee$  was determined by HPLC analysis Daicel Chiralcel AD-H column: hexane/*i*-PrOH 75:25, flow rate 1 mL/min, 30°C,  $\lambda = 254$  nm: *Syn* diastereomer  $t_{\text{major}} = 14.040$  min,  $t_{\text{minor}} = 5.111$  min. *Anti* diastereomer  $t_{\text{major}} = 6.237$  min,  $t_{\text{minor}} = 9.417$  min.  $^1\text{H}$  NMR (400 MHz, DMSO- $d_6$ , mixture of two diastereomers):  $\delta = 0.74\text{-}0.84$  (m, 6H), 1.06-1.23 (m, 20H), 3.47 (d,  $J = 10.8$  Hz, 1H), 3.60 (d,

Electronic Supplementary Material (ESI) for Organic & Biomolecular Chemistry  
This journal is © The Royal Society of Chemistry 2012

$J = 10.0$  Hz, 1H), 6.93-7.00 (m, 3H), 7.03-7.10 (m, 3H), 7.15-7.19 (m, 2H), 7.22-7.23 (m, 1H), 7.26-7.28 (m, 2H), 7.32-7.36 (m, 3H), 7.41 (s, 1H), 7.61 (s, 1H), 9.65 (d,  $J = 2.7$  Hz, 1H, diast.), 9.78 (d,  $J = 3.2$  Hz, 1H, diast.), 10.71(s, 1H, diast.), 10.83 (s, 1H, diast.), 11.34-11.36 (m, 2H);  $^{13}\text{C NMR}$  (75 MHz,  $\text{DMSO-}d_6$ ):  $\delta = 203.35, 202.93, 178.34, 177.56, 142.31, 141.79, 135.69, 135.53, 130.97, 129.46, 128.81, 128.48, 126.64, 126.52, 126.18(2\text{C}), 125.84(2\text{C}), 124.64, 123.85, 122.85, 122.18, 121.89, 121.76, 113.81, 112.09, 111.47, 111.43(2\text{C}), 111.28, 110.00, 109.76, 55.00, 54.36, 53.84, 53.64, 30.91, 30.78, 28.48, 28.17, 27.09, 26.94, 24.77, 23.88, 21.91(2\text{C}), 13.86(2\text{C})$ ; **HRMS** (ESI): found:  $m/z = 451.1057$ , calcd. for  $[\text{C}_{24}\text{H}_{24}\text{BrN}_2\text{O}_2]^+$ : 451.1027.

**2-(3-(7-methyl-1H-indol-3-yl)-2-oxoindolin-3-yl)octanal(3ea)**

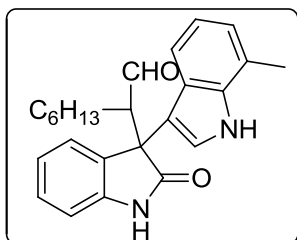

$dr = 34:66$  ratio (*syn*-**3ea**/*anti*-**3ea**) was determined by integration of  $\text{CHCHO}$   $^1\text{H NMR}$  signal. *Syn* diastereomer  $ee = 83\%$ ; *Anti* diastereomer  $ee = 82\%$ . The  $ee$  was determined by HPLC analysis Daicel Chiralcel AD-H column: hexane/*i*-PrOH 75:25, flow rate 1 mL/min,  $30^\circ\text{C}$ ,  $\lambda = 254$  nm: *Syn* diastereomer  $t_{\text{major}} = 7.910$  min,  $t_{\text{minor}} = 9.588$  min. *Anti* diastereomer  $t_{\text{major}} = 16.220$  min,  $t_{\text{minor}} = 9.045$  min.  $^1\text{H NMR}$  (400 MHz,  $\text{DMSO-}d_6$ , mixture of two diastereomers):  $\delta = 0.76-0.83$  (m, 6H), 1.07-1.23 (m, 20H), 2.41 (s, 6H), 3.47 (d,  $J = 10.1$  Hz, 1H), 3.64 (d,  $J = 9.8$  Hz, 1H), 6.73-6.84 (m, 4H), 6.91-7.03 (m, 7H), 7.16-7.32 (m, 5H), 9.74 (d,  $J = 2.4$  Hz, 1H, diast.), 9.81 (d,  $J = 2.6$  Hz, 1H, diast.), 10.63 (s, 1H, diast.), 10.77 (s, 1H, diast.), 11.06 (s, 2H);  $^{13}\text{C NMR}$  (75 MHz,  $\text{DMSO-}d_6$ ):  $\delta = 203.43, 177.73, 142.36, 136.34, 130.13, 128.60, 128.20, 125.69, 124.69, 124.22, 121.73, 120.74, 118.89, 117.98, 112.05, 109.83, 54.31, 53.94, 30.95, 28.51, 27.01, 24.68, 21.92, 16.70, 13.88$ ; **HRMS** (ESI): found:  $m/z = 387.2084$ , calcd. for  $[\text{C}_{25}\text{H}_{27}\text{N}_2\text{O}_2]^+$ : 387.2078.

**2-(3-(1H-indol-3-yl)-1-methyl-2-oxoindolin-3-yl)octanal(3fa)**

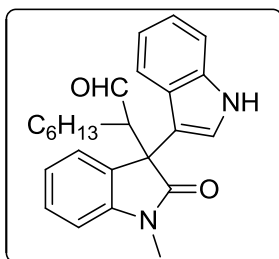

$dr = 55:45$  ratio (*syn*-**3fa**/*anti*-**3fa**) was determined by integration of  $\text{CHCHO}$   $^1\text{H NMR}$  signal. *Syn* diastereomer  $ee = 78\%$ ; *Anti* diastereomer  $ee = 81\%$ . The  $ee$  was determined by HPLC analysis Daicel Chiralcel AD-H column: hexane/*i*-PrOH 75:25, flow rate 1 mL/min,  $30^\circ\text{C}$ ,  $\lambda = 254$  nm: *Syn* diastereomer  $t_{\text{major}} = 9.173$  min,  $t_{\text{minor}} = 6.314$  min. *Anti* diastereomer  $t_{\text{major}} =$

Electronic Supplementary Material (ESI) for Organic & Biomolecular Chemistry  
This journal is © The Royal Society of Chemistry 2012

12.386 min,  $t_{minor} = 7.952$  min.  $^1\text{H NMR}$  (400 MHz,  $\text{DMSO-}d_6$ , mixture of two diastereomers):  $\delta = 0.77\text{-}0.81$  (m, 6H), 1.14-1.33 (m, 20H), 3.17 (s, 3H), 3.26 (s, 3H), 3.54 (d,  $J = 8.9$  Hz, 1H), 3.72 (d,  $J = 7.1$  Hz, 1H), 6.86-6.88 (m, 2H), 7.04-7.17 (m, 7H), 7.25-7.40 (m, 9H), 9.71 (s, 1H, diast.), 9.79 (s, 1H, diast.), 11.12 (s, 2H);  $^{13}\text{C NMR}$  (75 MHz,  $\text{DMSO-}d_6$ ):  $\delta = 203.35, 203.00, 176.67, 175.99, 143.75, 143.27, 136.97, 136.80, 130.78, 129.26, 128.72, 128.36, 125.36, 124.90, 124.71, 124.58, 124.48, 124.09, 122.46, 122.29, 121.31(2\text{C}), 120.46(2\text{C}), 118.82, 118.75, 112.18, 111.79, 111.26(2\text{C}), 108.90, 108.68, 55.03, 54.46, 53.51, 53.37, 30.95, 30.81, 28.47, 28.25, 27.13, 27.01, 26.16(2\text{C}), 24.77(2\text{C}), 21.90, 21.87, 13.86, 13.83$ ; **HRMS** (ESI): found:  $m/z = 387.2085$ , calcd. for  $[\text{C}_{25}\text{H}_{27}\text{N}_2\text{O}_2]^-$ : 387.2078.

**2-(5-bromo-3-(1H-indol-3-yl)-2-oxoindolin-3-yl)octanal(3ga)**

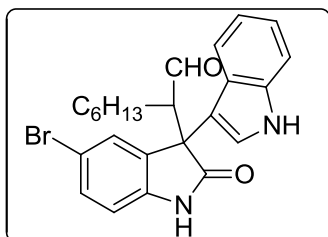

$dr = 60:40$  ratio (*syn-3ga/anti-3ga*) was determined by integration of  $\text{CHCHO}$   $^1\text{H NMR}$  signal. *Syn* diastereomer  $ee = 60\%$ ; *Anti* diastereomer  $ee = >99\%$ . The  $ee$  was determined by HPLC analysis Daicel Chiralcel OD-H column: hexane/*i*-PrOH 75:25, flow rate 1 mL/min, 30°C,  $\lambda = 254$  nm: *Syn* diastereomer  $t_{major} = 11.362$  min,  $t_{minor} = 4.844$  min. *Anti* diastereomer  $t_{major} = 6.128$  min.  $^1\text{H NMR}$  (400 MHz,  $\text{DMSO-}d_6$ , mixture of two diastereomers):  $\delta = 0.77\text{-}0.84$  (m, 6H), 1.16-1.20 (m, 20H), 3.52 (d,  $J = 9.4$  Hz, 1H), 3.73 (d,  $J = 8.5$  Hz, 1H), 6.87-6.96 (m, 4H), 7.04-7.10 (m, 3H), 7.21-7.27 (m, 2H), 7.36-7.42 (m, 6H), 7.48-7.50 (m, 1H), 9.80 (s, 2H), 10.82 (s, 1H, diast.), 10.97 (s, 1H, diast.), 11.15-11.19 (m, 2H);  $^{13}\text{C NMR}$  (75 MHz,  $\text{DMSO-}d_6$ ):  $\delta = 203.56, 202.97, 178.20, 177.38, 141.66, 141.16, 136.91, 136.70, 134.48, 132.80, 131.43, 131.02, 128.25, 126.96, 124.79(2\text{C}), 124.61(2\text{C}), 121.43, 121.38, 120.05, 119.38, 118.93, 118.88, 113.65, 113.45, 111.90(2\text{C}), 111.78, 111.59, 110.96(2\text{C}), 54.57, 54.11, 54.08, 53.98, 30.96, 30.81, 28.49, 28.16, 27.03, 26.99, 24.83, 23.92, 21.93, 21.90, 13.89(2\text{C})$ ; **HRMS** (ESI): found:  $m/z = 451.1054$ , calcd. for  $[\text{C}_{24}\text{H}_{24}\text{BrN}_2\text{O}_2]^-$ : 451.1027.

**2-(5-chloro-3-(1H-indol-3-yl)-2-oxoindolin-3-yl)octanal(3ha)**

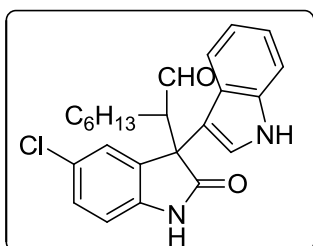

$dr = 60:40$  ratio (*syn-3ha/anti-3ha*) was determined by integration of  $\text{CHCHO}$   $^1\text{H NMR}$  signal. *Syn* diastereomer  $ee = 62\%$ ; *Anti* diastereomer  $ee = 79\%$ . The  $ee$  was determined by HPLC analysis Daicel Chiralcel OD-H column: hexane/*i*-PrOH 75:25, flow rate 1 mL/min, 30°C,  $\lambda = 254$  nm: *Syn* diastereomer  $t_{major} = 11.124$  min,  $t_{minor} = 4.735$  min. *Anti* diastereomer



Electronic Supplementary Material (ESI) for Organic & Biomolecular Chemistry  
This journal is © The Royal Society of Chemistry 2012

$t_{major} = 6.050$  min,  $t_{minor} = 12.525$  min.  $^1\text{H NMR}$  (400 MHz,  $\text{DMSO-}d_6$ , mixture of two diastereomers):  $\delta = 0.77\text{--}0.82$  (m, 6H), 1.16–1.23 (m, 20H), 3.52 (d,  $J = 10.1$  Hz, 1H), 3.71 (d,  $J = 9.7$  Hz, 1H), 6.86–7.00 (m, 4H), 7.05–7.09 (m, 3H), 7.20–7.31 (m, 5H), 7.35–7.42 (m, 4H), 9.77–9.80 (m, 2H), 10.80 (s, 1H, diast.), 10.95 (s, 1H, diast.), 11.14–11.18 (m, 2H);  $^{13}\text{C NMR}$  (75 MHz,  $\text{DMSO-}d_6$ ):  $\delta = 203.54, 202.95, 178.29, 177.49, 141.27, 140.75, 136.92, 136.71, 134.04, 132.36, 128.57, 128.16, 125.91, 125.73(2\text{C}), 125.61, 124.79(2\text{C}), 124.60(3\text{C}), 124.29, 121.37, 120.08, 119.43, 118.86, 111.87(2\text{C}), 111.25(2\text{C}), 111.06, 110.94, 54.17, 54.07(2\text{C}), 54.05, 30.95, 30.81, 28.48, 28.17, 27.01(2\text{C}), 24.82, 23.95, 21.92(2\text{C}), 13.87(2\text{C})$ ; **HRMS** (ESI): found:  $m/z = 407.1541$ , calcd. for  $[\text{C}_{24}\text{H}_{24}\text{ClN}_2\text{O}_2]^+$ : 407.1532.

### 2-(3-(1H-indol-3-yl)-2-oxoindolin-3-yl)propanal(3ab)

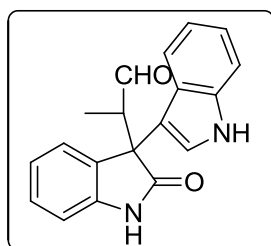

$dr = 60:40$  ratio (*syn-3ab/anti-3ab*) was determined by integration of  $\text{CHCHO}$   $^1\text{H NMR}$  signal. *Syn* diastereomer  $ee = 68\%$ ; *Anti* diastereomer  $ee = >99\%$ . The  $ee$  was determined by HPLC analysis Daicel Chiralcel OD-H column: hexane/*i*-PrOH 75:25, flow rate 1 mL/min, 30°C,  $\lambda = 254$  nm: *Syn* diastereomer  $t_{major} = 49.598$  min,  $t_{minor} = 7.813$  min. *Anti* diastereomer  $t_{major} = 9.937$  min.  $^1\text{H NMR}$  (400 MHz,  $\text{DMSO-}d_6$ , mixture of two diastereomers):  $\delta = 0.79$  (d,  $J = 6.7$  Hz, 3H), 0.90 (d,  $J = 6.9$  Hz, 3H), 3.76–3.87 (m, 2H), 6.82–6.85 (m, 1H), 6.89–6.95 (m, 2H), 6.97–7.06 (m, 4H), 7.08–7.12 (m, 3H), 7.18–7.32 (m, 6H), 7.35–7.37 (m, 2H), 9.79 (s, 1H, diast.), 9.93 (s, 1H, diast.), 10.65 (s, 1H, diast.), 10.79 (s, 1H, diast.), 11.15 (s, 2H);  $^{13}\text{C NMR}$  (75 MHz,  $\text{DMSO-}d_6$ ):  $\delta = 203.85, 203.27, 178.82, 177.86, 142.68, 141.84, 137.06, 136.93, 132.12, 129.92, 128.71, 128.16, 125.39, 125.16, 124.95, 124.70, 124.41, 124.23, 121.90, 121.72, 121.38, 121.32, 120.31, 119.83, 118.86, 118.75, 112.58, 111.89, 111.82, 111.51, 109.82, 109.78, 54.01(2\text{C}), 49.41, 48.82, 9.38, 9.14$ ; **HRMS** (ESI): found:  $m/z = 303.1132$ , calcd. for  $[\text{C}_{19}\text{H}_{15}\text{N}_2\text{O}_2]^+$ : 303.1139.

### 2-(3-(1H-indol-3-yl)-2-oxoindolin-3-yl)butanal(3ac)

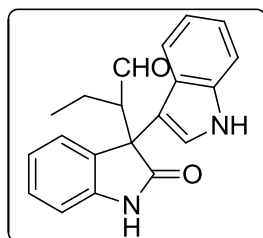

$dr = 70:30$  ratio (*syn-3ac/anti-3ac*) was determined by integration of  $\text{CHCHO}$   $^1\text{H NMR}$  signal. *Syn* diastereomer  $ee = 56\%$ ; *Anti* diastereomer  $ee = >99\%$ . The  $ee$  was determined by HPLC analysis Daicel Chiralcel OD-H column: hexane/*i*-PrOH 75:25, flow rate 1 mL/min, 30°C,  $\lambda$

Electronic Supplementary Material (ESI) for Organic & Biomolecular Chemistry  
This journal is © The Royal Society of Chemistry 2012

= 254 nm: *Syn* diastereomer  $t_{major} = 19.858$  min,  $t_{minor} = 6.020$  min. *Anti* diastereomer  $t_{major} = 7.455$  min.  $^1\text{H NMR}$  (400 MHz, DMSO- $d_6$ , mixture of two diastereomers):  $\delta = 0.80$  (t,  $J = 7.3$  Hz, 6H), 1.19-1.38 (m, 4H), 3.40-3.43 (m, 1H, diast.), 3.55-3.58 (m, 1H, diast.), 6.83-6.87 (m, 1H), 6.91-6.98 (m, 4H), 7.02-7.05 (m, 4H), 7.16-7.24 (m, 6H), 7.31-7.35 (m, 3H), 9.71 (d,  $J = 2.6$  Hz, 1H, diast.), 9.80 (d,  $J = 2.9$  Hz, 1H, diast.), 10.64 (s, 1H, diast.), 10.78 (s, 1H, diast.), 11.10 (s, 2H);  $^{13}\text{C NMR}$  (75 MHz, DMSO- $d_6$ ):  $\delta = 203.47, 203.09, 178.52, 177.75, 142.33, 141.80, 136.92, 136.78, 130.06, 129.90, 128.61, 128.24, 125.70, 125.55, 124.97, 124.83, 124.51, 124.41(2\text{C}), 124.32, 121.81, 121.62, 121.27, 120.43, 118.75, 118.68, 112.50, 111.74, 111.55, 109.86, 109.61, 108.28, 56.83, 56.20, 53.94, 53.85, 18.17, 17.66, 12.46, 12.15$ ; **HRMS** (ESI): found:  $m/z = 317.1294$ , calcd. for  $[\text{C}_{20}\text{H}_{17}\text{N}_2\text{O}_2]^+$ : 317.1296.

**2-(3-(1*H*-indol-3-yl)-2-oxoindolin-3-yl)-3-phenylpropanal(3ad)**

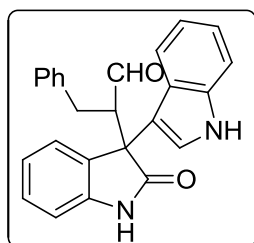

*dr* = 45:55 ratio (*syn*-**3ad**/*anti*-**3ad**) was determined by integration of  $\text{CHCHO}$   $^1\text{H NMR}$  signal. *Syn* diastereomer *ee* = 78%; *Anti* diastereomer *ee* = 80%. The *ee* was determined by HPLC analysis Daicel Chiralcel AD-H column: hexane/*i*-PrOH 75:25, flow rate 1 mL/min, 30°C,  $\lambda = 254$  nm: *Syn* diastereomer  $t_{major} = 26.000$  min,  $t_{minor} = 12.477$  min. *Anti* diastereomer  $t_{major} = 17.514$  min,  $t_{minor} = 21.833$  min.  $^1\text{H NMR}$  (400 MHz, DMSO- $d_6$ , mixture of two diastereomers):  $\delta = 2.39$ -2.42 (m, 2H), 2.74 (dd,  $J = 14.0, 10.3$  Hz, 1H), 3.06 (dd,  $J = 13.8, 11.1$  Hz, 1H), 3.88-3.92 (m, 1H), 4.10-4.13 (m, 1H), 6.87-6.91 (m, 1H), 6.96-7.02 (m, 6H), 7.07-7.11 (m, 5H), 7.17-7.20 (m, 5H), 7.23-7.27 (m, 5H), 7.33-7.37 (m, 4H), 7.43-7.44 (m, 1H), 7.59-7.62 (m, 1H), 9.68 (d,  $J = 2.6$  Hz, 1H, diast.), 9.78 (d,  $J = 2.6$  Hz, 1H, diast.), 10.75 (s, 1H, diast.), 10.83 (s, 1H, diast.), 11.16-11.17 (m, 2H);  $^{13}\text{C NMR}$  (75 MHz, DMSO- $d_6$ ):  $\delta = 202.80, 202.15, 178.12, 177.59, 142.28, 141.91, 139.16, 138.97, 137.00, 136.97, 130.94, 129.73, 128.83(2\text{C}), 128.77(2\text{C}), 128.49, 128.33(4\text{C}), 128.22(4\text{C}), 126.20, 126.14, 125.68, 124.94, 124.77, 124.71, 124.68, 121.90, 121.77, 121.43, 121.34, 120.48, 120.23, 118.81(2\text{C}), 111.90, 111.14, 110.04, 109.84, 57.14, 56.20, 54.25, 54.22, 30.83, 30.41$ ; **HRMS** (ESI): found:  $m/z = 379.1468$ , calcd. for  $[\text{C}_{25}\text{H}_{19}\text{N}_2\text{O}_2]^+$ : 379.1452.

**2-(3-(5-bromo-1*H*-indol-3-yl)-2-oxoindolin-3-yl)propanal(3db)**

Electronic Supplementary Material (ESI) for Organic & Biomolecular Chemistry  
This journal is © The Royal Society of Chemistry 2012

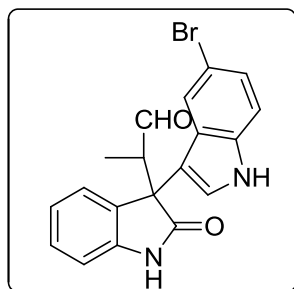

$dr = 62:38$  ratio (*syn*-**3db**/*anti*-**3db**) was determined by integration of  $\text{CHCHO}$   $^1\text{H}$  NMR signal. *Syn* diastereomer  $ee = 64\%$ ; *Anti* diastereomer  $ee = >99\%$ . The  $ee$  was determined by HPLC analysis Daicel Chiralcel OD-H column: hexane/*i*-PrOH 75:25, flow rate 1 mL/min,  $30^\circ\text{C}$ ,  $\lambda = 254$  nm: *Syn* diastereomer  $t_{\text{major}} = 31.871$  min,  $t_{\text{minor}} = 6.390$  min. *Anti* diastereomer  $t_{\text{major}} = 7.192$  min.  $^1\text{H}$  NMR (400 MHz,  $\text{DMSO-}d_6$ , mixture of two diastereomers):  $\delta = 0.77$  (d,  $J = 6.7$  Hz, 3H), 0.92 (d,  $J = 7.0$  Hz, 3H), 3.81 (q,  $J = 7.5$  Hz, 1H), 4.03 (q,  $J = 7.1$  Hz, 1H), 6.94-7.05 (m, 4H), 7.12-7.26 (m, 6H), 7.32-7.35 (m, 5H), 7.62 (s, 1H), 9.73 (s, 1H, diast.), 9.87 (s, 1H, diast.), 10.69 (s, 1H, diast.), 10.84 (s, 1H, diast.), 11.39 (s, 2H);  $^{13}\text{C}$  NMR (75 MHz,  $\text{DMSO-}d_6$ ):  $\delta = 203.58, 202.90, 178.57, 177.59, 142.58, 141.79, 135.74, 135.58, 131.46, 129.30, 128.85, 128.34, 126.76, 126.60, 126.30, 126.01, 125.44, 124.55, 123.90, 123.82, 122.65, 121.97, 121.94, 121.79, 113.87, 113.80, 112.21, 111.55, 111.44, 111.19, 109.87, 109.84, 53.83, 53.68, 49.55, 48.74, 9.30, 9.06$ ; HRMS (ESI): found:  $m/z = 381.0244$ , calcd. for  $[\text{C}_{19}\text{H}_{14}\text{BrN}_2\text{O}_2]$ : 381.0244.

**2-(3-(5-bromo-1H-indol-3-yl)-2-oxoindolin-3-yl)butanal(3dc)**

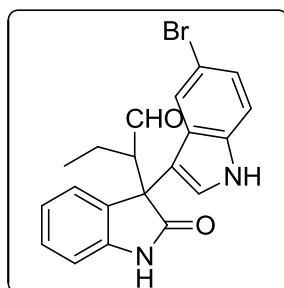

$dr = 52:48$  ratio (*syn*-**3dc**/*anti*-**3dc**) was determined by integration of  $\text{CHCHO}$   $^1\text{H}$  NMR signal. *Syn* diastereomer  $ee = 77\%$ ; *Anti* diastereomer  $ee = 68\%$ . The  $ee$  was determined by HPLC analysis Daicel Chiralcel OD-H column: hexane/*i*-PrOH 75:25, flow rate 1 mL/min,  $30^\circ\text{C}$ ,  $\lambda = 254$  nm: *Syn* diastereomer  $t_{\text{major}} = 14.711$  min,  $t_{\text{minor}} = 5.574$  min. *Anti* diastereomer  $t_{\text{major}} = 5.844$  min,  $t_{\text{minor}} = 10.060$  min.  $^1\text{H}$  NMR (400 MHz,  $\text{DMSO-}d_6$ , mixture of two diastereomers):  $\delta = 0.78-0.82$  (m, 6H), 1.16-1.24 (m, 4H), 3.39 (d,  $J = 10.2$  Hz, 1H), 3.52 (d,  $J = 9.8$  Hz, 1H), 6.93-7.00 (m, 3H), 7.03-7.09 (m, 2H), 7.16-7.18 (m, 2H), 7.23-7.27 (m, 4H), 7.32-7.34 (m, 3H), 7.41 (s, 1H), 7.55 (s, 1H), 9.67 (s, 1H, diast.), 9.77 (s, 1H, diast.), 10.69 (s, 1H, diast.), 10.83 (s, 1H, diast.), 11.32-11.36 (m, 2H);  $^{13}\text{C}$  NMR (75 MHz,  $\text{DMSO-}d_6$ ):  $\delta = 203.29, 202.92, 178.32, 177.58, 142.29, 141.77, 135.67, 135.49, 131.15, 129.48, 128.79, 128.47, 126.62, 126.53, 126.15(2\text{C}), 125.82(2\text{C}), 124.59, 123.84, 122.79, 121.92, 121.75, 113.85, 113.77, 112.17, 111.48, 111.42(2\text{C}), 111.26, 109.99, 109.73, 56.89, 56.19, 53.82, 53.65, 18.26, 17.64(1), 12.49(1), 12.08$ ; HRMS (ESI): found:  $m/z = 395.0408$ , calcd. for  $[\text{C}_{20}\text{H}_{16}\text{BrN}_2\text{O}_2]$ :

Electronic Supplementary Material (ESI) for Organic & Biomolecular Chemistry  
This journal is © The Royal Society of Chemistry 2012

395.0401.

### 2-(3-(7-methyl-1H-indol-3-yl)-2-oxoindolin-3-yl)propanal(3eb)

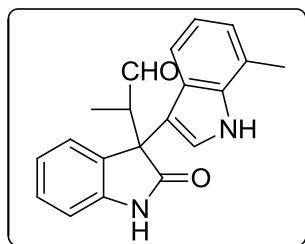

$dr = 34:66$  ratio (*syn*-**3eb**/*anti*-**3eb**) was determined by integration of  $\text{CHCHO}$   $^1\text{H}$  NMR signal. *Syn* diastereomer  $ee = 83\%$ ; *Anti* diastereomer  $ee = 84\%$ . The  $ee$  was determined by HPLC analysis Daicel Chiralcel AD-H column: hexane/*i*-PrOH 75:25, flow rate 1 mL/min,  $30^\circ\text{C}$ ,  $\lambda = 254$  nm: *Syn* diastereomer  $t_{\text{major}} = 9.174$  min,  $t_{\text{minor}} = 10.525$  min. *Anti* diastereomer  $t_{\text{major}} = 12.255$  min,  $t_{\text{minor}} = 10.961$  min.  $^1\text{H}$  NMR (400 MHz,  $\text{DMSO-}d_6$ , mixture of two diastereomers):  $\delta = 0.78$  (d,  $J = 6.7$  Hz, 3H, diast.), 0.88 (d,  $J = 6.9$  Hz, 3H, diast.), 2.42 (s, 6H), 3.76-3.79 (m, 1H, diast.), 3.81-3.86 (m, 1H, diast.), 6.70-6.74 (m, 1H), 6.79-6.87 (m, 4H), 6.91-7.00 (m, 4H), 7.07-7.09 (m, 1H), 7.18-7.23 (m, 3H), 7.27-7.32 (m, 3H), 9.81 (s, 1H, diast.), 9.94 (s, 1H, diast.), 10.63 (s, 1H, diast.), 10.78 (s, 1H, diast.), 11.11 (s, 2H);  $^{13}\text{C}$  NMR (75 MHz,  $\text{DMSO-}d_6$ ):  $\delta = 203.84, 203.29, 178.75, 177.79, 142.64, 141.76, 136.39, 136.29, 132.20, 129.98, 128.63, 128.06, 125.31(2\text{C}), 124.82, 124.59, 124.32, 123.81, 121.79, 121.69(2\text{C}), 121.64, 120.89, 120.78, 119.00, 118.88, 117.73, 117.30, 113.05, 111.95, 109.68(2\text{C}), 54.01, 53.92, 49.26, 48.73, 16.72(2\text{C}), 9.32, 9.06$ ; HRMS (ESI): found:  $m/z = 317.1310$ , calcd. for  $[\text{C}_{20}\text{H}_{17}\text{N}_2\text{O}_2]$ : 317.1296.

### 2-(3-(7-methyl-1H-indol-3-yl)-2-oxoindolin-3-yl)butanal(3ec)

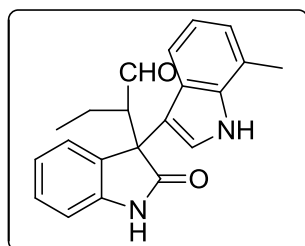

$dr = 34:66$  ratio (*syn*-**3ec**/*anti*-**3ec**) was determined by integration of  $\text{CHCHO}$   $^1\text{H}$  NMR signal. *Syn* diastereomer  $ee = 75\%$ ; *Anti* diastereomer  $ee = 78\%$ . The  $ee$  was determined by HPLC analysis Daicel Chiralcel AD-H column: hexane/*i*-PrOH 75:25, flow rate 1 mL/min,  $30^\circ\text{C}$ ,  $\lambda = 254$  nm: *Syn* diastereomer  $t_{\text{major}} = 8.624$  min,  $t_{\text{minor}} = 9.472$  min. *Anti* diastereomer  $t_{\text{major}} = 13.113$  min,  $t_{\text{minor}} = 12.003$  min.  $^1\text{H}$  NMR (400 MHz,  $\text{DMSO-}d_6$ , mixture of two diastereomers):  $\delta = 0.80$  (t,  $J = 7.2$  Hz, 6H), 1.19-1.40 (m, 4H), 2.41 (s, 6H), 3.40-3.42 (m, 1H, diast.), 3.55-3.58 (m, 1H, diast.), 6.73-6.86 (m, 4H), 6.91-6.94 (m, 1H), 6.97-7.04 (m, 6H), 7.15-7.16 (m, 1H), 7.19-7.25 (m, 3H), 7.29-7.32 (m, 1H), 9.74 (d,  $J = 2.8$  Hz, 1H, diast.), 9.81 (d,  $J = 2.9$  Hz, 1H, diast.), 10.63 (s, 1H, diast.), 10.78 (s, 1H, diast.), 11.07 (s, 2H);  $^{13}\text{C}$  NMR (75 MHz,  $\text{DMSO-}d_6$ ):  $\delta = 203.53, 203.18, 178.55, 177.78, 142.37, 141.80, 136.33, 136.21,$

Electronic Supplementary Material (ESI) for Organic & Biomolecular Chemistry  
This journal is © The Royal Society of Chemistry 2012

131.89, 130.16, 128.59, 128.21, 125.68, 124.70, 124.54, 124.34, 124.21, 123.98, 121.74, 121.61(2C), 120.85(2C), 120.74, 118.96, 118.89, 117.98, 117.36, 113.06, 112.07, 109.83, 109.58, 56.80, 56.17, 53.93, 53.87, 18.12, 17.63, 16.70(2C), 12.42, 12.14; **HRMS** (ESI): found:  $m/z = 331.1462$ , calcd. for  $[C_{21}H_{19}N_2O_2]^-$ : 331.1452.

**2-(3-(7-methyl-1H-indol-3-yl)-2-oxoindolin-3-yl)-3-phenylpropanal(3ed)**

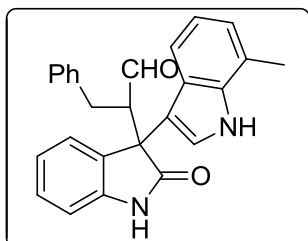

$dr = 43:57$  ratio (*syn-3ed/anti-3ed*) was determined by integration of  $\underline{CHCHO}$   $^1H$  NMR signal. *Syn* diastereomer  $ee = 73\%$ ; *Anti* diastereomer  $ee = >99\%$ . The  $ee$  was determined by HPLC analysis Daicel Chiralcel OD-H column: hexane/*i*-PrOH 75:25, flow rate 1 mL/min, 30°C,  $\lambda = 254$  nm: *Syn* diastereomer  $t_{major} = 30.187$  min,  $t_{minor} = 7.336$  min. *Anti* diastereomer  $t_{major} = 8.428$  min.  $^1H$  NMR (400 MHz, DMSO- $d_6$ , mixture of two diastereomers):  $\delta = 2.39-2.46$  (m, 8H), 2.74 (dd,  $J = 14.0, 10.6$  Hz, 1H), 3.04 (dd,  $J = 13.7, 11.0$  Hz, 1H), 3.88 (d,  $J = 10.9$  Hz, 1H), 4.10 (d,  $J = 10.4$  Hz, 1H), 6.76-6.80 (m, 1H), 6.84-6.87 (m, 3H), 6.99-7.05 (m, 6H), 7.10-7.12 (m, 4H), 7.16-7.20 (m, 5H), 7.23-7.26 (m, 4H), 7.31-7.35 (m, 1H), 7.39-7.41 (m, 2H), 9.70 (d,  $J = 2.7$  Hz, 1H, diast.), 9.78 (d,  $J = 2.5$  Hz, 1H, diast.), 10.72 (s, 1H, diast.), 10.81 (s, 1H, diast.), 11.09-11.11 (m, 2H);  $^{13}C$  NMR (75 MHz, DMSO- $d_6$ ):  $\delta = 202.84, 202.20, 178.12, 177.59, 142.28, 141.89, 139.14, 138.99, 136.36(2C), 131.12, 129.83, 128.83(2C), 128.75(4C), 128.44, 128.28(3C), 126.17, 126.11, 125.64, 124.73, 124.65, 124.47, 124.33(2C), 121.89(2C), 121.77(2C), 120.92, 120.85, 119.00(2C), 118.01, 117.75, 112.45, 111.63, 109.98, 109.79, 57.06, 56.14, 54.26, 54.20, 30.79, 30.37, 16.72(2C)$ ; **HRMS** (ESI): found:  $m/z = 393.1618$ , calcd. for  $[C_{26}H_{21}N_2O_2]^-$ : 393.1609.

**2-(3-(1H-indol-3-yl)-1-methyl-2-oxoindolin-3-yl)propanal(3fb)**

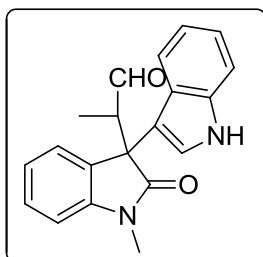

$dr = 48:52$  ratio (*syn-3fb/anti-3fb*) was determined by integration of  $\underline{CHCHO}$   $^1H$  NMR signal. *Syn* diastereomer  $ee = >99\%$ ; *Anti* diastereomer  $ee = >99\%$ . The  $ee$  was determined by HPLC analysis Daicel Chiralcel AD-H column: hexane/*i*-PrOH 75:25, flow rate 1 mL/min, 30°C,  $\lambda = 254$  nm: *Syn* diastereomer  $t_{major} = 10.598$  min. *Anti* diastereomer  $t_{major} = 12.935$  min.  $^1H$  NMR (400 MHz, DMSO- $d_6$ , mixture of two diastereomers):  $\delta = 0.73$  (d,  $J = 6.6$  Hz, 3H), 0.87 (d,  $J = 7.0$  Hz, 3H), 3.18 (s, 3H), 3.26 (s, 3H), 3.82-3.93 (m, 2H), 6.82-6.86 (m, 1H), 6.89-6.92 (m,

Electronic Supplementary Material (ESI) for Organic & Biomolecular Chemistry  
This journal is © The Royal Society of Chemistry 2012

1H), 7.03-7.08 (m, 4H), 7.11-7.22 (m, 5H), 7.28-7.32 (m, 3H), 7.35-7.41 (m, 4H), 9.75-9.79 (m, 1H, diast.), 9.88-9.91 (m, 1H, diast.), 11.17 (m, 2H); <sup>13</sup>C NMR (75 MHz, DMSO-*d*<sub>6</sub>): δ = 203.62, 203.11, 176.88, 176.07, 144.00, 143.26, 137.00, 136.87, 131.16, 129.15, 128.77, 128.24, 125.00, 124.98, 124.79, 124.72, 124.29, 124.07, 122.52, 122.33, 121.35, 121.30, 120.18, 119.67, 118.89, 118.76, 112.21, 111.84, 111.81, 111.15, 108.79(2C), 53.48(2C), 49.46, 48.91, 26.15(2C), 9.35, 9.09; HRMS (ESI): found: *m/z* = 317.1295, calcd. for [C<sub>20</sub>H<sub>17</sub>N<sub>2</sub>O<sub>2</sub>]<sup>+</sup>: 317.1296.

**2-(3-(1*H*-indol-3-yl)-2-oxoindolin-3-yl)-2-phenylacetaldehyde(3ae)**

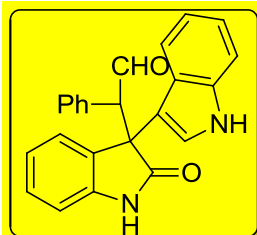

*dr* = 28:72 ratio (*syn*-**3ae**/*anti*-**3ae**) was determined by integration of CHCHO <sup>1</sup>H NMR signal. *Syn* diastereomer *ee* = 8%; *Anti* diastereomer *ee* = 50%. The *ee* was determined by HPLC analysis Daicel Chiralcel AD-H column: hexane/*i*-PrOH 75:25, flow rate 1 mL/min, 30°C, λ = 254 nm: *Syn* diastereomer *t*<sub>major</sub> = 16.474 min, *t*<sub>minor</sub> = 23.171 min. *Anti* diastereomer *t*<sub>major</sub> = 27.758 min, *t*<sub>minor</sub> = 32.016 min. <sup>1</sup>H NMR (400 MHz, DMSO-*d*<sub>6</sub>, mixture of two diastereomers): δ = 5.02-5.03 (m, 2H), 6.65 (d, *J* = 7.8 Hz, 1H), 6.75 (d, *J* = 8.2 Hz, 1H), 6.81 (t, *J* = 7.8 Hz, 2H), 6.94-7.21 (m, 19H), 7.30 (t, *J* = 7.6 Hz, 1H), 7.37-7.41 (m, 2H), 7.56 (d, *J* = 7.5 Hz, 1H), 7.66 (d, *J* = 8.0 Hz, 1H), 10.15 (s, 1H, diast., CHO), 10.23 (s, 1H, diast., NH), 10.29 (s, 1H, diast., CHO), 10.75 (s, 1H, NH), 11.22 (s, 2H); <sup>13</sup>C NMR (75 MHz, DMSO-*d*<sub>6</sub>): δ = 201.79, 200.68, 179.08, 176.97, 142.82, 141.23, 136.93, 136.87, 134.21, 132.97, 131.94(2C), 130.40, 130.16(3C), 130.01, 128.91, 127.78(3C), 127.69(2C), 127.61, 127.24, 126.67, 125.16, 124.84, 124.77, 124.57, 121.57, 121.46, 121.32, 121.23, 120.09, 119.85, 118.95, 118.68, 112.68, 111.93, 111.75, 111.44, 109.59, 109.32, 60.91, 60.61, 55.42, 55.09; HRMS (ESI): found: *m/z* = 389.1260, calcd. for [C<sub>24</sub>H<sub>18</sub>N<sub>2</sub>O<sub>2</sub>Na]<sup>+</sup>: 389.1260.

Electronic Supplementary Material (ESI) for Organic & Biomolecular Chemistry  
This journal is © The Royal Society of Chemistry 2012

### Determination of the absolute configuration of the alkylation products:

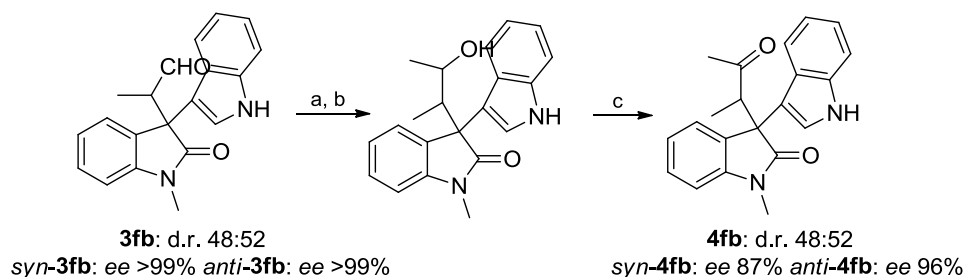

a. CH<sub>3</sub>MgBr, THF(-78 °C); b. NH<sub>4</sub>Cl (aqueous). c. IBX, DMSO, RT

The relative and absolute configurations of the *syn* and *anti* product **3fb** were assigned by chemical correlation to a known derivative **4fb** obtained by Guo and Peng. Compound *syn*-**4fb** was assigned by comparison of its elution order from a chiral phase HPLC column to those reported in the literature.<sup>3</sup>

### 3-(1*H*-indol-3-yl)-1-methyl-3-(3-oxobutan-2-yl)indolin-2-one(*syn*-**4fb**)

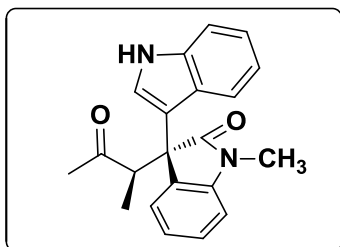

*syn*-**4fb** ee = 87%; The ee was determined by HPLC analysis Daicel Chiralcel AD-H column: hexane/*i*-PrOH 70:30, flow rate 0.5 mL/min, 30°C, λ = 254 nm:  $t_{major}$  = 20.905 min,  $t_{minor}$  = 13.601 min. <sup>1</sup>H NMR (400 MHz, DMSO): δ = 1.01 (d,  $J$  = 7.1 Hz, 3H), 1.93 (s, 3H), 3.18 (s, 3H), 4.27 (q,  $J$  = 7.0 Hz, 1H), 6.92 (t,  $J$  = 7.5 Hz, 1H), 7.02 (dt,  $J$  = 13.4, 5.4 Hz, 4H), 7.26-7.33 (m, 2H), 7.49 (d,  $J$  = 7.3 Hz, 1H), 7.61 (d,  $J$  = 8.0 Hz, 1H), 11.00 (s, 1H); <sup>13</sup>C NMR (75 MHz, DMSO): δ = 209.36, 176.83, 143.58, 136.82, 131.00, 127.93, 125.10, 124.98, 123.91, 121.67, 121.09, 120.52, 118.65, 112.54, 111.75, 108.25, 53.21, 50.31, 30.36, 26.09, 12.28; HRMS (ESI):  $m/z$  = 331.1465, calcd. for [C<sub>21</sub>H<sub>19</sub>N<sub>2</sub>O<sub>2</sub>]: 331.1452.

<sup>3</sup> L. Song, Q.-X. Guo, X.-C. Li, J. Tian and Y.-G. Peng, *Angew. Chem., Int. Ed.*, 2012, **51**, 1899.

Electronic Supplementary Material (ESI) for Organic & Biomolecular Chemistry  
This journal is © The Royal Society of Chemistry 2012

### Copy of NMR spectra of products:

#### 2-(3-(1*H*-indol-3-yl)-2-oxoindolin-3-yl)octanal(3aa)

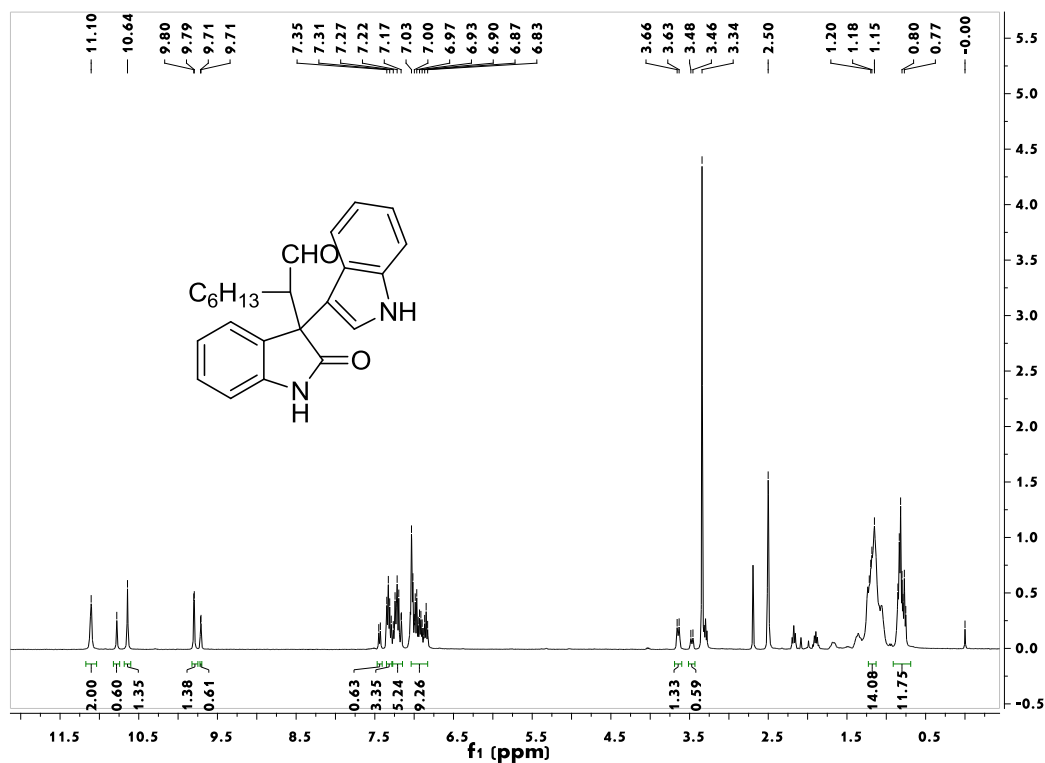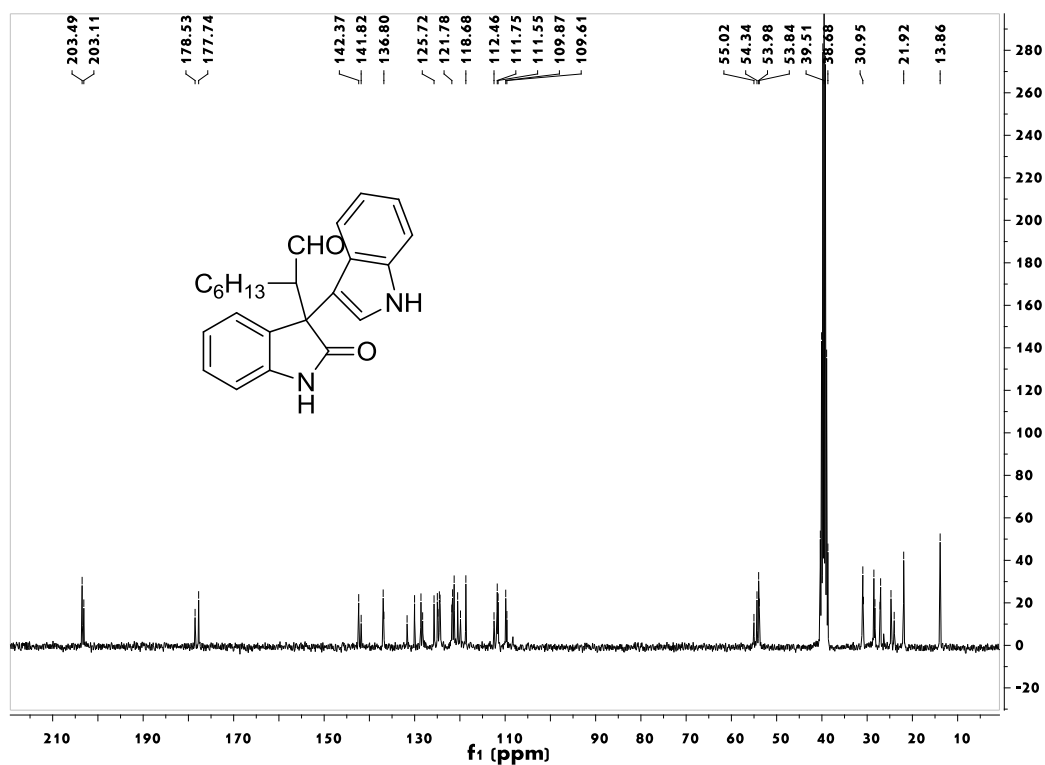



Electronic Supplementary Material (ESI) for Organic & Biomolecular Chemistry  
This journal is © The Royal Society of Chemistry 2012

### 2-(3-(5-methyl-1*H*-indol-3-yl)-2-oxindolin-3-yl)octanal(3ba)

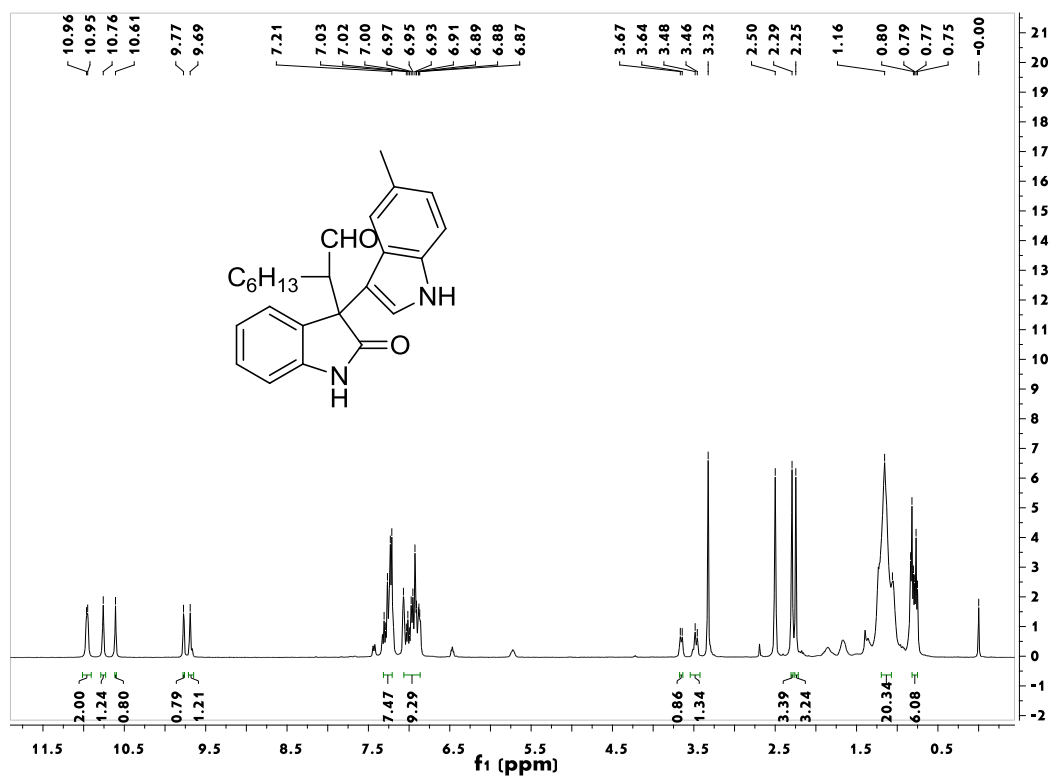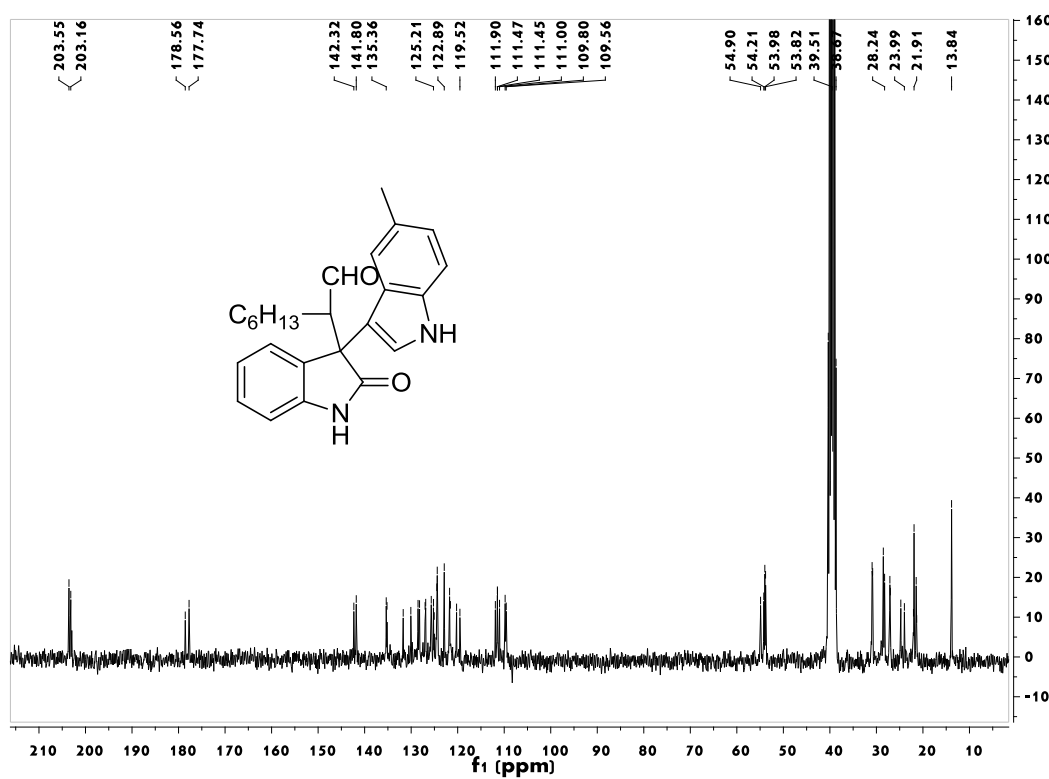

Electronic Supplementary Material (ESI) for Organic & Biomolecular Chemistry  
This journal is © The Royal Society of Chemistry 2012

2-(3-(5-methoxy-1*H*-indol-3-yl)-2-oxoindolin-3-yl)octanal(3ca)

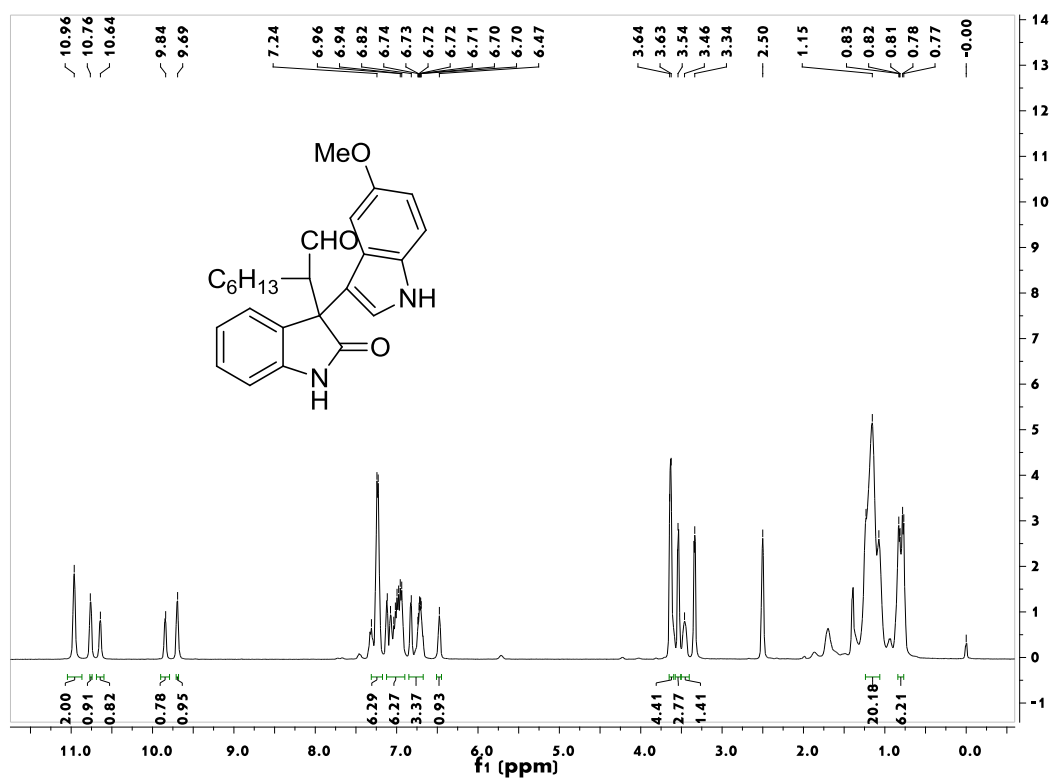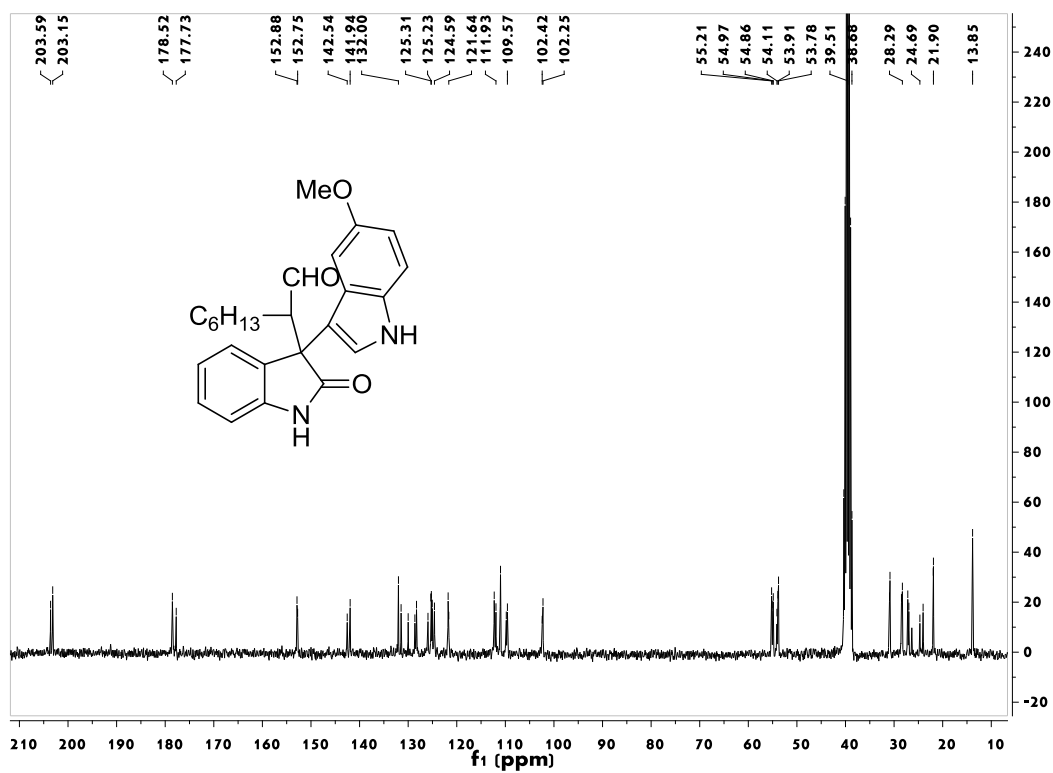

Electronic Supplementary Material (ESI) for Organic & Biomolecular Chemistry  
This journal is © The Royal Society of Chemistry 2012

### 2-(3-(5-bromo-1H-indol-3-yl)-2-oxoindolin-3-yl)octanal(3da)

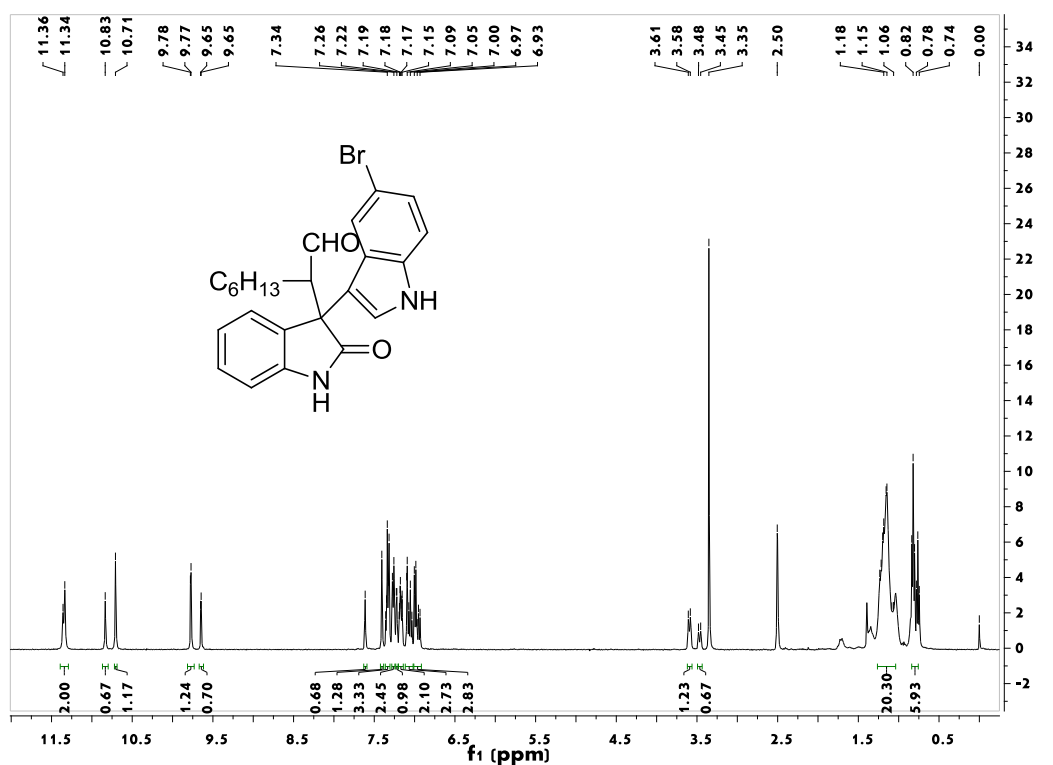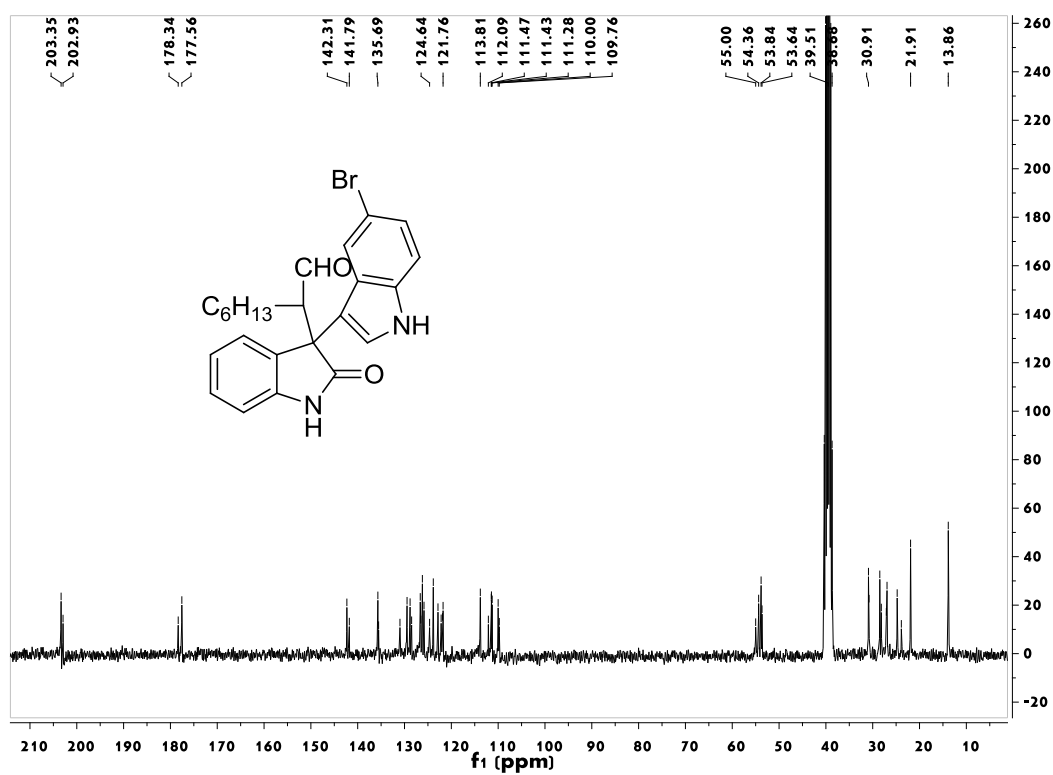

Electronic Supplementary Material (ESI) for Organic & Biomolecular Chemistry  
This journal is © The Royal Society of Chemistry 2012

### 2-(3-(7-methyl-1*H*-indol-3-yl)-2-oxindolin-3-yl)octanal(3ea)

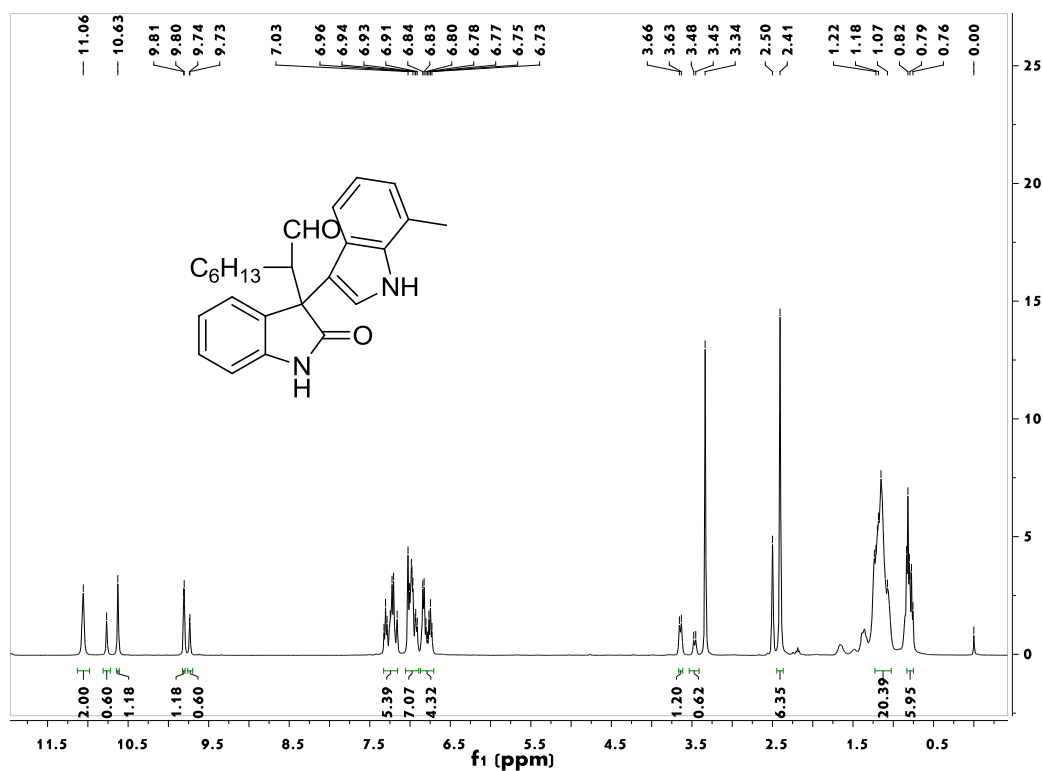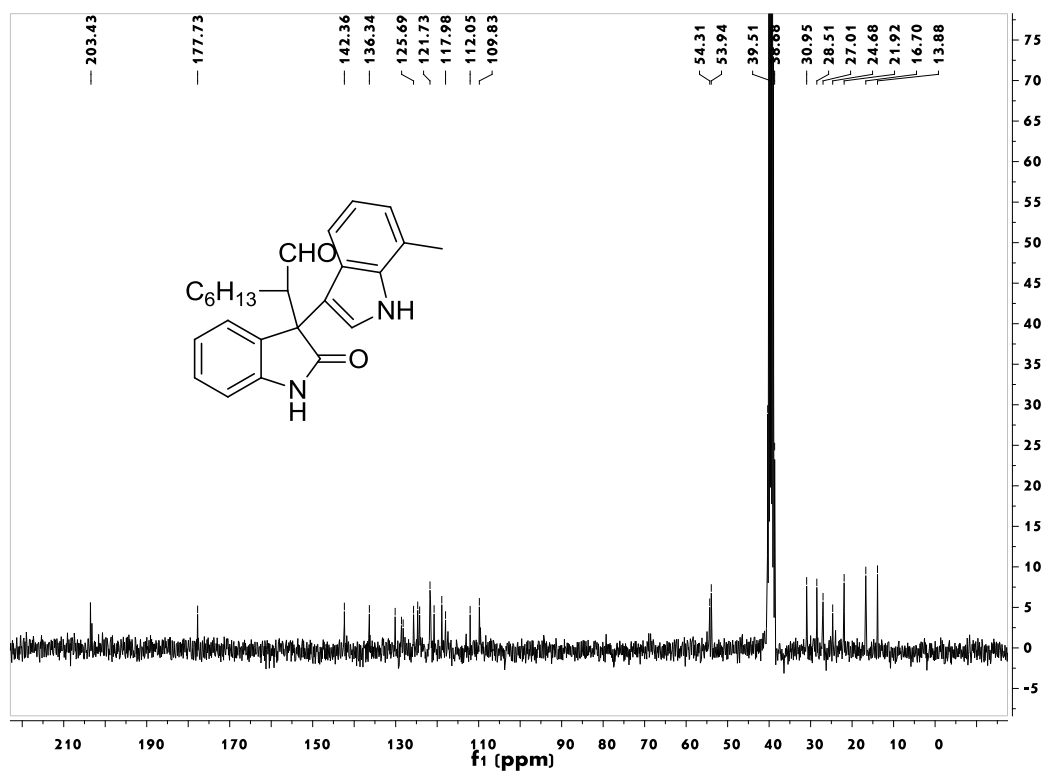

Electronic Supplementary Material (ESI) for Organic & Biomolecular Chemistry  
This journal is © The Royal Society of Chemistry 2012

### 2-(3-(1*H*-indol-3-yl)-1-methyl-2-oxindolin-3-yl)octanal(3fa)

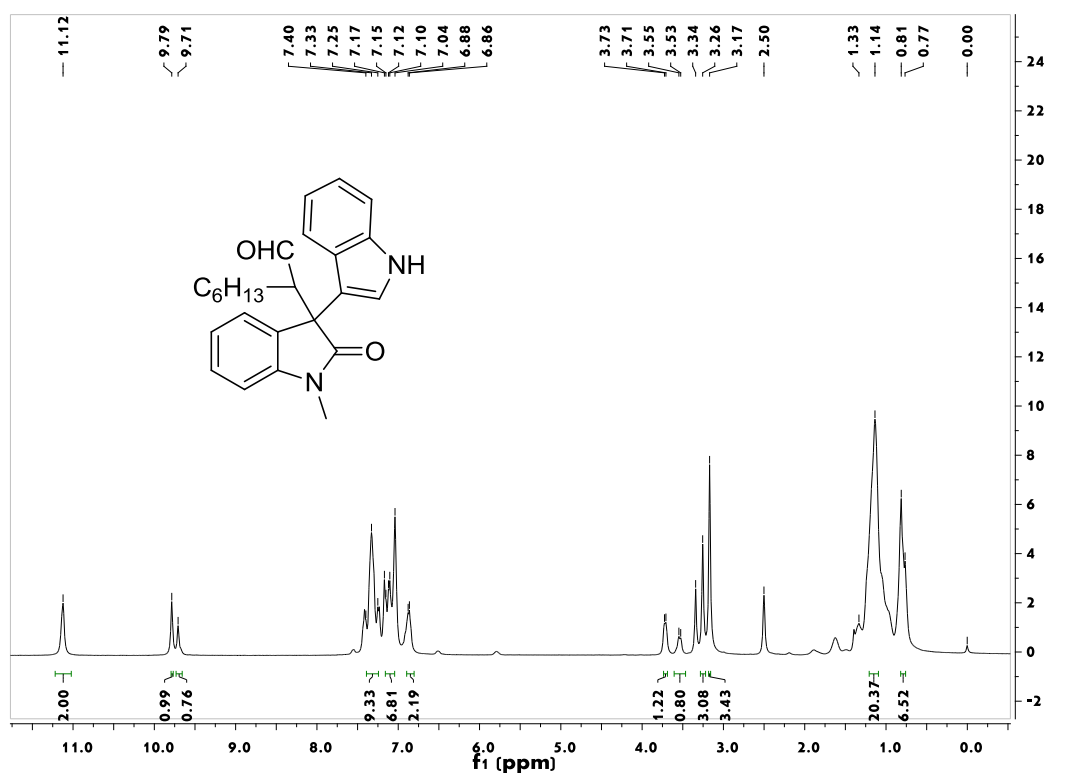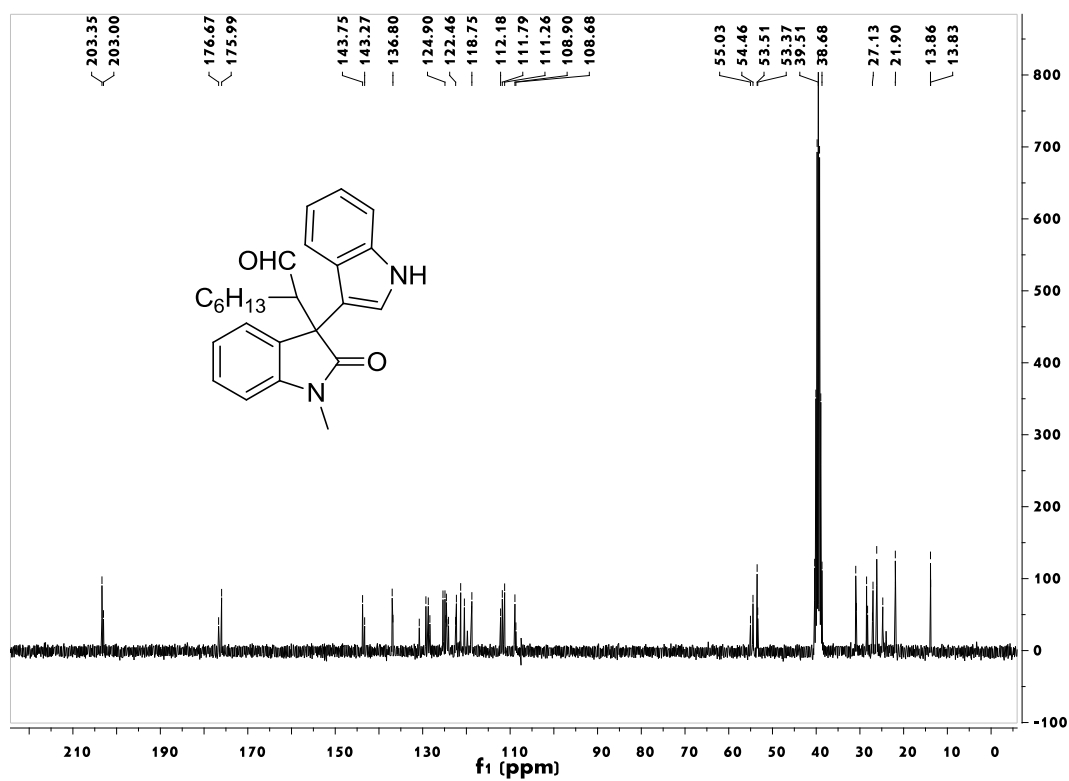

Electronic Supplementary Material (ESI) for Organic & Biomolecular Chemistry  
This journal is © The Royal Society of Chemistry 2012

**2-(5-bromo-3-(1*H*-indol-3-yl)-2-oxoindolin-3-yl)octanal(3ga)**

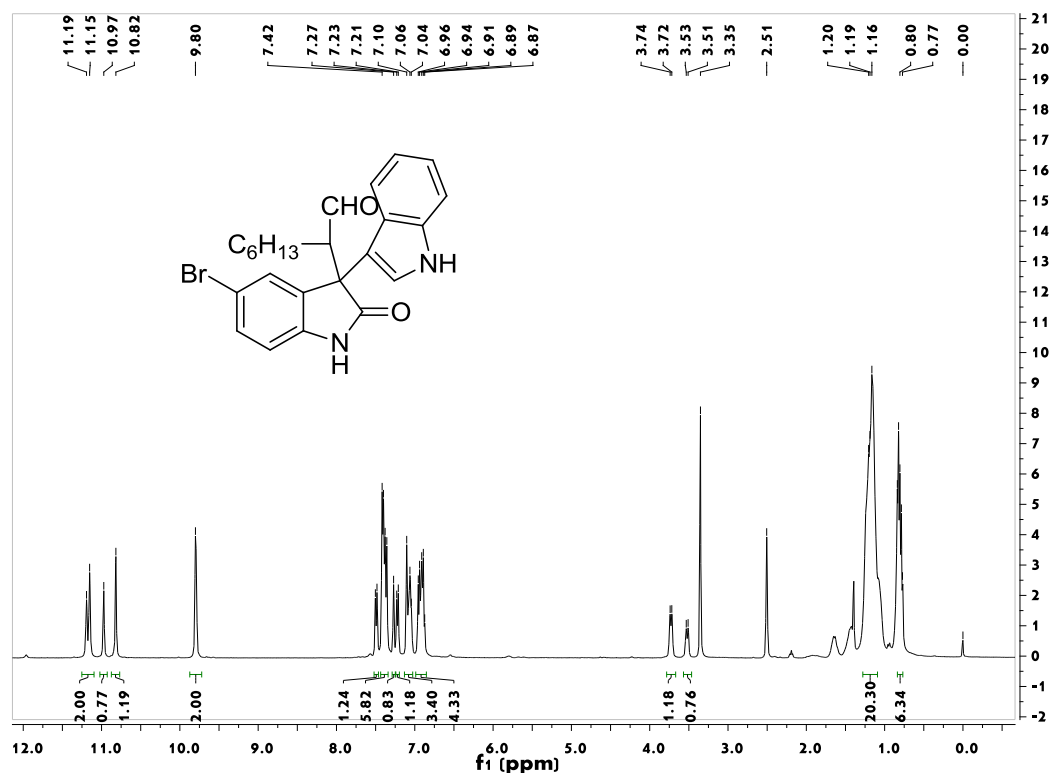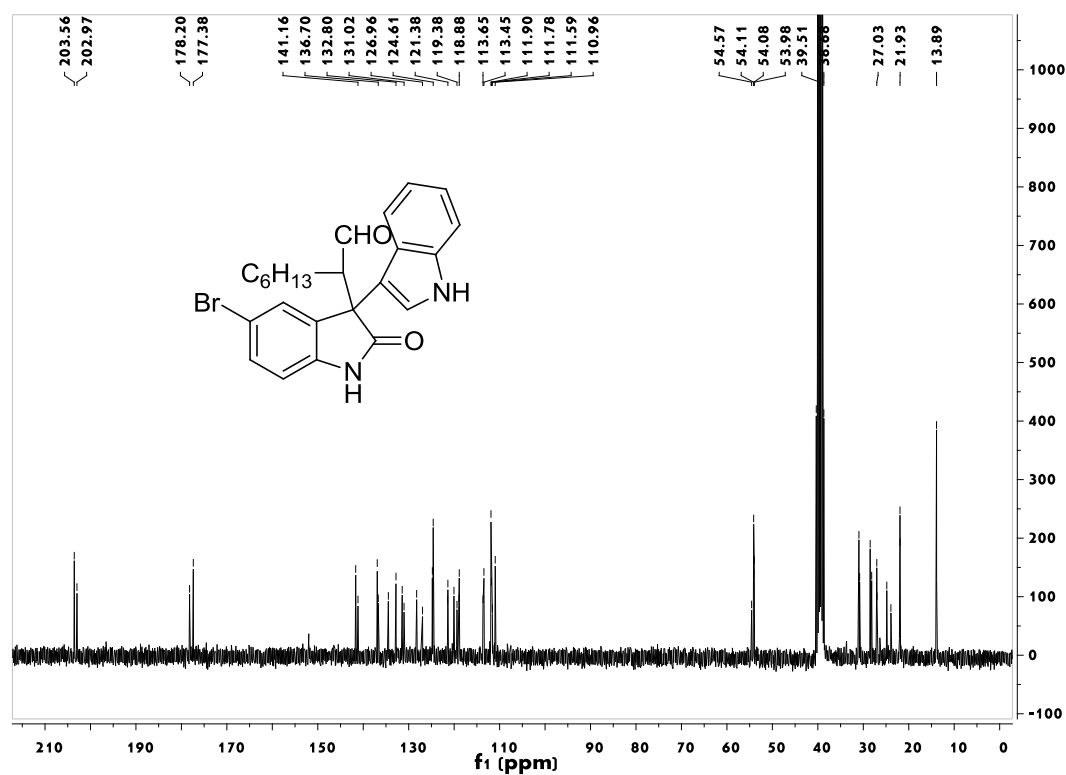

Electronic Supplementary Material (ESI) for Organic & Biomolecular Chemistry  
This journal is © The Royal Society of Chemistry 2012

2-(5-chloro-3-(1H-indol-3-yl)-2-oxindolin-3-yl)octanal(3ha)

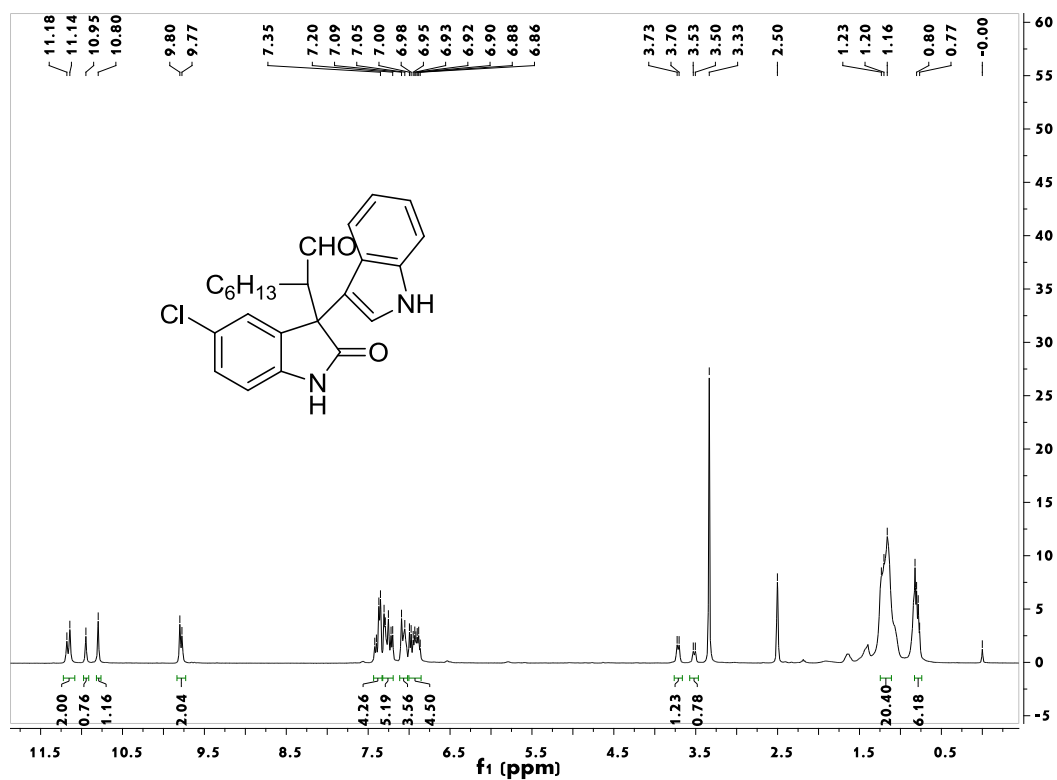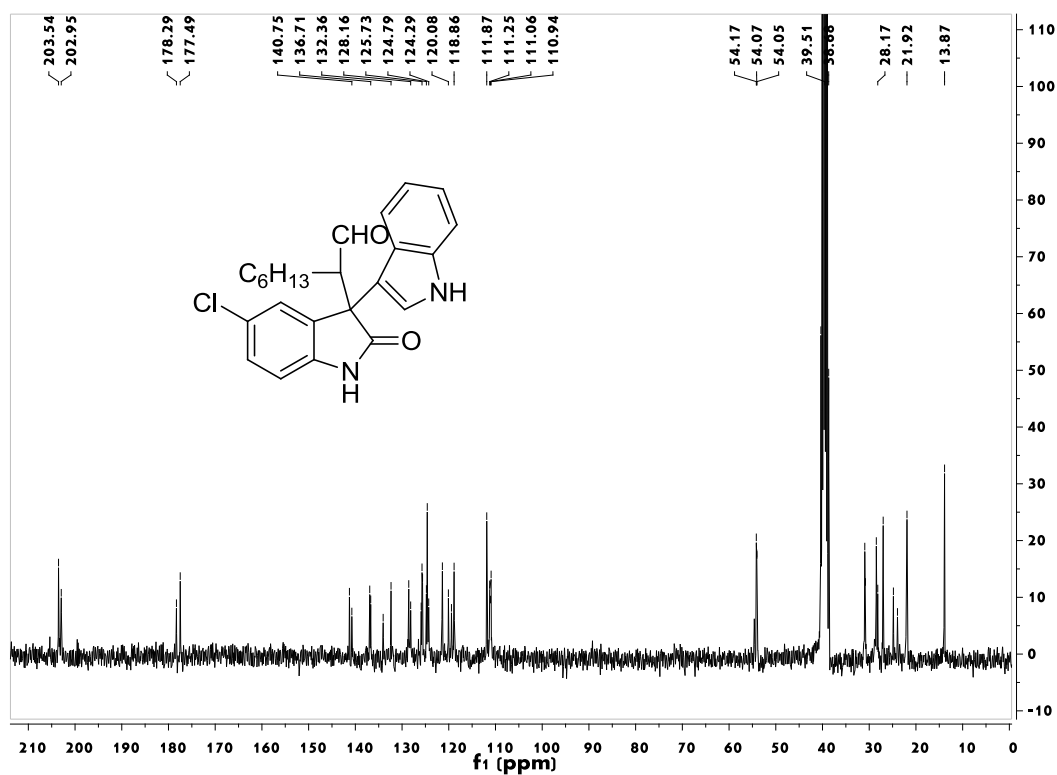

Electronic Supplementary Material (ESI) for Organic & Biomolecular Chemistry  
This journal is © The Royal Society of Chemistry 2012

### 2-(3-(1*H*-indol-3-yl)-2-oxoindolin-3-yl)propanal(3ab)

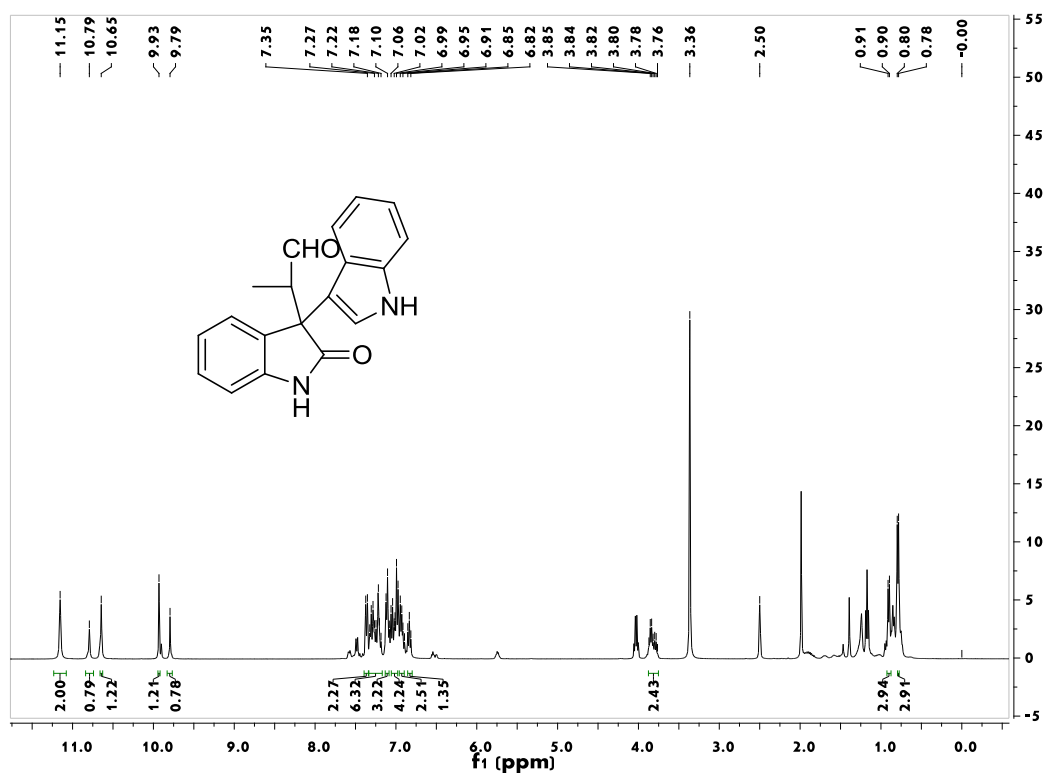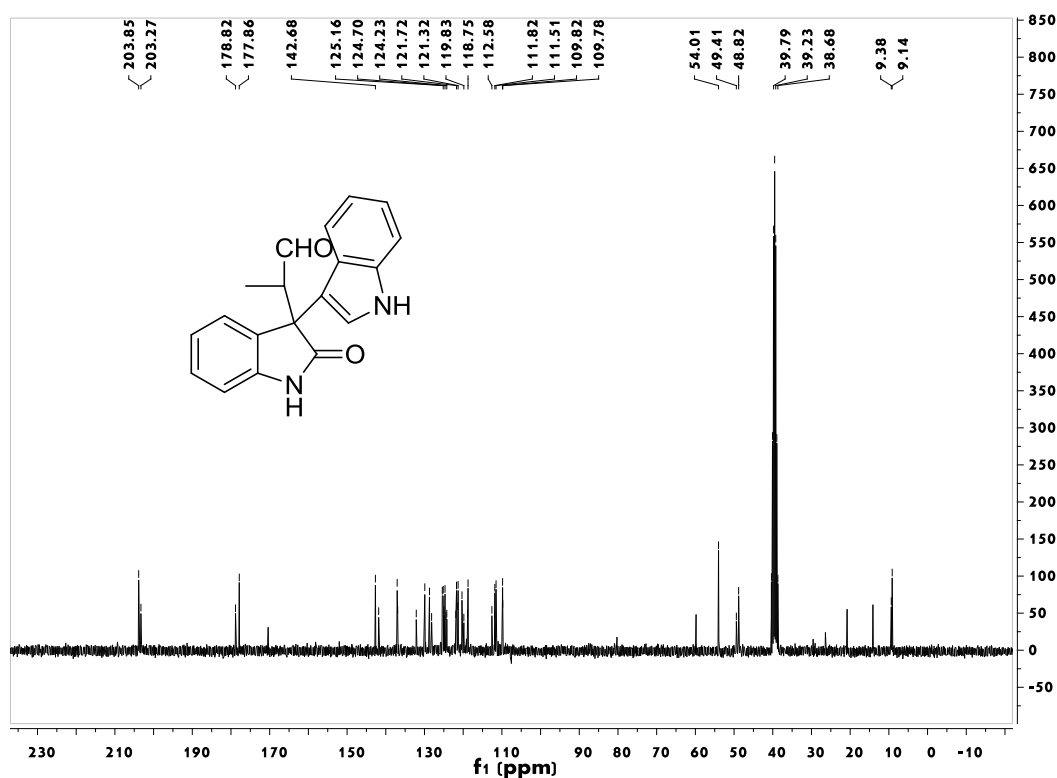



Electronic Supplementary Material (ESI) for Organic & Biomolecular Chemistry  
This journal is © The Royal Society of Chemistry 2012

### 2-(3-(1*H*-indol-3-yl)-2-oxoindolin-3-yl)butanal(3ac)

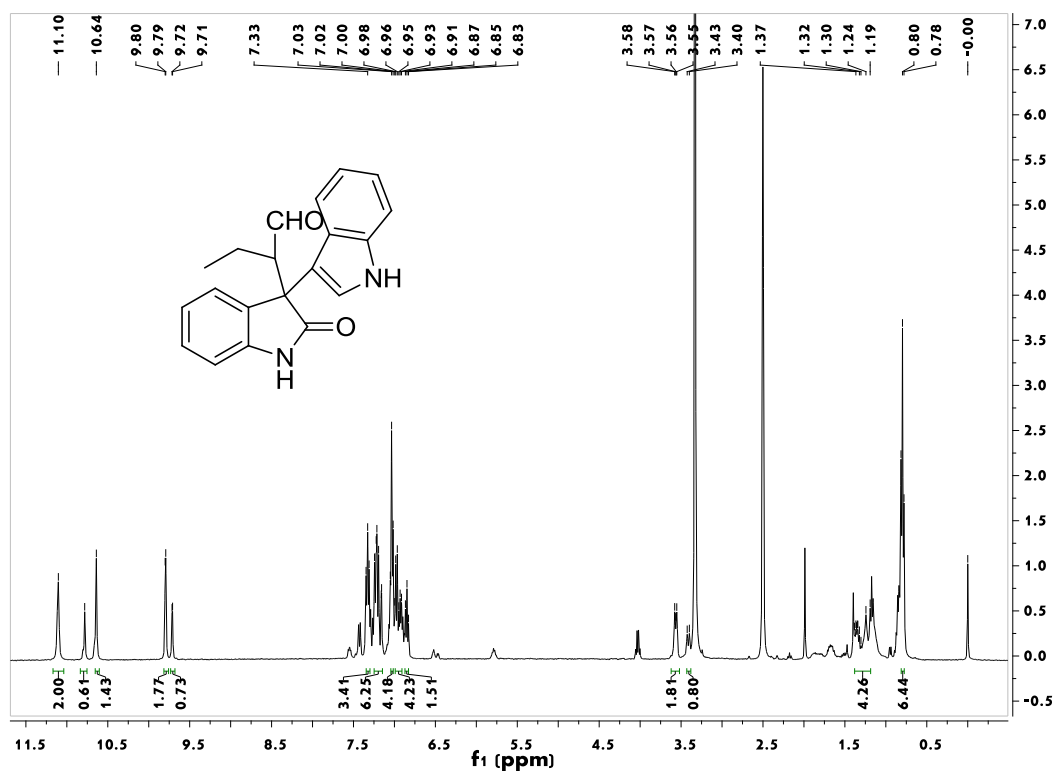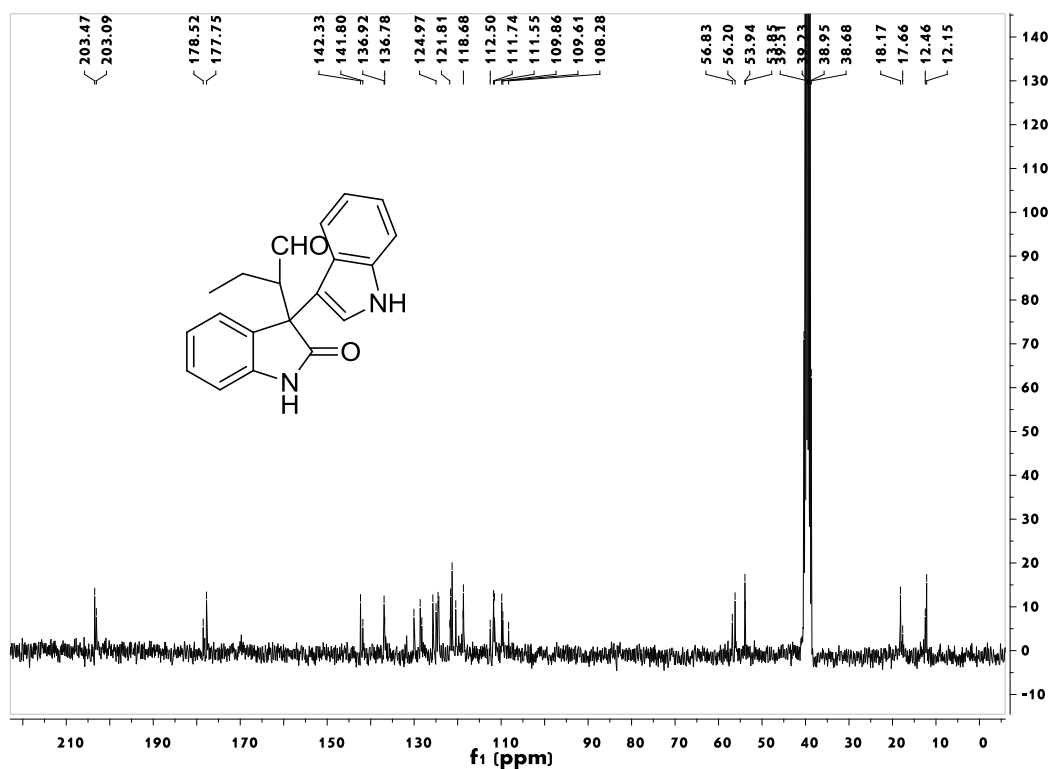

Electronic Supplementary Material (ESI) for Organic & Biomolecular Chemistry  
This journal is © The Royal Society of Chemistry 2012

2-(3-(1*H*-indol-3-yl)-2-oxoindolin-3-yl)-3-phenylpropanal(3ad)

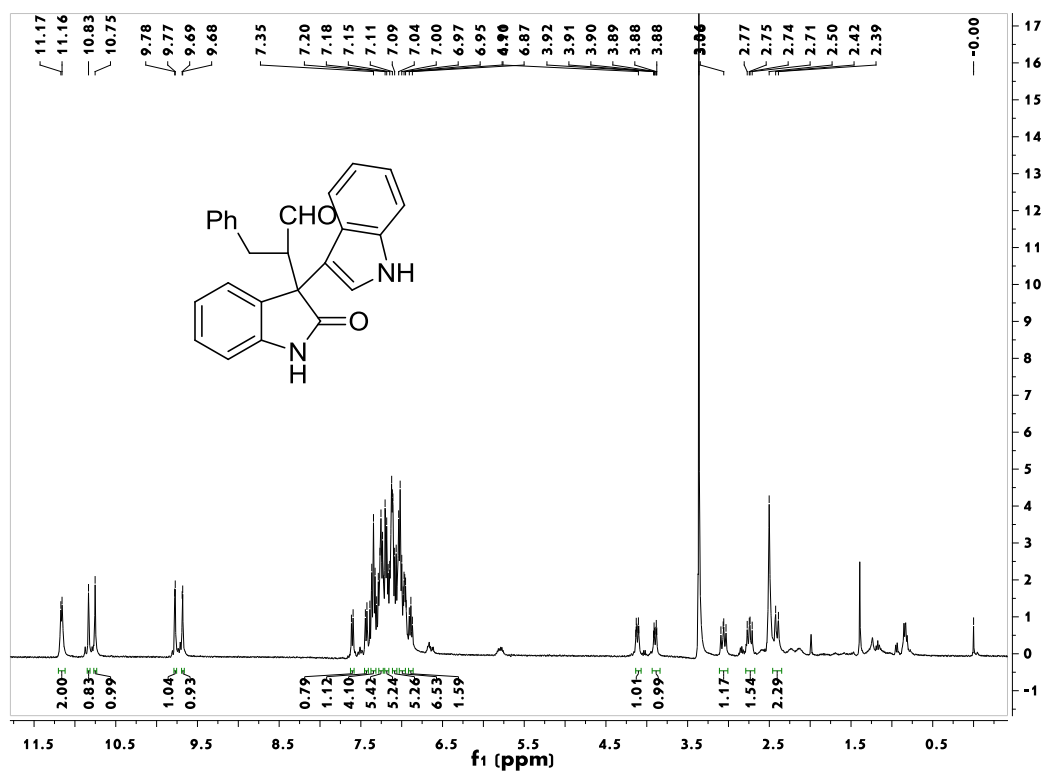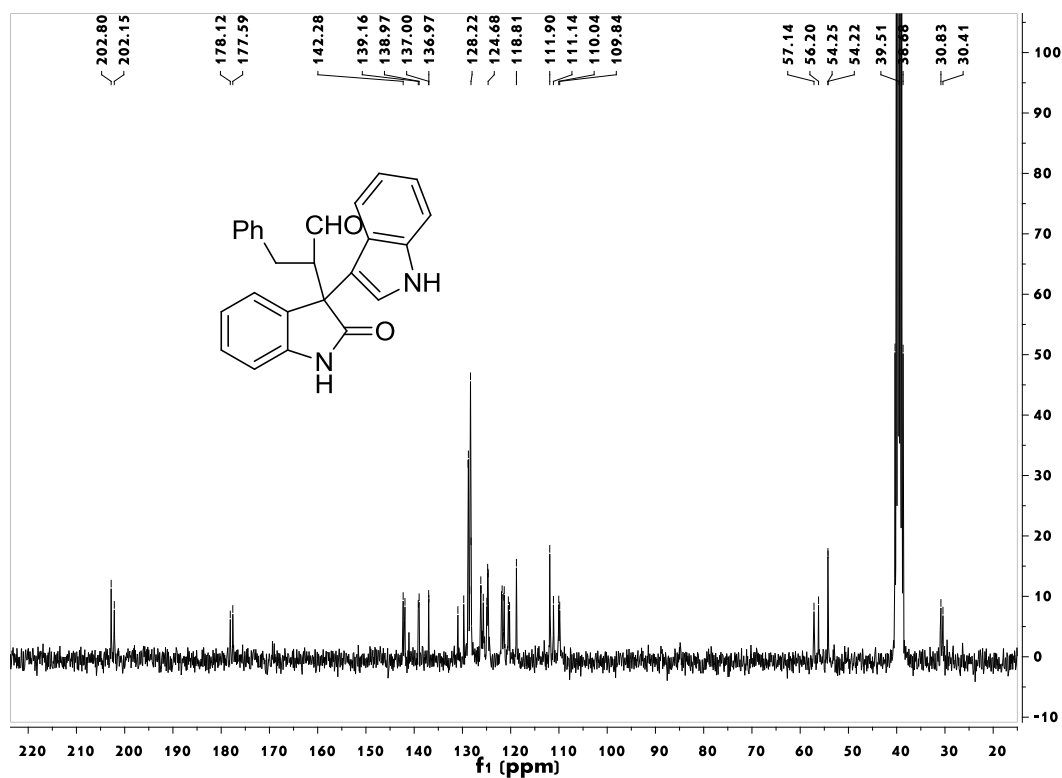

Electronic Supplementary Material (ESI) for Organic & Biomolecular Chemistry  
This journal is © The Royal Society of Chemistry 2012

### 2-(3-(5-bromo-1*H*-indol-3-yl)-2-oxoindolin-3-yl)propanal(3db)

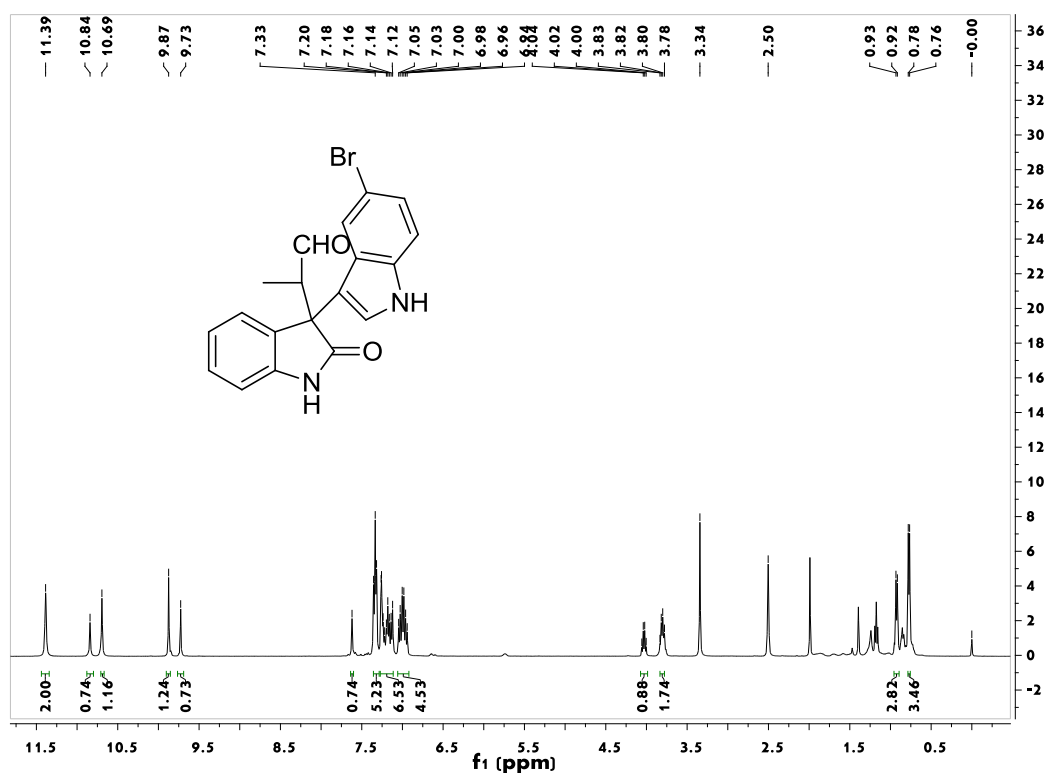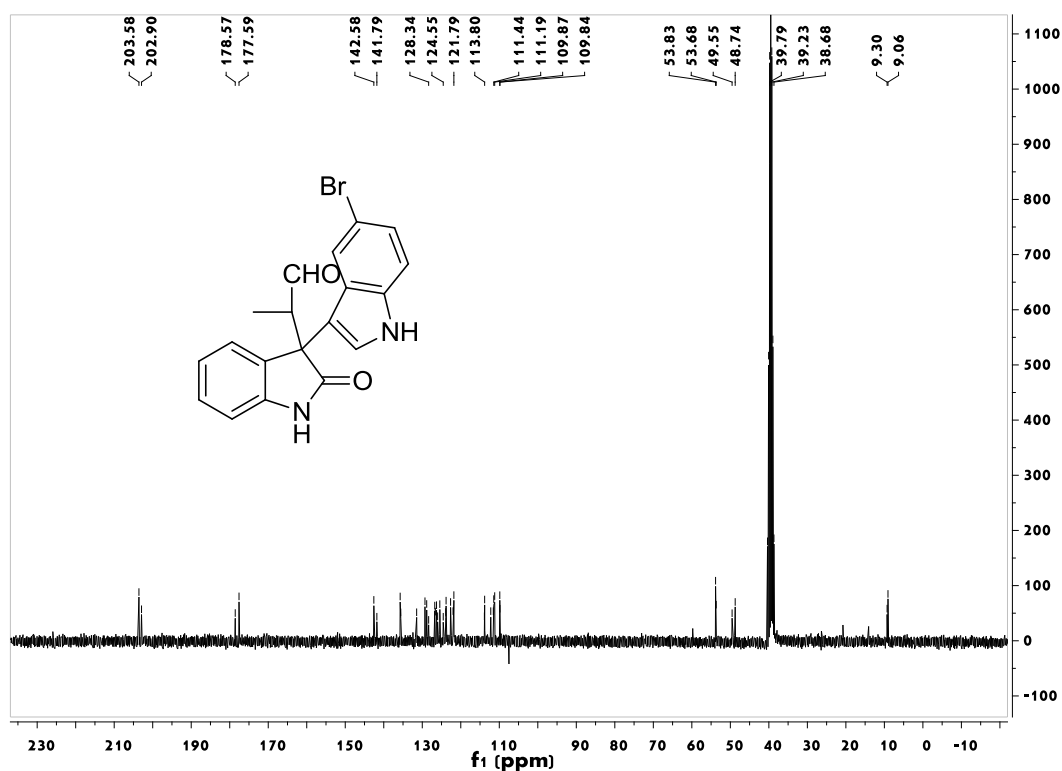

Electronic Supplementary Material (ESI) for Organic & Biomolecular Chemistry  
This journal is © The Royal Society of Chemistry 2012

### 2-(3-(5-bromo-1H-indol-3-yl)-2-oxoindolin-3-yl)butanal(3dc)

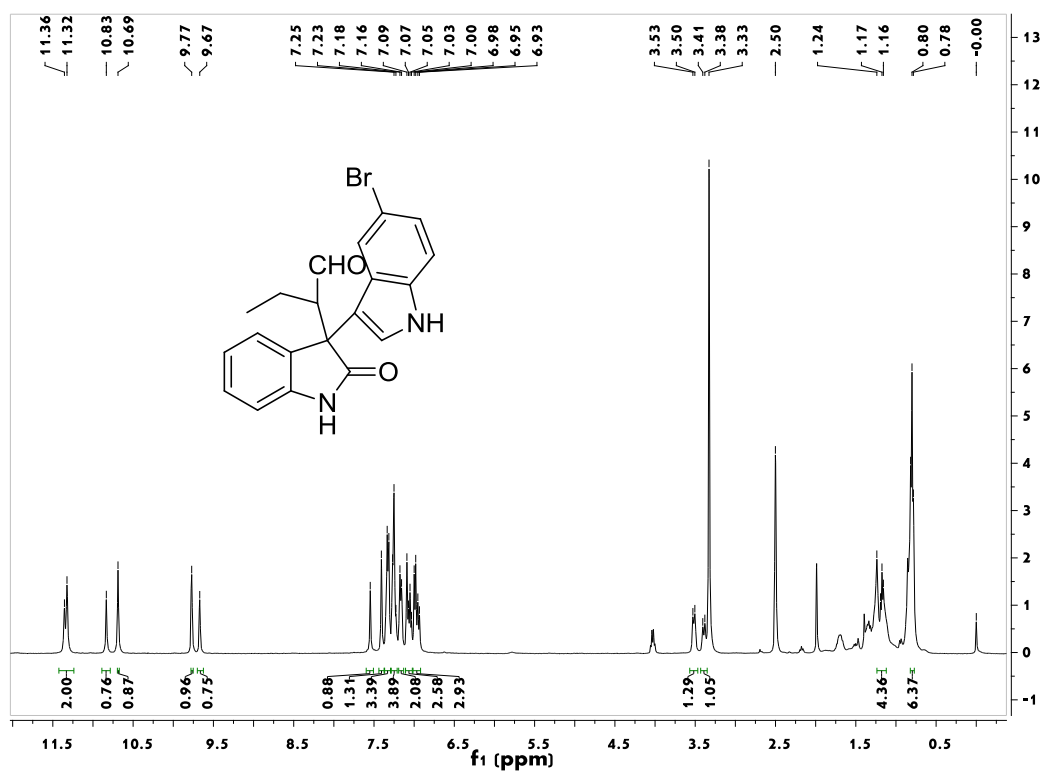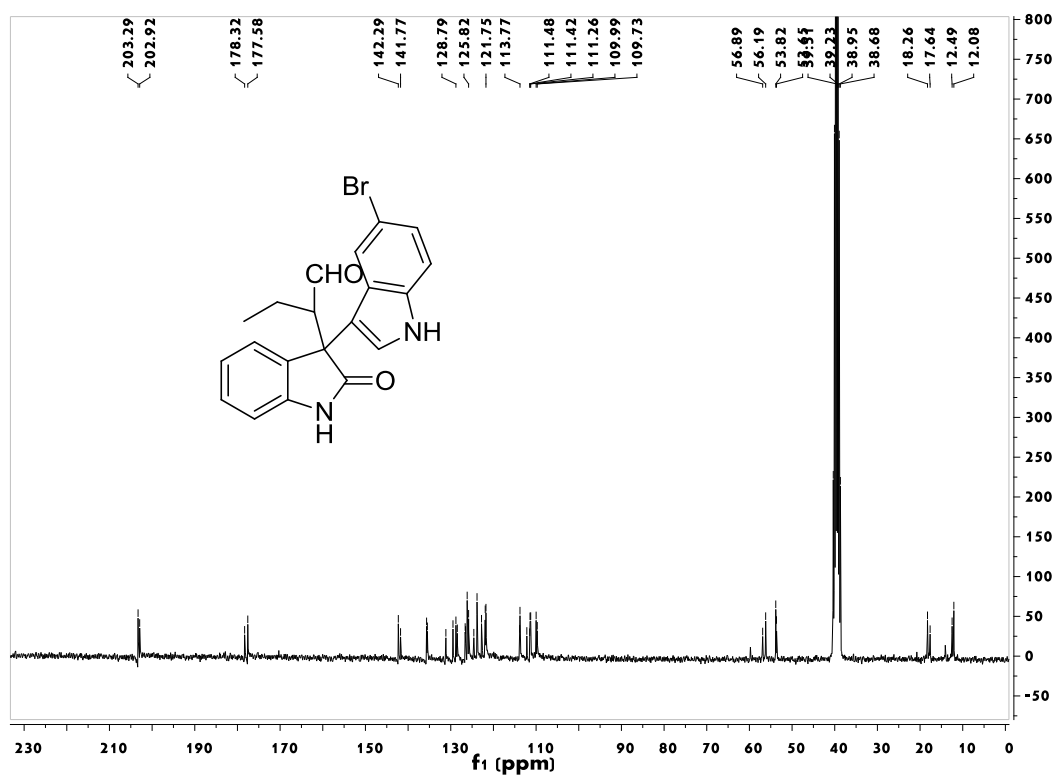

Electronic Supplementary Material (ESI) for Organic & Biomolecular Chemistry  
This journal is © The Royal Society of Chemistry 2012

### 2-(3-(7-methyl-1*H*-indol-3-yl)-2-oxoindolin-3-yl)propanal(3b)

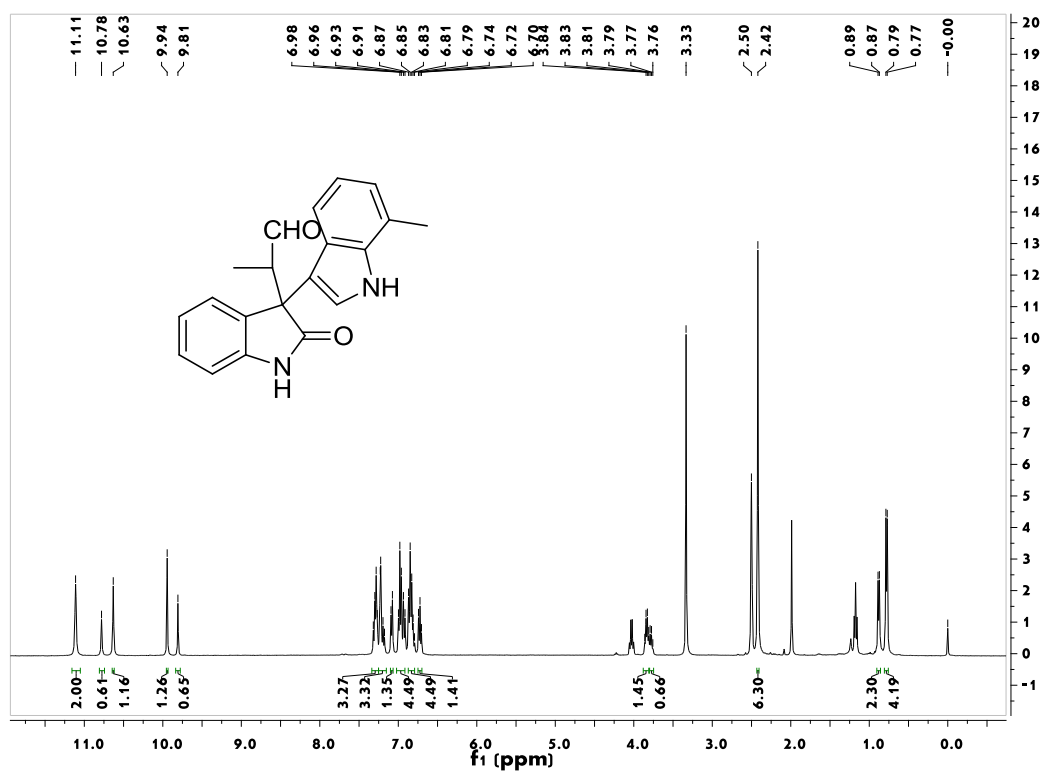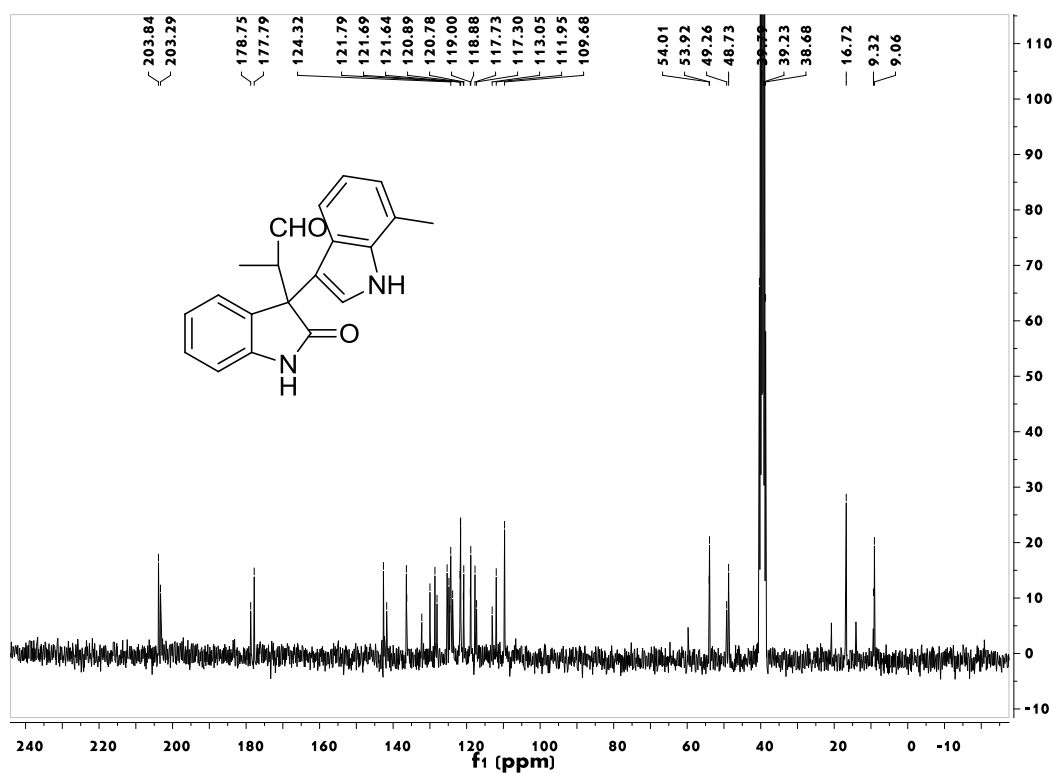

Electronic Supplementary Material (ESI) for Organic & Biomolecular Chemistry  
This journal is © The Royal Society of Chemistry 2012

2-(3-(7-methyl-1*H*-indol-3-yl)-2-oxoindolin-3-yl)butanal(3ec)

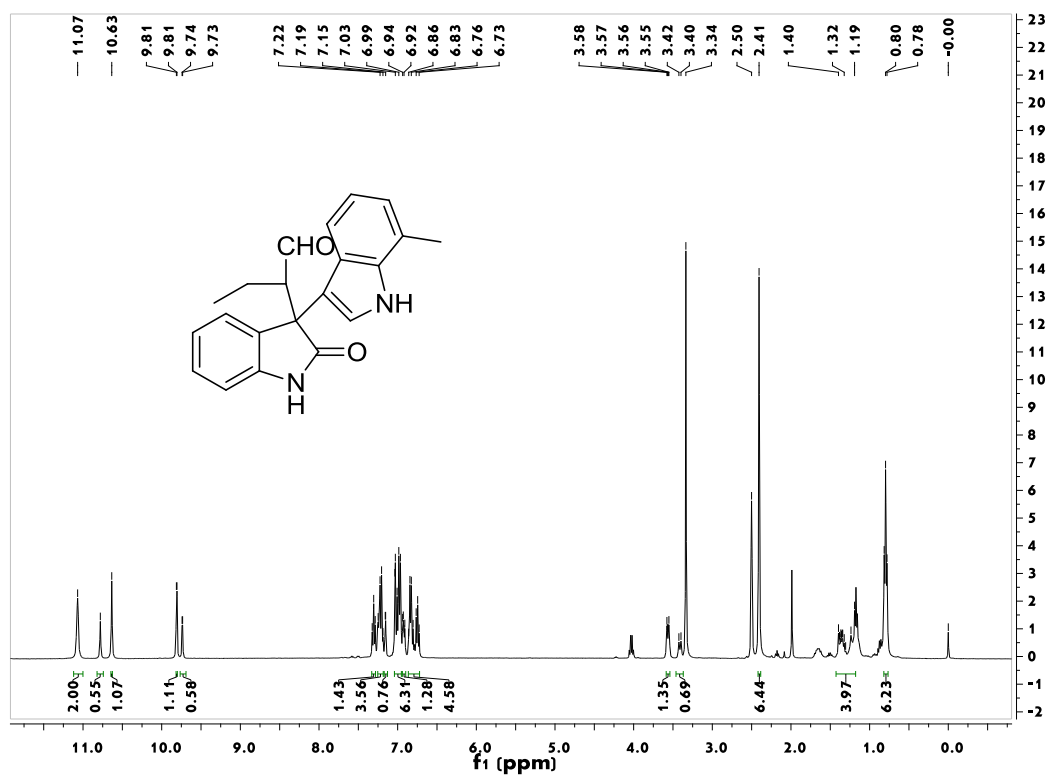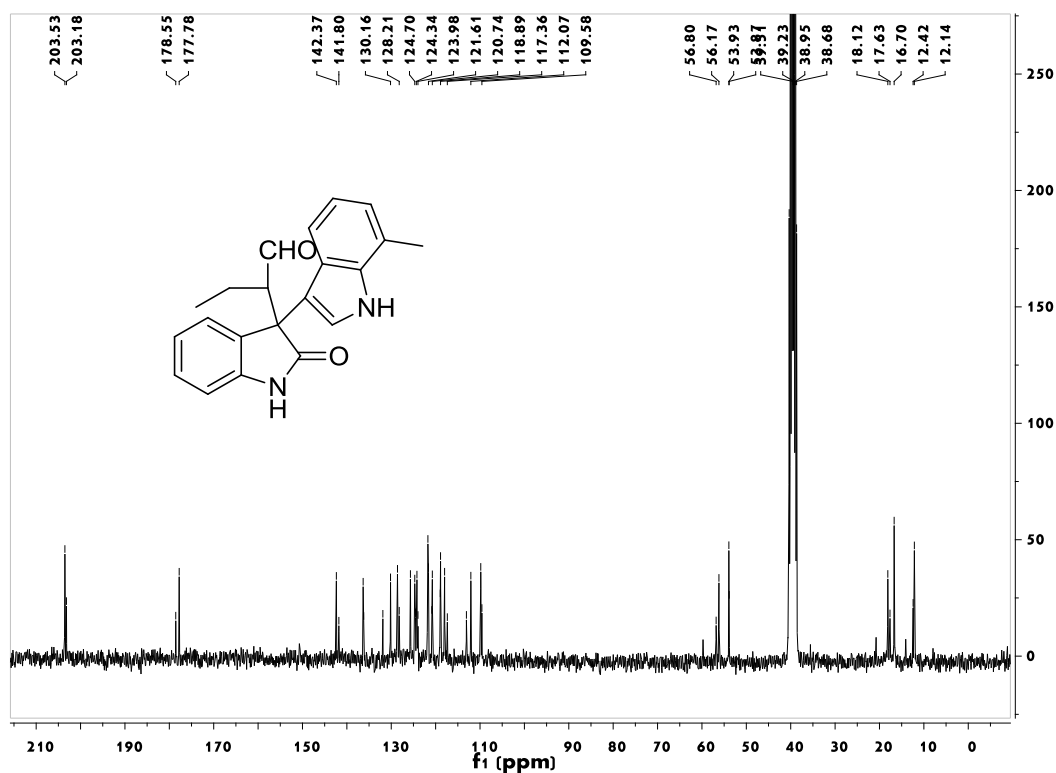

Electronic Supplementary Material (ESI) for Organic & Biomolecular Chemistry  
This journal is © The Royal Society of Chemistry 2012

### 2-(3-(7-methyl-1*H*-indol-3-yl)-2-oxoindolin-3-yl)-3-phenylpropanal(3ed)

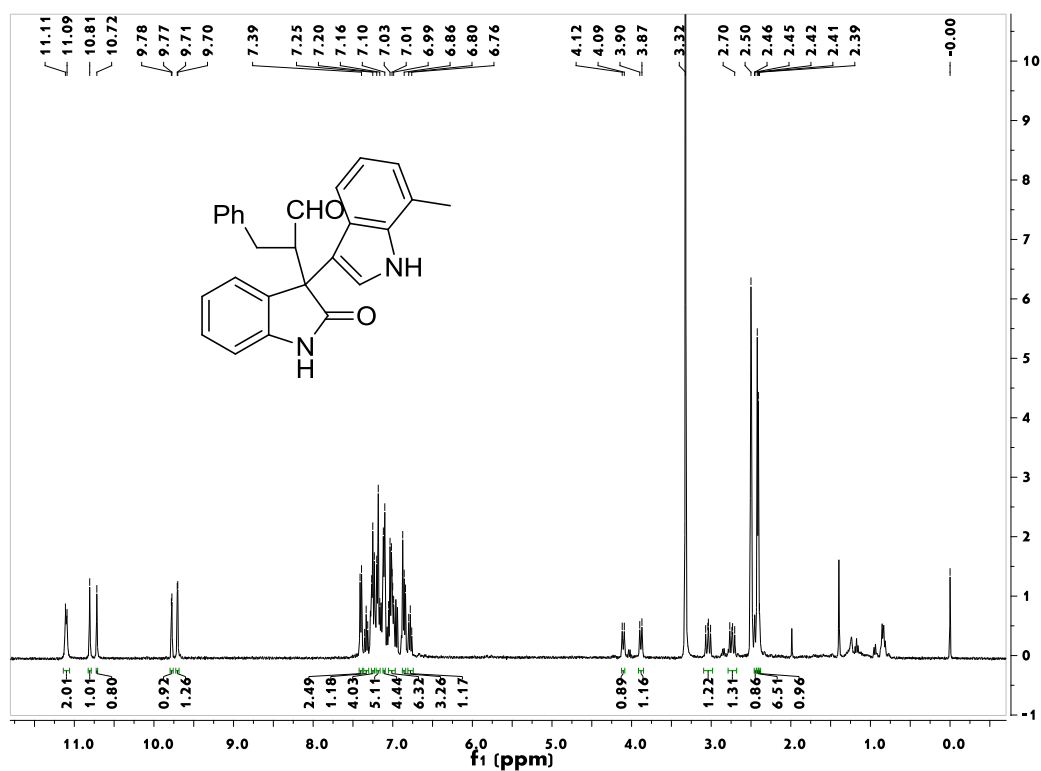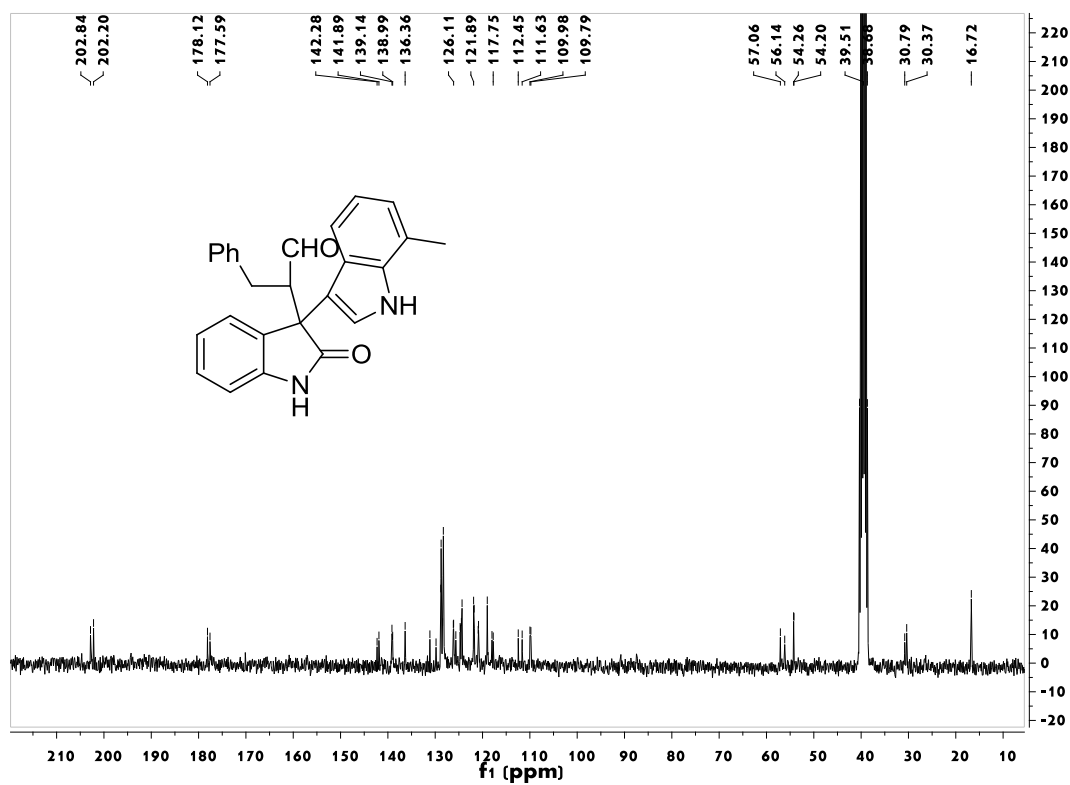

Electronic Supplementary Material (ESI) for Organic & Biomolecular Chemistry  
This journal is © The Royal Society of Chemistry 2012

### 2-(3-(1*H*-indol-3-yl)-1-methyl-2-oxindolin-3-yl)propanal(3fb)

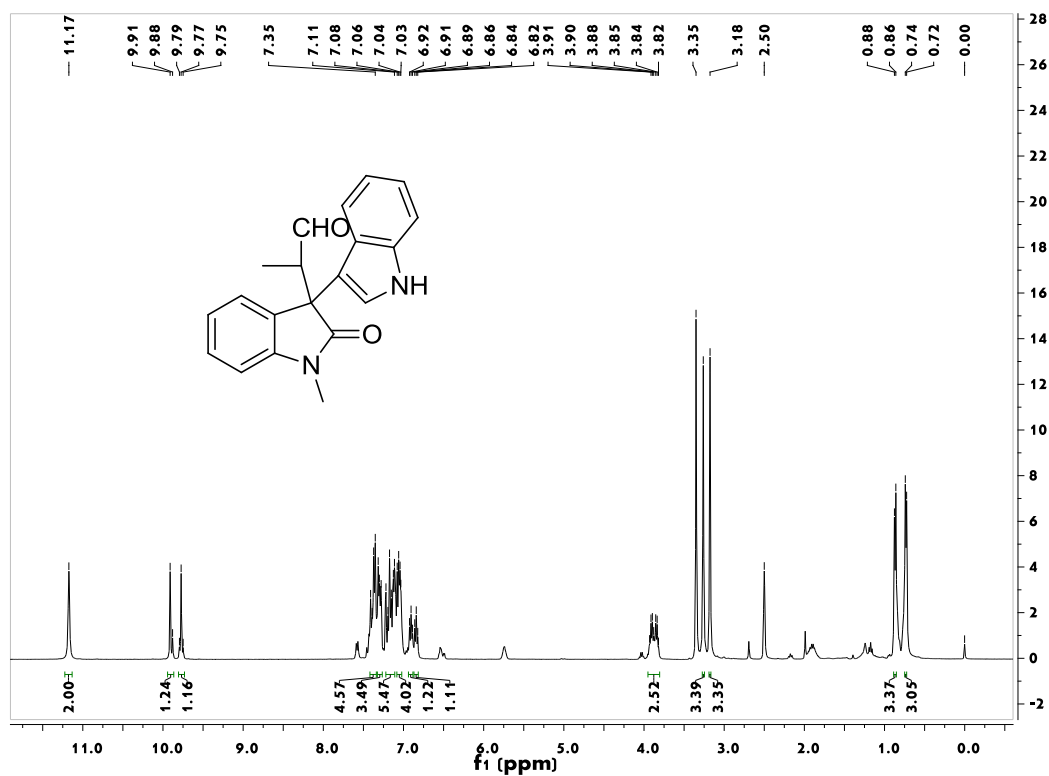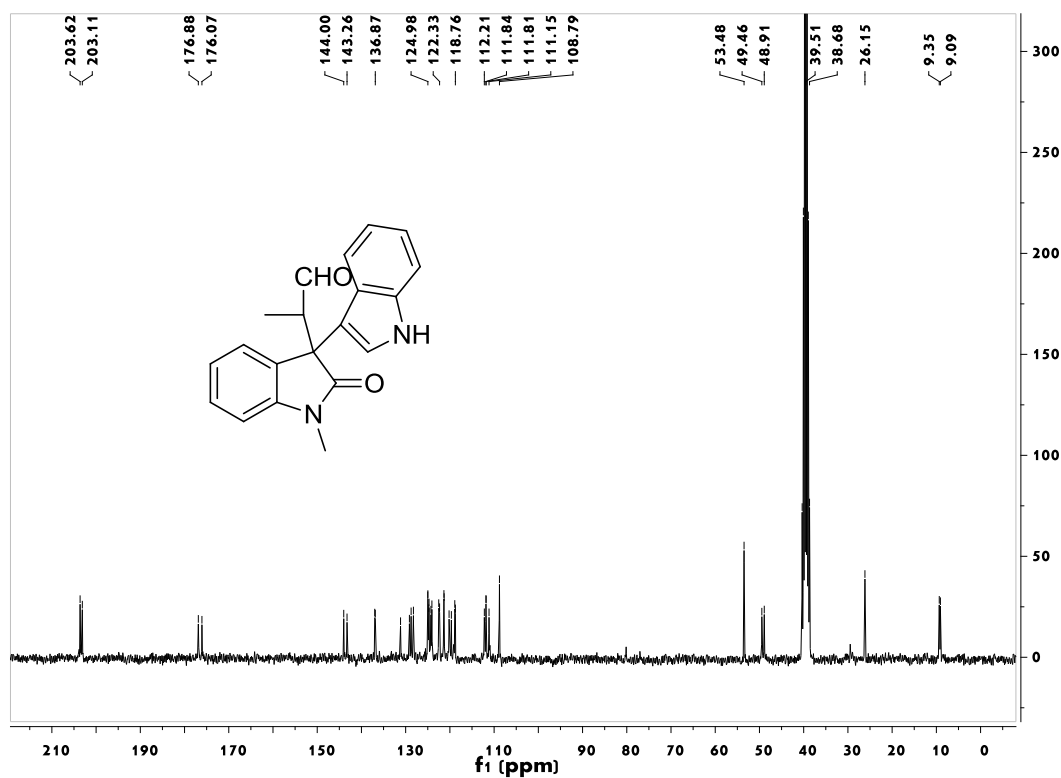



Electronic Supplementary Material (ESI) for Organic & Biomolecular Chemistry  
This journal is © The Royal Society of Chemistry 2012

**3-(1*H*-indol-3-yl)-1-methyl-3-(3-oxobutan-2-yl)indolin-2-one(*syn*-4fb)**

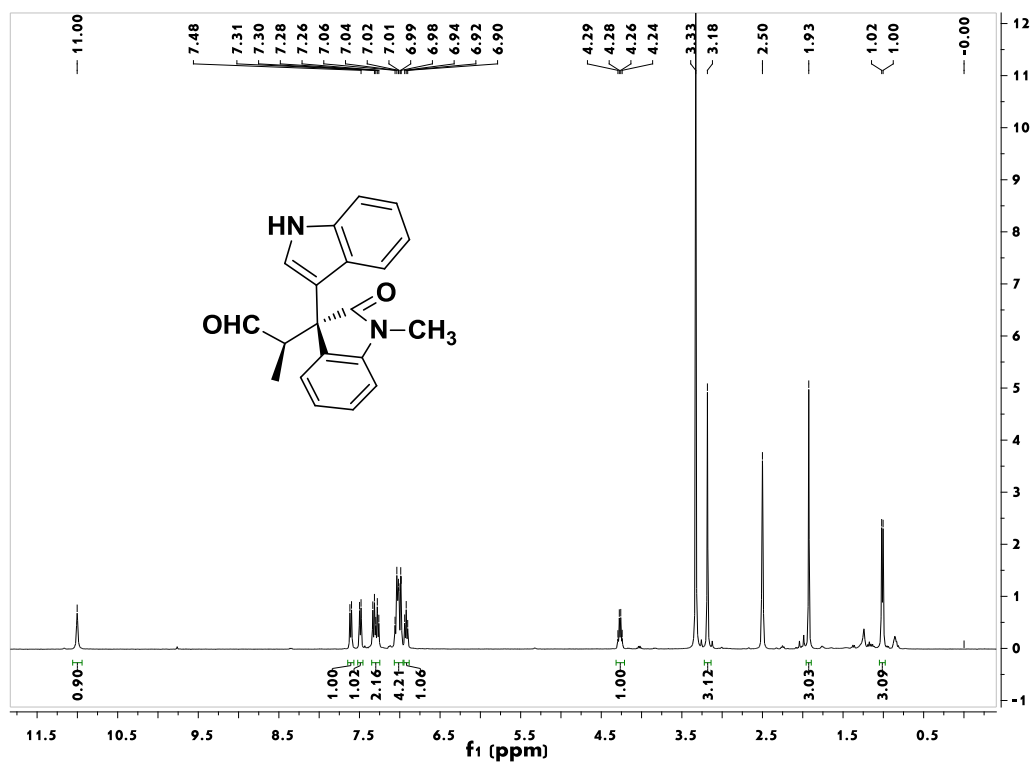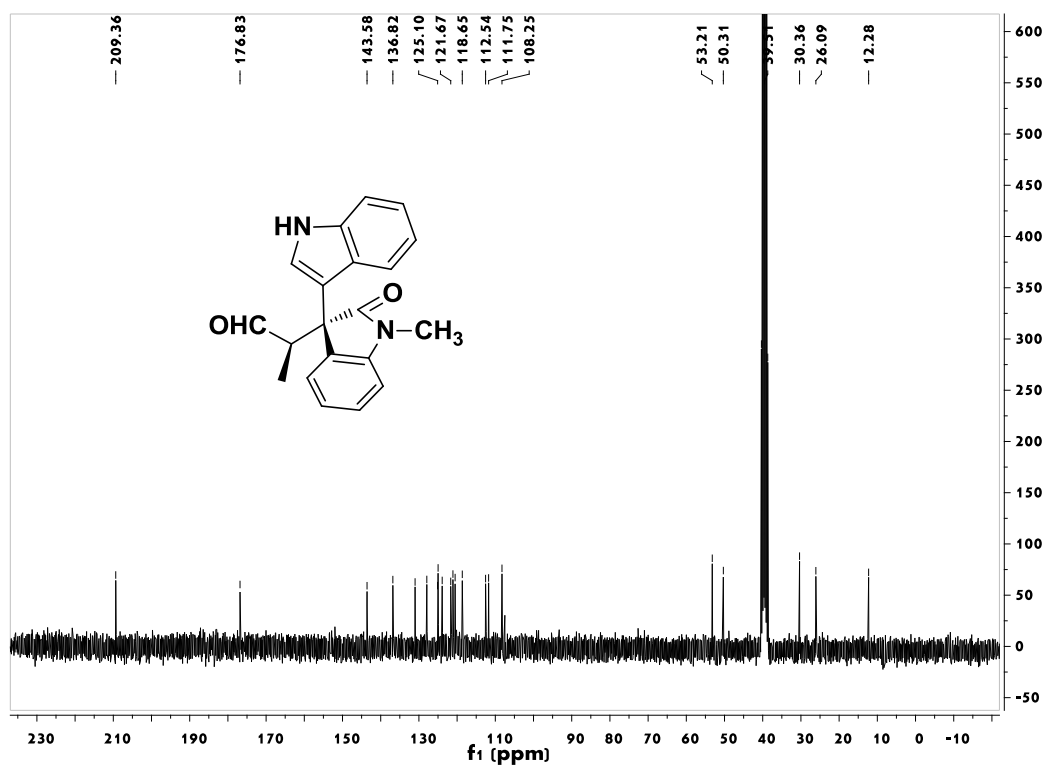

Electronic Supplementary Material (ESI) for Organic & Biomolecular Chemistry  
This journal is © The Royal Society of Chemistry 2012

**2-(3-(1*H*-indol-3-yl)-2-oxoindolin-3-yl)-2-phenylacetaldehyde(3ae)**

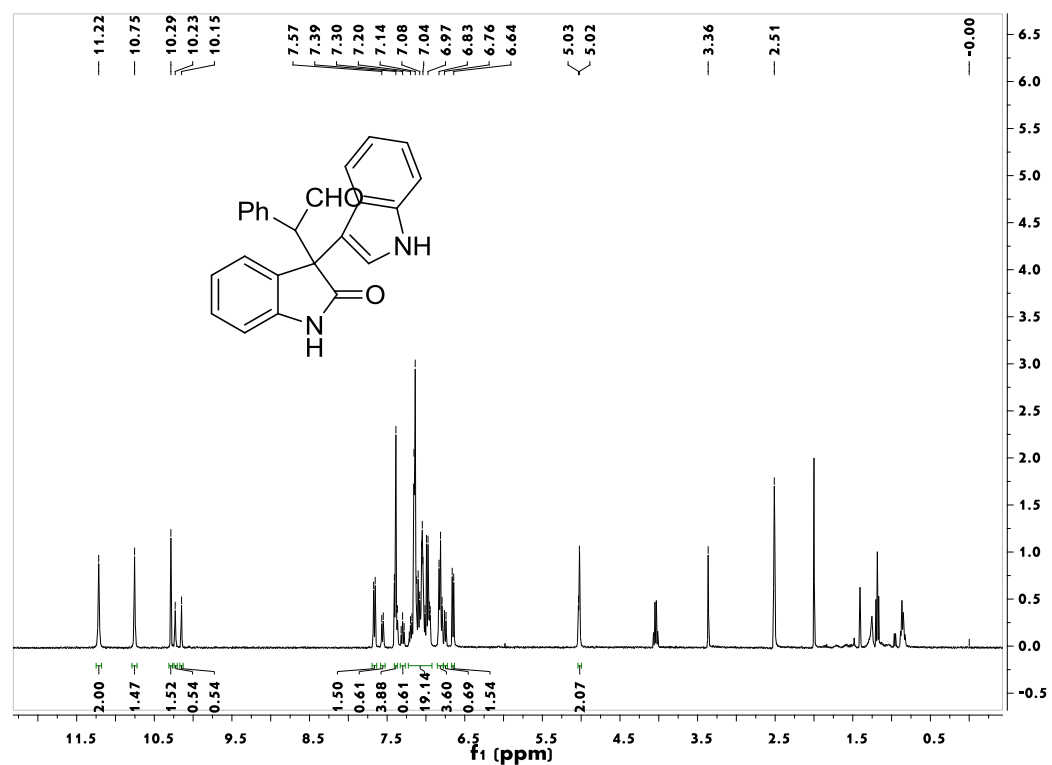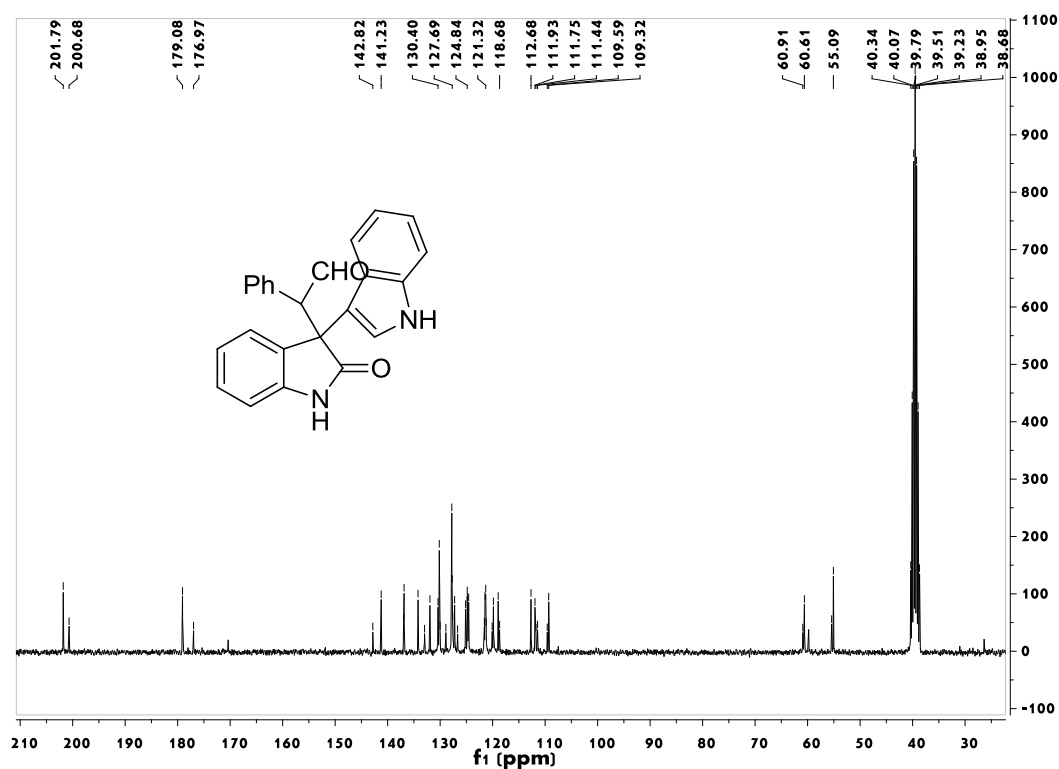

Electronic Supplementary Material (ESI) for Organic & Biomolecular Chemistry  
This journal is © The Royal Society of Chemistry 2012

### Copy of HPLC traces of products:

#### 2-(3-(1*H*-indol-3-yl)-2-oxoindolin-3-yl)octanal(3aa)

##### Racemic

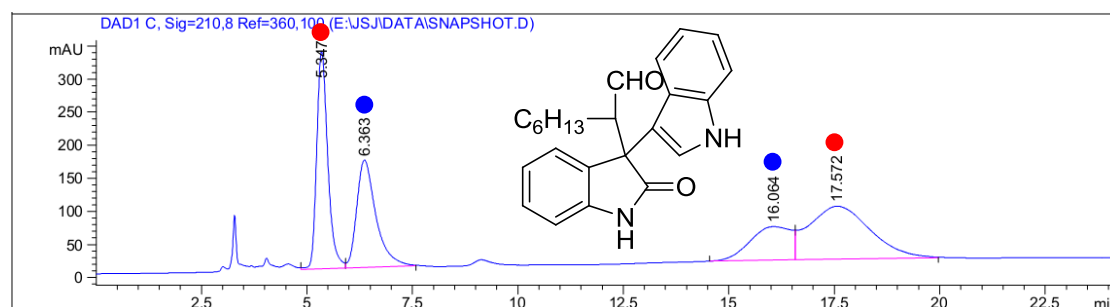

| Peak # | RetTime [min] | Type | Width [min] | Area [mAU*s] | Height [mAU] | Area %  |
|--------|---------------|------|-------------|--------------|--------------|---------|
| 1      | 5.347         | VV   | 0.2790      | 5999.84814   | 328.67184    | 26.4661 |
| 2      | 6.363         | VB   | 0.4726      | 5155.65869   | 162.32097    | 22.7423 |
| 3      | 16.064        | BV   | 1.0039      | 3435.99487   | 50.75169     | 15.1566 |
| 4      | 17.572        | VB   | 1.4275      | 8078.39600   | 80.04406     | 35.6349 |

##### Enantioselective

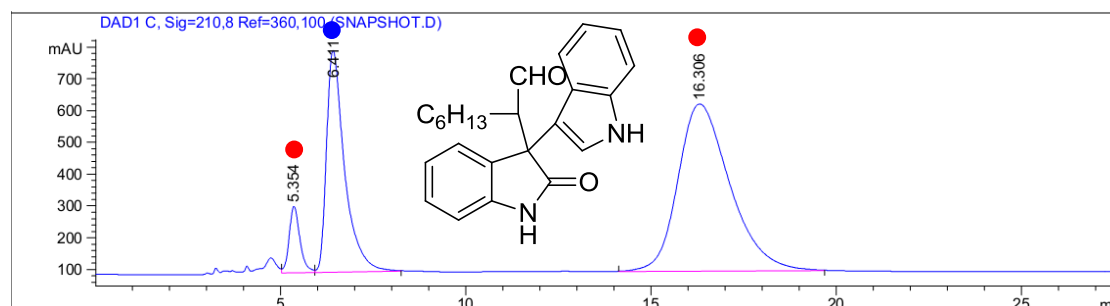

| Peak # | RetTime [min] | Type | Width [min] | Area [mAU*s] | Height [mAU] | Area %  |
|--------|---------------|------|-------------|--------------|--------------|---------|
| 1      | 5.354         | VV   | 0.3088      | 4282.81982   | 209.25627    | 5.4098  |
| 2      | 6.411         | VB   | 0.5057      | 2.36432e4    | 697.08380    | 29.8646 |
| 3      | 16.306        | BB   | 1.4470      | 5.12419e4    | 525.77747    | 64.7256 |

Electronic Supplementary Material (ESI) for Organic & Biomolecular Chemistry  
This journal is © The Royal Society of Chemistry 2012

## 2-(3-(5-methyl-1*H*-indol-3-yl)-2-oxindolin-3-yl)octanal(3ba)

### Racemic

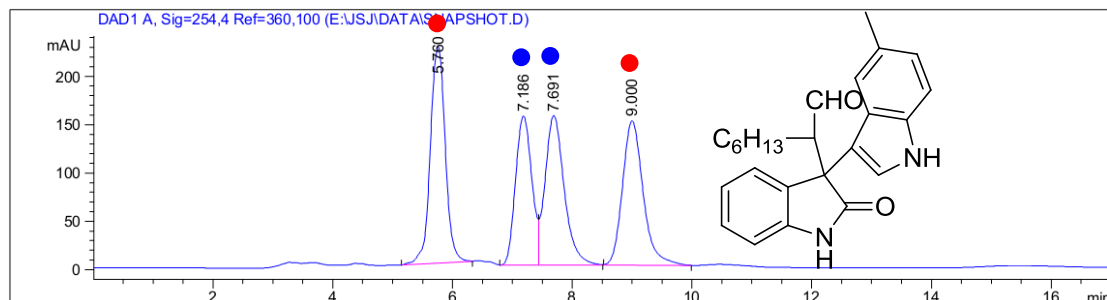

| Peak # | RetTime [min] | Type | Width [min] | Area [mAU*s] | Height [mAU] | Area %  |
|--------|---------------|------|-------------|--------------|--------------|---------|
| 1      | 5.760         | BB   | 0.2730      | 3893.28076   | 223.69867    | 28.1104 |
| 2      | 7.186         | BV   | 0.2967      | 2916.36353   | 154.16830    | 21.0568 |
| 3      | 7.691         | VB   | 0.3382      | 3453.00854   | 154.79851    | 24.9315 |
| 4      | 9.000         | BB   | 0.3681      | 3587.31445   | 149.42899    | 25.9012 |

### Enantioselective

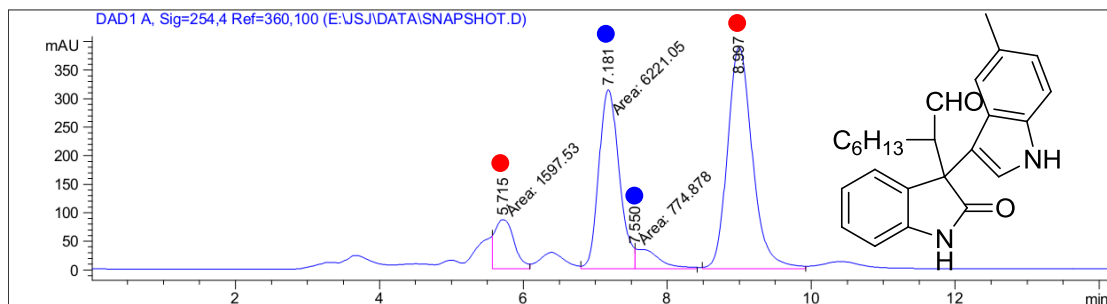

| Peak # | RetTime [min] | Type | Width [min] | Area [mAU*s] | Height [mAU] | Area %  |
|--------|---------------|------|-------------|--------------|--------------|---------|
| 1      | 5.715         | FM   | 0.3093      | 1597.52893   | 86.09654     | 8.9161  |
| 2      | 7.181         | MF   | 0.3305      | 6221.05127   | 313.74289    | 34.7208 |
| 3      | 7.550         | FM   | 0.3155      | 774.87799    | 35.57333     | 4.3247  |
| 4      | 8.997         | BB   | 0.3684      | 9323.89160   | 387.90668    | 52.0383 |

Electronic Supplementary Material (ESI) for Organic & Biomolecular Chemistry  
This journal is © The Royal Society of Chemistry 2012

## 2-(3-(5-methoxy-1*H*-indol-3-yl)-2-oxoindolin-3-yl)octanal(3ca)

### Racemic

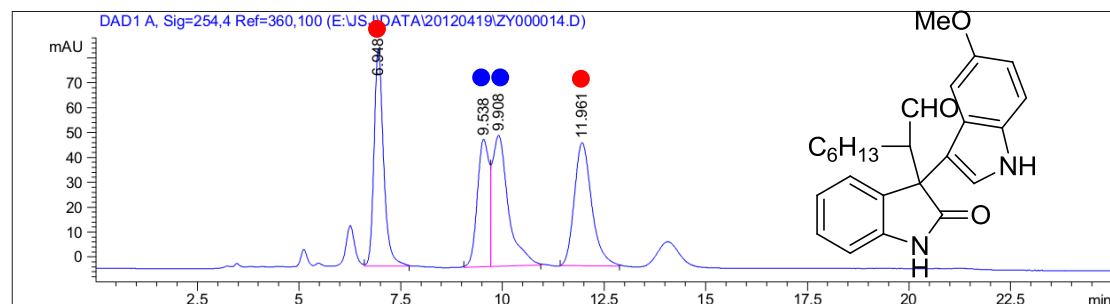

| Peak # | RetTime [min] | Type | Width [min] | Area [mAU*s] | Height [mAU] | Area %  |
|--------|---------------|------|-------------|--------------|--------------|---------|
| 1      | 6.948         | VB   | 0.2463      | 1424.59729   | 87.35886     | 26.5173 |
| 2      | 9.538         | BV   | 0.3025      | 1028.97412   | 51.18507     | 19.1532 |
| 3      | 9.908         | VB   | 0.3950      | 1439.75452   | 52.66087     | 26.7995 |
| 4      | 11.961        | BB   | 0.4563      | 1478.99988   | 49.53775     | 27.5300 |

### Enantioselective

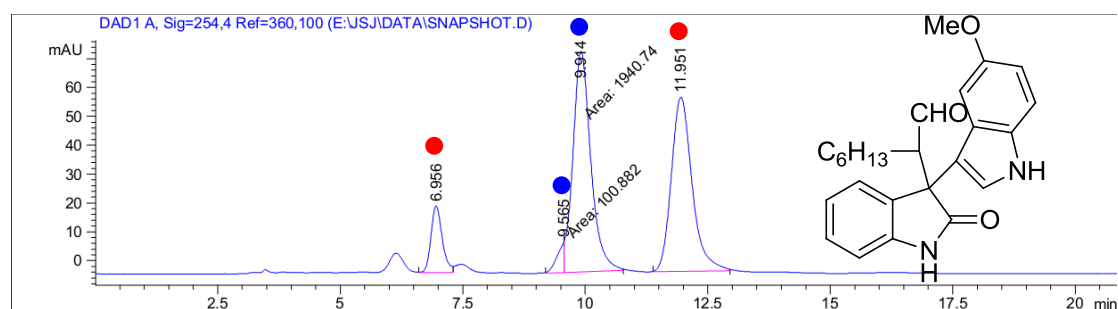

| Peak # | RetTime [min] | Type | Width [min] | Area [mAU*s] | Height [mAU] | Area %  |
|--------|---------------|------|-------------|--------------|--------------|---------|
| 1      | 6.956         | VV   | 0.2439      | 372.59503    | 23.13153     | 8.8828  |
| 2      | 9.565         | MF   | 0.1575      | 100.88232    | 10.67868     | 2.4051  |
| 3      | 9.914         | FM   | 0.4236      | 1940.73853   | 76.35420     | 46.2681 |
| 4      | 11.951        | BB   | 0.4502      | 1780.33289   | 60.34709     | 42.4440 |

Electronic Supplementary Material (ESI) for Organic & Biomolecular Chemistry  
This journal is © The Royal Society of Chemistry 2012

## 2-(3-(5-bromo-1*H*-indol-3-yl)-2-oxoindolin-3-yl)octanal(3da)

### Racemic

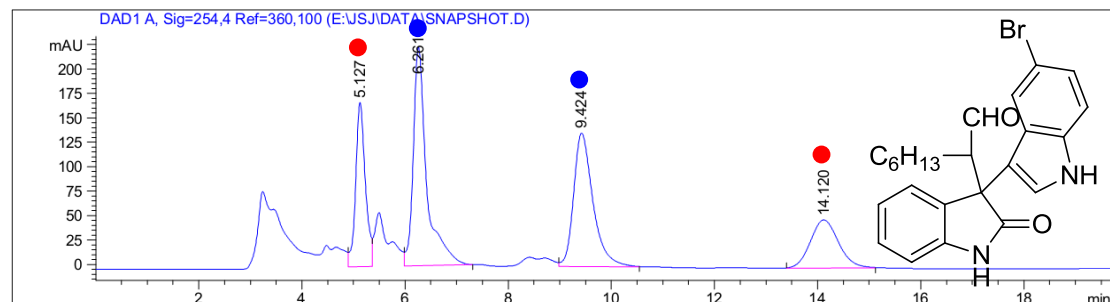

| Peak # | RetTime [min] | Type | Width [min] | Area [mAU*s] | Height [mAU] | Area %  |
|--------|---------------|------|-------------|--------------|--------------|---------|
| 1      | 5.127         | VV   | 0.1921      | 2192.88354   | 168.17247    | 18.7515 |
| 2      | 6.261         | VB   | 0.2636      | 4050.89331   | 223.32138    | 34.6394 |
| 3      | 9.424         | VB   | 0.3934      | 3576.42676   | 136.61198    | 30.5822 |
| 4      | 14.120        | BB   | 0.5872      | 1874.26453   | 49.33841     | 16.0269 |

### Enantioselective

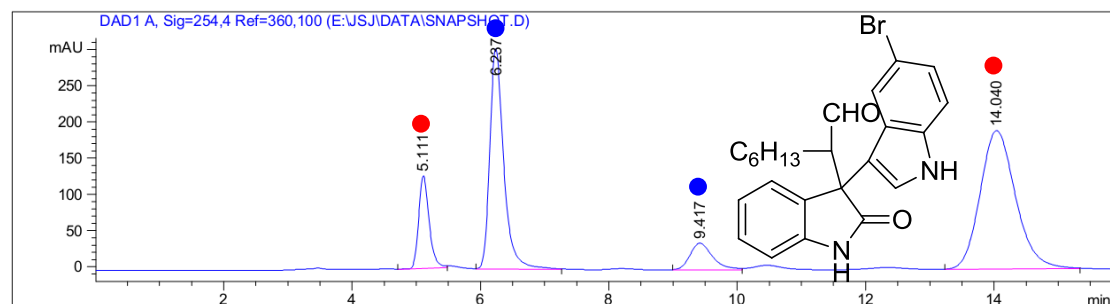

| Peak # | RetTime [min] | Type | Width [min] | Area [mAU*s] | Height [mAU] | Area %  |
|--------|---------------|------|-------------|--------------|--------------|---------|
| 1      | 5.111         | VB   | 0.1716      | 1442.86646   | 127.93773    | 10.1098 |
| 2      | 6.237         | BB   | 0.2281      | 4582.73584   | 303.61707    | 32.1101 |
| 3      | 9.417         | BB   | 0.3714      | 899.67859    | 36.77618     | 6.3038  |
| 4      | 14.040        | BB   | 0.5878      | 7346.66113   | 191.39357    | 51.4763 |

Electronic Supplementary Material (ESI) for Organic & Biomolecular Chemistry  
 This journal is © The Royal Society of Chemistry 2012

## 2-(3-(7-methyl-1*H*-indol-3-yl)-2-oxindolin-3-yl)octanal(3ea)

### Racemic

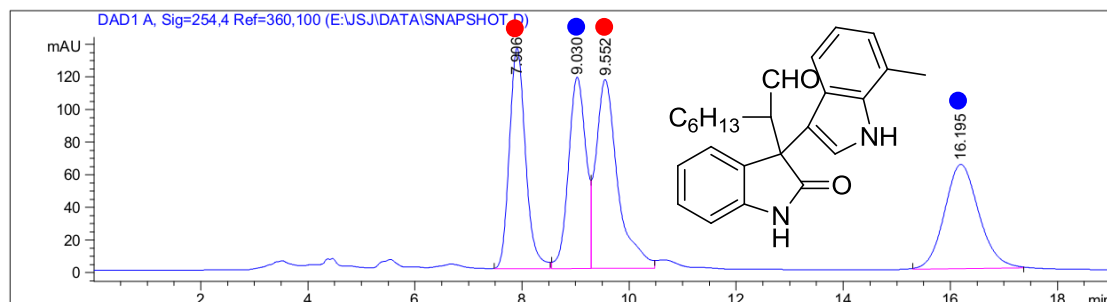

| Peak # | RetTime [min] | Type | Width [min] | Area [mAU*s] | Height [mAU] | Area %  |
|--------|---------------|------|-------------|--------------|--------------|---------|
| 1      | 7.906         | BB   | 0.3250      | 2840.98413   | 135.25902    | 24.4301 |
| 2      | 9.030         | BV   | 0.3456      | 2650.31763   | 117.31983    | 22.7906 |
| 3      | 9.552         | VB   | 0.4192      | 3289.88110   | 115.89556    | 28.2903 |
| 4      | 16.195        | BB   | 0.6838      | 2847.83594   | 63.91362     | 24.4890 |

### Enantioselective

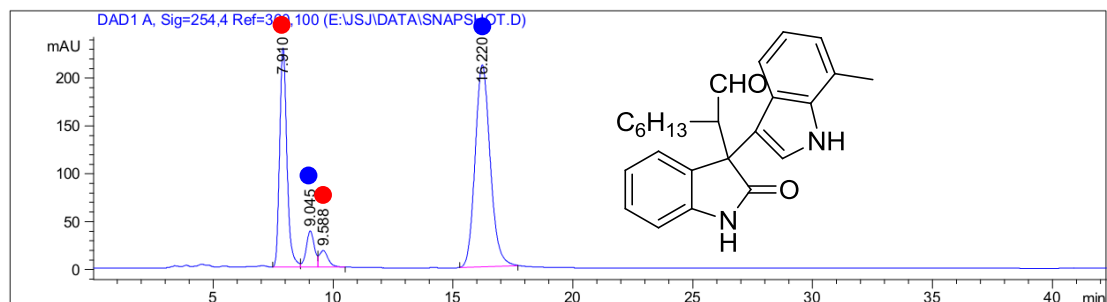

| Peak # | RetTime [min] | Type | Width [min] | Area [mAU*s] | Height [mAU] | Area %  |
|--------|---------------|------|-------------|--------------|--------------|---------|
| 1      | 7.910         | BV   | 0.3265      | 4839.09570   | 229.01445    | 31.2959 |
| 2      | 9.045         | VV   | 0.3633      | 900.18970    | 37.86856     | 5.8218  |
| 3      | 9.588         | VB   | 0.3864      | 448.24783    | 17.41086     | 2.8990  |
| 4      | 16.220        | BB   | 0.6763      | 9274.88086   | 211.22705    | 59.9834 |

Electronic Supplementary Material (ESI) for Organic & Biomolecular Chemistry  
This journal is © The Royal Society of Chemistry 2012

## 2-(3-(1*H*-indol-3-yl)-1-methyl-2-oxindolin-3-yl)octanal(3fa)

### Racemic

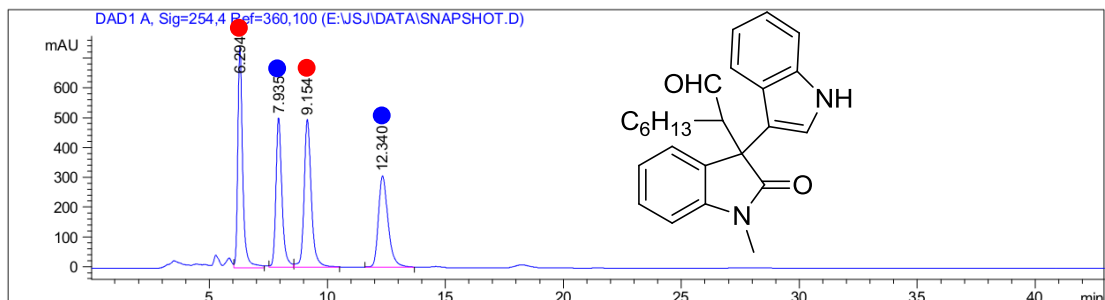

| Peak # | RetTime [min] | Type | Width [min] | Area [mAU*s] | Height [mAU] | Area %  |
|--------|---------------|------|-------------|--------------|--------------|---------|
| 1      | 6.294         | VB   | 0.2150      | 1.06020e4    | 740.56549    | 27.2920 |
| 2      | 7.935         | BV   | 0.2671      | 8921.90723   | 502.51572    | 22.9671 |
| 3      | 9.154         | VB   | 0.3202      | 1.05651e4    | 496.60941    | 27.1972 |
| 4      | 12.340        | BB   | 0.4333      | 8757.39941   | 306.51401    | 22.5437 |

### Enantioselective

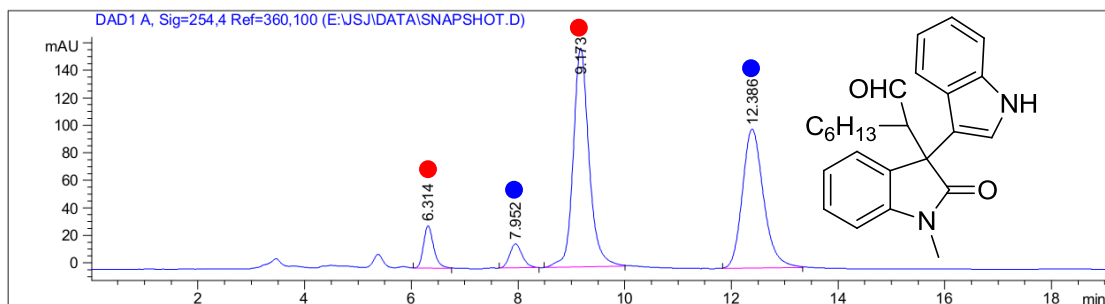

| Peak # | RetTime [min] | Type | Width [min] | Area [mAU*s] | Height [mAU] | Area %  |
|--------|---------------|------|-------------|--------------|--------------|---------|
| 1      | 6.314         | VB   | 0.2028      | 408.25650    | 30.77724     | 6.0435  |
| 2      | 7.952         | BB   | 0.2506      | 286.20203    | 17.52253     | 4.2367  |
| 3      | 9.173         | BB   | 0.3121      | 3274.63428   | 159.08882    | 48.4748 |
| 4      | 12.386        | BB   | 0.4213      | 2786.23535   | 101.15948    | 41.2450 |



Electronic Supplementary Material (ESI) for Organic & Biomolecular Chemistry  
This journal is © The Royal Society of Chemistry 2012

## 2-(5-bromo-3-(1*H*-indol-3-yl)-2-oxoindolin-3-yl)octanal(3ga)

### Racemic

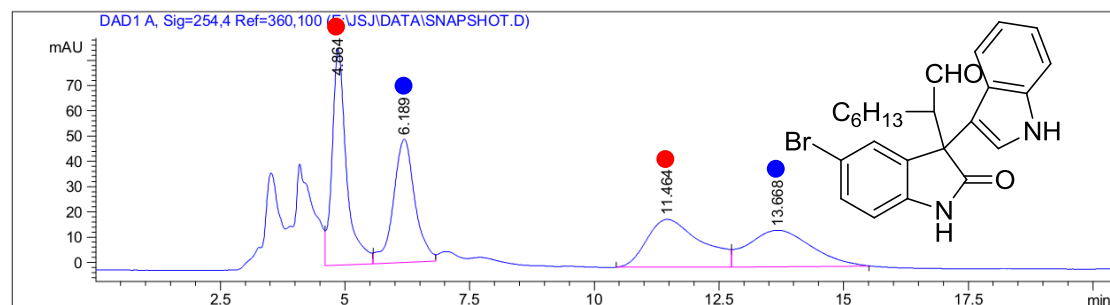

| Peak # | RetTime [min] | Type | Width [min] | Area [mAU*s] | Height [mAU] | Area %  |
|--------|---------------|------|-------------|--------------|--------------|---------|
| 1      | 4.864         | VB   | 0.2956      | 1714.41663   | 85.62328     | 29.0663 |
| 2      | 6.189         | BV   | 0.4531      | 1467.71619   | 48.76577     | 24.8837 |
| 3      | 11.464        | BV   | 1.0548      | 1432.60376   | 18.88880     | 24.2884 |
| 4      | 13.668        | VB   | 1.0625      | 1283.57031   | 14.44738     | 21.7617 |

### Enantioselective

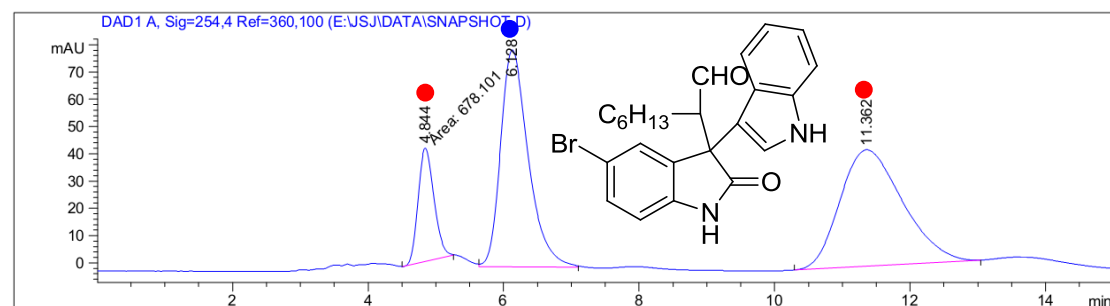

| Peak # | RetTime [min] | Type | Width [min] | Area [mAU*s] | Height [mAU] | Area %  |
|--------|---------------|------|-------------|--------------|--------------|---------|
| 1      | 4.844         | MM   | 0.2715      | 678.10138    | 41.62068     | 11.9540 |
| 2      | 6.128         | BB   | 0.4336      | 2259.77832   | 79.49682     | 39.8368 |
| 3      | 11.362        | BB   | 0.9836      | 2734.71069   | 42.67469     | 48.2092 |

Electronic Supplementary Material (ESI) for Organic & Biomolecular Chemistry  
This journal is © The Royal Society of Chemistry 2012

## 2-(5-chloro-3-(1*H*-indol-3-yl)-2-oxindolin-3-yl)octanal(3ha)

### Racemic

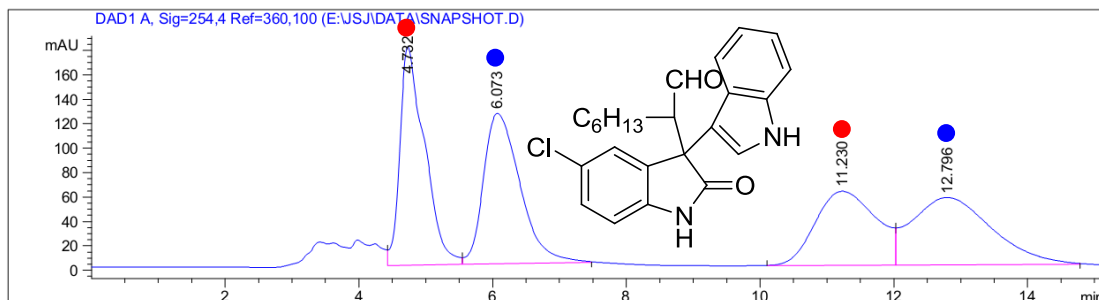

| Peak # | RetTime [min] | Type | Width [min] | Area [mAU*s] | Height [mAU] | Area %  |
|--------|---------------|------|-------------|--------------|--------------|---------|
| 1      | 4.732         | VV   | 0.3586      | 4606.39600   | 178.80412    | 25.9953 |
| 2      | 6.073         | VB   | 0.5974      | 4702.55225   | 123.17397    | 26.5379 |
| 3      | 11.230        | BV   | 0.9644      | 3844.07983   | 60.57000     | 21.6933 |
| 4      | 12.796        | VB   | 1.2054      | 4567.11328   | 55.07679     | 25.7736 |

### Enantioselective

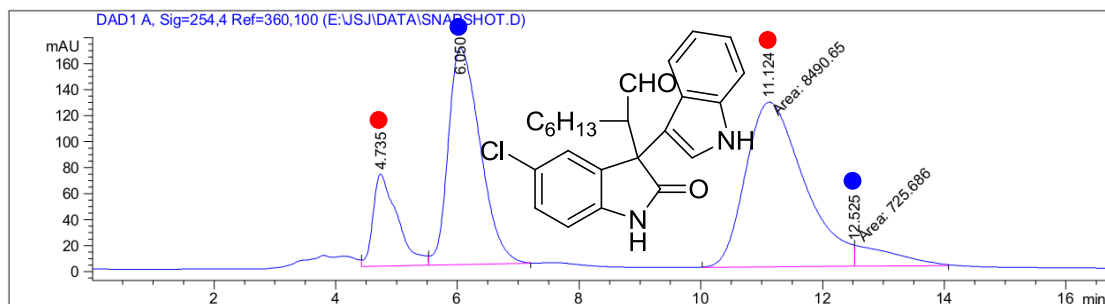

| Peak # | RetTime [min] | Type | Width [min] | Area [mAU*s] | Height [mAU] | Area %  |
|--------|---------------|------|-------------|--------------|--------------|---------|
| 1      | 4.735         | VB   | 0.3865      | 1985.65381   | 70.95663     | 11.4869 |
| 2      | 6.050         | BB   | 0.5820      | 6084.29297   | 166.62265    | 35.1972 |
| 3      | 11.124        | MF   | 1.1179      | 8490.64648   | 126.58896    | 49.1178 |
| 4      | 12.525        | FM   | 0.7522      | 725.68567    | 16.07951     | 4.1980  |

Electronic Supplementary Material (ESI) for Organic & Biomolecular Chemistry  
This journal is © The Royal Society of Chemistry 2012

## 2-(3-(1*H*-indol-3-yl)-2-oxoindolin-3-yl)propanal(3ab)

### Racemic

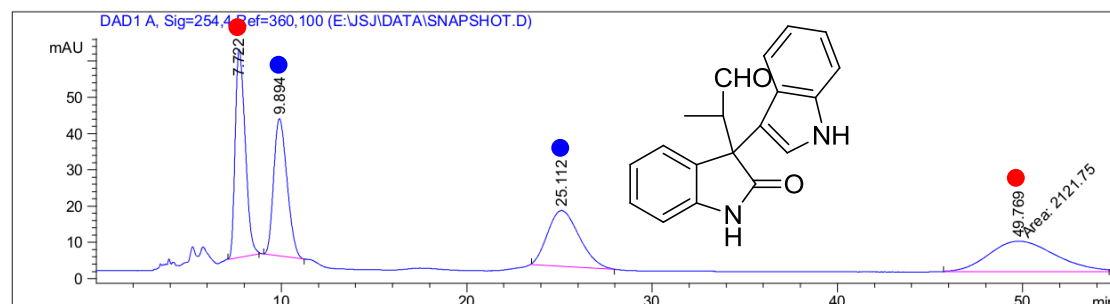

| Peak # | RetTime [min] | Type | Width [min] | Area [mAU*s] | Height [mAU] | Area %  |
|--------|---------------|------|-------------|--------------|--------------|---------|
| 1      | 7.722         | BB   | 0.5990      | 2150.32690   | 57.40340     | 26.9017 |
| 2      | 9.894         | BB   | 0.7797      | 1901.24719   | 37.87059     | 23.7856 |
| 3      | 25.112        | BB   | 1.3993      | 1819.93774   | 15.37159     | 22.7684 |
| 4      | 49.769        | MM   | 4.1674      | 2121.75171   | 8.48561      | 26.5442 |

### Enantioselective

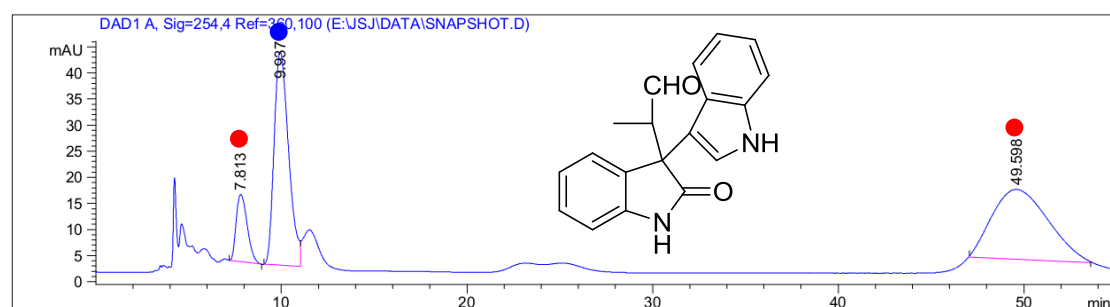

| Peak # | RetTime [min] | Type | Width [min] | Area [mAU*s] | Height [mAU] | Area %  |
|--------|---------------|------|-------------|--------------|--------------|---------|
| 1      | 7.813         | BB   | 0.6508      | 531.85730    | 12.85209     | 9.5836  |
| 2      | 9.937         | BV   | 0.8292      | 2214.89209   | 40.80659     | 39.9102 |
| 3      | 49.598        | BB   | 2.4548      | 2802.93970   | 13.36471     | 50.5062 |

Electronic Supplementary Material (ESI) for Organic & Biomolecular Chemistry  
This journal is © The Royal Society of Chemistry 2012

## 2-(3-(1*H*-indol-3-yl)-2-oxoindolin-3-yl)butanal(3ac)

### Racemic

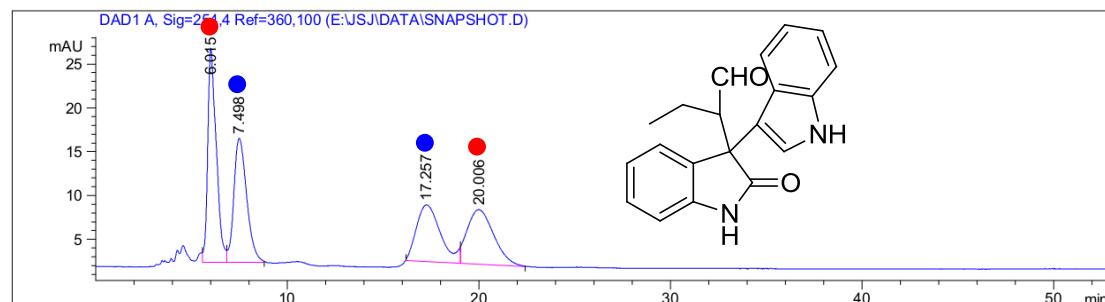

| Peak # | RetTime [min] | Type | Width [min] | Area [mAU*s] | Height [mAU] | Area %  |
|--------|---------------|------|-------------|--------------|--------------|---------|
| 1      | 6.015         | BB   | 0.4397      | 757.13043    | 24.41899     | 29.3812 |
| 2      | 7.498         | BB   | 0.6970      | 658.34839    | 14.14393     | 25.5479 |
| 3      | 17.257        | BB   | 1.0341      | 565.59155    | 6.45568      | 21.9484 |
| 4      | 20.006        | BB   | 1.1327      | 595.84668    | 6.21374      | 23.1225 |

### Enantioselective

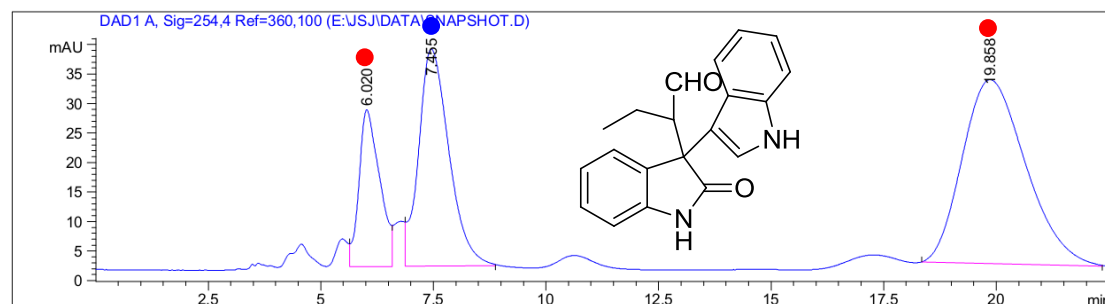

| Peak # | RetTime [min] | Type | Width [min] | Area [mAU*s] | Height [mAU] | Area %  |
|--------|---------------|------|-------------|--------------|--------------|---------|
| 1      | 6.020         | VV   | 0.4571      | 851.38336    | 26.62210     | 15.1114 |
| 2      | 7.455         | BB   | 0.7101      | 1728.08960   | 36.78675     | 30.6722 |
| 3      | 19.858        | BB   | 1.3862      | 3054.58032   | 31.20064     | 54.2164 |

Electronic Supplementary Material (ESI) for Organic & Biomolecular Chemistry  
This journal is © The Royal Society of Chemistry 2012

## 2-(3-(1*H*-indol-3-yl)-2-oxoindolin-3-yl)-3-phenylpropanal(3ad)

### Racemic

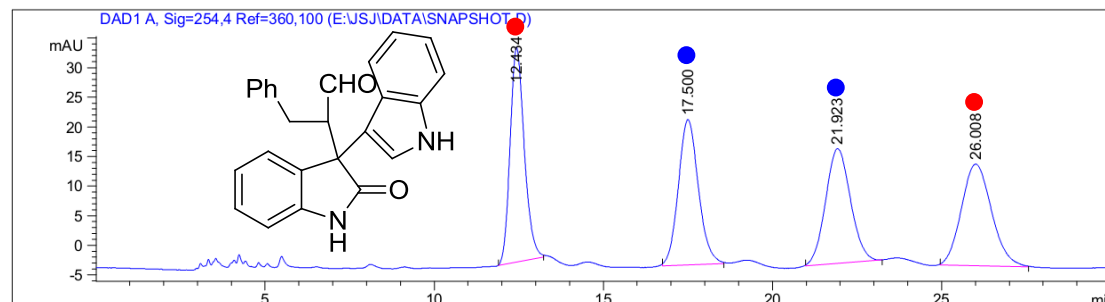

| Peak # | RetTime [min] | Type | Width [min] | Area [mAU*s] | Height [mAU] | Area %  |
|--------|---------------|------|-------------|--------------|--------------|---------|
| 1      | 12.434        | BB   | 0.4502      | 1057.51294   | 36.26501     | 25.6565 |
| 2      | 17.500        | BB   | 0.6301      | 1010.57288   | 24.55861     | 24.5177 |
| 3      | 21.923        | BB   | 0.7627      | 991.64905    | 19.38980     | 24.0585 |
| 4      | 26.008        | BB   | 0.9342      | 1062.08154   | 17.15685     | 25.7673 |

### Enantioselective

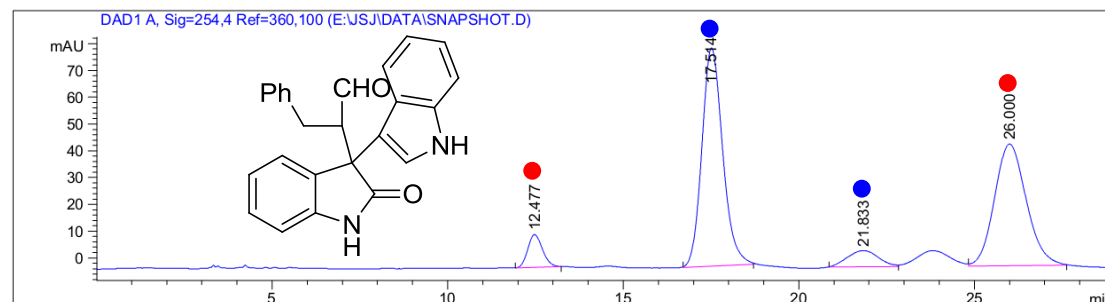

| Peak # | RetTime [min] | Type | Width [min] | Area [mAU*s] | Height [mAU] | Area %  |
|--------|---------------|------|-------------|--------------|--------------|---------|
| 1      | 12.477        | BB   | 0.4491      | 359.01813    | 12.28032     | 5.1627  |
| 2      | 17.514        | BB   | 0.6307      | 3355.77173   | 81.43875     | 48.2566 |
| 3      | 21.833        | BV   | 0.7322      | 375.07544    | 6.07620      | 5.3937  |
| 4      | 26.000        | VB   | 0.9576      | 2864.14771   | 45.42830     | 41.1870 |

Electronic Supplementary Material (ESI) for Organic & Biomolecular Chemistry  
This journal is © The Royal Society of Chemistry 2012

## 2-(3-(5-bromo-1*H*-indol-3-yl)-2-oxoindolin-3-yl)propanal(3db)

Racemic

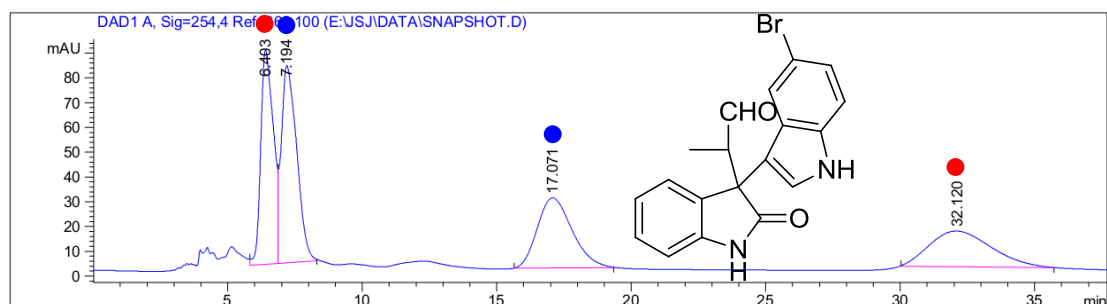

| Peak # | RetTime [min] | Type | Width [min] | Area [mAU*s] | Height [mAU] | Area %  |
|--------|---------------|------|-------------|--------------|--------------|---------|
| 1      | 6.403         | VV   | 0.4774      | 2841.07349   | 86.46140     | 26.1525 |
| 2      | 7.194         | VB   | 0.6273      | 3164.93726   | 79.70119     | 29.1337 |
| 3      | 17.071        | BB   | 1.2244      | 2553.69043   | 28.36269     | 23.5071 |
| 4      | 32.120        | BB   | 1.8759      | 2303.77930   | 14.38915     | 21.2066 |

Enantioselective

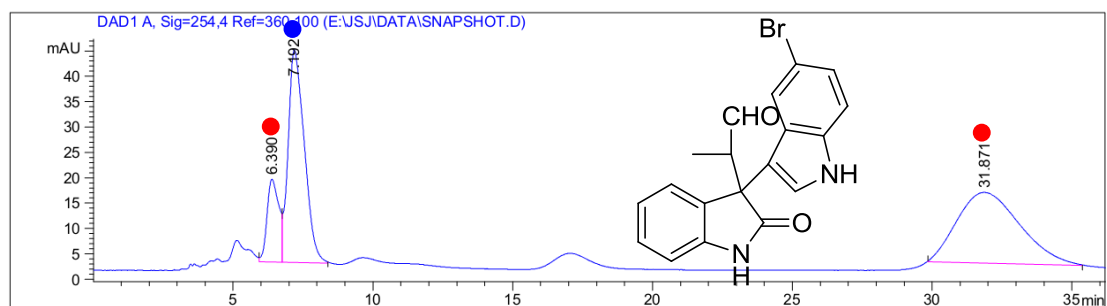

| Peak # | RetTime [min] | Type | Width [min] | Area [mAU*s] | Height [mAU] | Area %  |
|--------|---------------|------|-------------|--------------|--------------|---------|
| 1      | 6.390         | BV   | 0.4347      | 485.67856    | 16.34447     | 11.1612 |
| 2      | 7.192         | VB   | 0.6474      | 1685.37207   | 41.88871     | 38.7307 |
| 3      | 31.871        | BB   | 1.8292      | 2180.45898   | 13.93723     | 50.1081 |

Electronic Supplementary Material (ESI) for Organic & Biomolecular Chemistry  
This journal is © The Royal Society of Chemistry 2012

## 2-(3-(5-bromo-1*H*-indol-3-yl)-2-oxoindolin-3-yl)butanal(3dc)

### Racemic

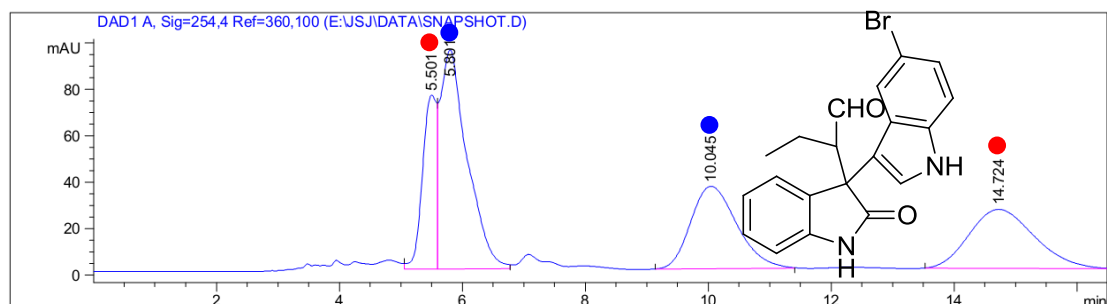

| Peak # | RetTime [min] | Type | Width [min] | Area [mAU*s] | Height [mAU] | Area %  |
|--------|---------------|------|-------------|--------------|--------------|---------|
| 1      | 5.501         | VV   | 0.2458      | 1193.26990   | 74.92126     | 15.3121 |
| 2      | 5.801         | VB   | 0.4227      | 2866.90039   | 94.29029     | 36.7881 |
| 3      | 10.045        | BB   | 0.7981      | 1860.86987   | 35.58725     | 23.8787 |
| 4      | 14.724        | BBA  | 1.0880      | 1871.96680   | 25.39402     | 24.0211 |

### Enantioselective

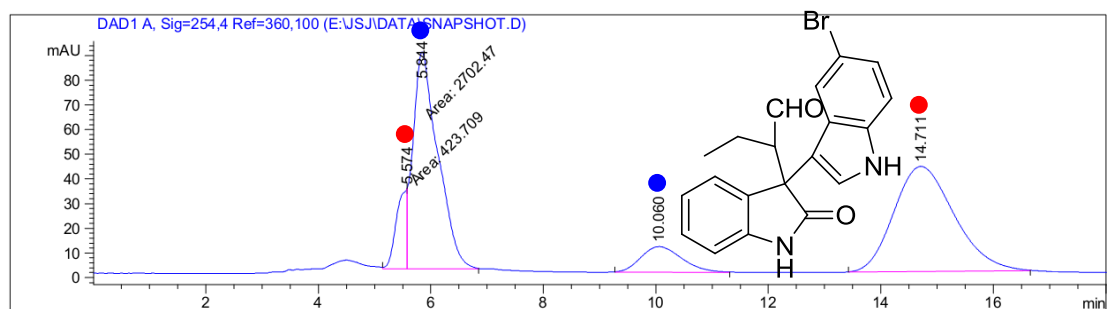

| Peak # | RetTime [min] | Type | Width [min] | Area [mAU*s] | Height [mAU] | Area %  |
|--------|---------------|------|-------------|--------------|--------------|---------|
| 1      | 5.574         | MF   | 0.2183      | 423.70932    | 32.34864     | 6.1984  |
| 2      | 5.844         | FM   | 0.5126      | 2702.46899   | 87.86944     | 39.5340 |
| 3      | 10.060        | BB   | 0.7638      | 520.89740    | 10.30342     | 7.6201  |
| 4      | 14.711        | BB   | 1.1403      | 3188.73047   | 42.64588     | 46.6475 |

Electronic Supplementary Material (ESI) for Organic & Biomolecular Chemistry  
This journal is © The Royal Society of Chemistry 2012

## 2-(3-(7-methyl-1*H*-indol-3-yl)-2-oxoindolin-3-yl)propanal(3eb)

### Racemic

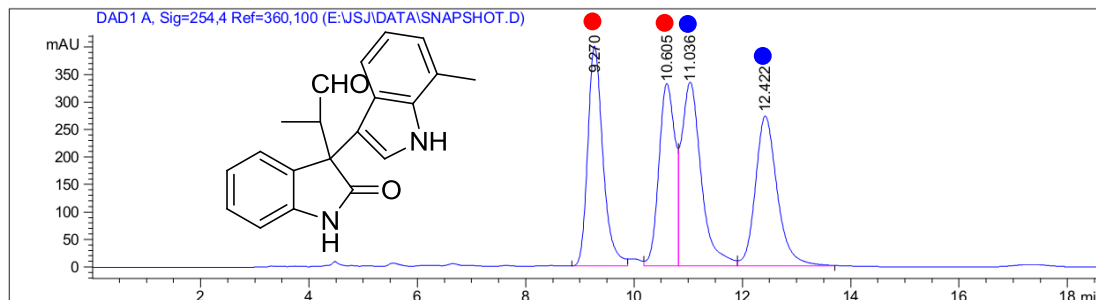

| Peak # | RetTime [min] | Type | Width [min] | Area [mAU*s] | Height [mAU] | Area %  |
|--------|---------------|------|-------------|--------------|--------------|---------|
| 1      | 9.270         | BV   | 0.2977      | 7808.24365   | 400.10464    | 25.3859 |
| 2      | 10.605        | VV   | 0.3120      | 6823.58105   | 331.71347    | 22.1846 |
| 3      | 11.036        | VV   | 0.3738      | 8478.53613   | 334.36444    | 27.5651 |
| 4      | 12.422        | VB   | 0.4254      | 7647.81494   | 272.49286    | 24.8643 |

### Enantioselective

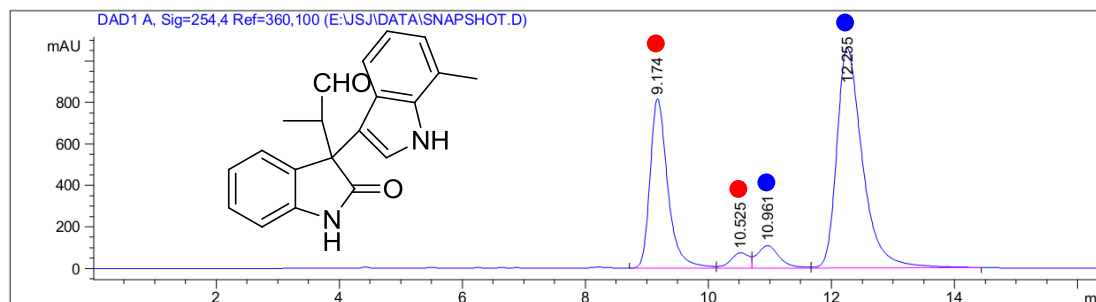

| Peak # | RetTime [min] | Type | Width [min] | Area [mAU*s] | Height [mAU] | Area %  |
|--------|---------------|------|-------------|--------------|--------------|---------|
| 1      | 9.174         | VV   | 0.3035      | 1.63609e4    | 817.30713    | 31.7989 |
| 2      | 10.525        | VV   | 0.3094      | 1522.50012   | 74.20801     | 2.9591  |
| 3      | 10.961        | VV   | 0.3716      | 2703.98779   | 108.19880    | 5.2554  |
| 4      | 12.255        | VB   | 0.4391      | 3.08639e4    | 1061.90686   | 59.9866 |



Electronic Supplementary Material (ESI) for Organic & Biomolecular Chemistry  
This journal is © The Royal Society of Chemistry 2012

## 2-(3-(7-methyl-1*H*-indol-3-yl)-2-oxindolin-3-yl)butanal(3ec)

### Racemic

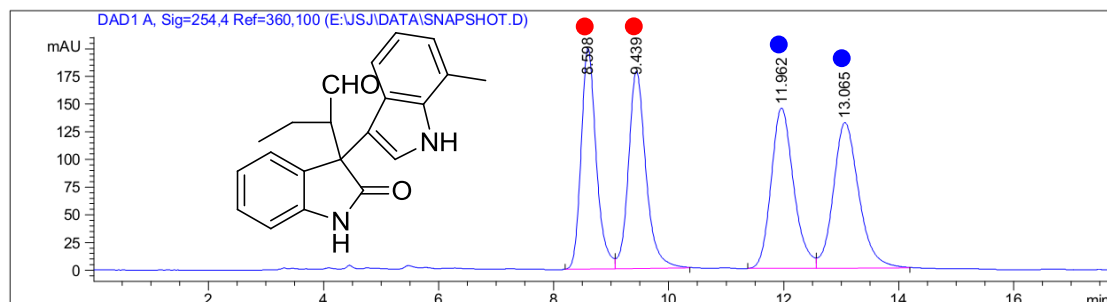

| Peak # | RetTime [min] | Type | Width [min] | Area [mAU*s] | Height [mAU] | Area %  |
|--------|---------------|------|-------------|--------------|--------------|---------|
| 1      | 8.598         | BV   | 0.2790      | 3643.62891   | 199.52719    | 23.6378 |
| 2      | 9.439         | VB   | 0.3207      | 3771.97095   | 178.34866    | 24.4704 |
| 3      | 11.962        | BV   | 0.4171      | 3937.94849   | 144.86671    | 25.5471 |
| 4      | 13.065        | VB   | 0.4703      | 4060.89136   | 131.49629    | 26.3447 |

### Enantioselective

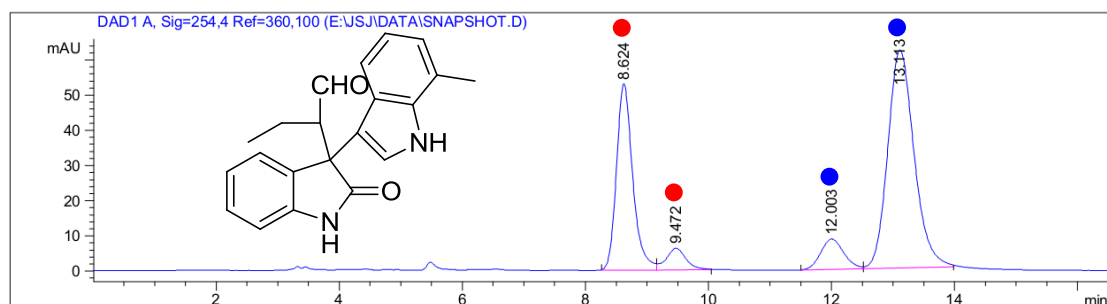

| Peak # | RetTime [min] | Type | Width [min] | Area [mAU*s] | Height [mAU] | Area %  |
|--------|---------------|------|-------------|--------------|--------------|---------|
| 1      | 8.624         | BB   | 0.2781      | 971.56793    | 52.93105     | 30.5697 |
| 2      | 9.472         | BB   | 0.3324      | 138.11148    | 6.14095      | 4.3456  |
| 3      | 12.003        | BV   | 0.4015      | 224.76300    | 8.58345      | 7.0720  |
| 4      | 13.113        | VB   | 0.4573      | 1843.76648   | 61.92967     | 58.0128 |

Electronic Supplementary Material (ESI) for Organic & Biomolecular Chemistry  
This journal is © The Royal Society of Chemistry 2012

## 2-(3-(7-methyl-1*H*-indol-3-yl)-2-oxindolin-3-yl)-3-phenylpropanal(3ed)

### Racemic

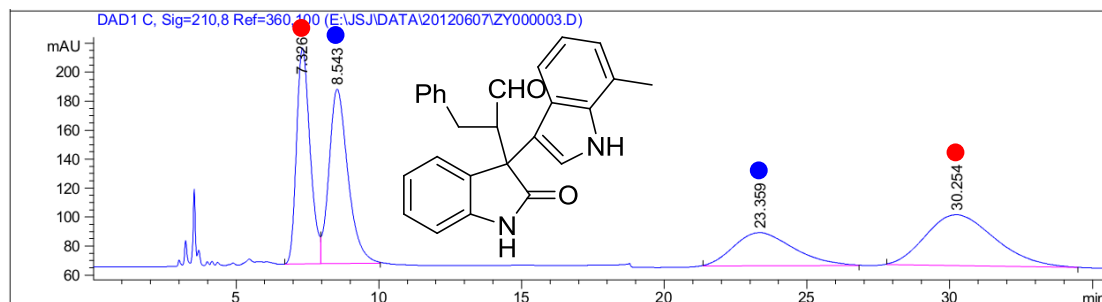

| Peak # | RetTime [min] | Type | Width [min] | Area [mAU*s] | Height [mAU] | Area %  |
|--------|---------------|------|-------------|--------------|--------------|---------|
| 1      | 7.326         | BV   | 0.5096      | 4925.51270   | 149.01814    | 24.9446 |
| 2      | 8.543         | VB   | 0.7039      | 5575.89600   | 120.48984    | 28.2384 |
| 3      | 23.359        | BB   | 1.7025      | 3301.57007   | 22.78568     | 16.7204 |
| 4      | 30.254        | BB   | 2.0165      | 5942.82324   | 35.15039     | 30.0966 |

### Enantioselective

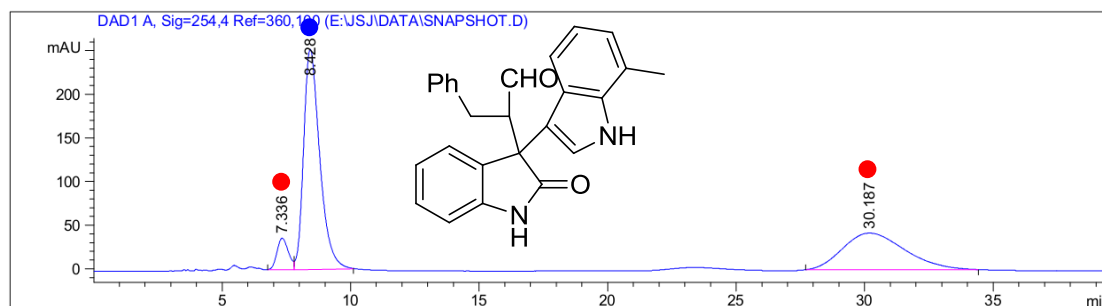

| Peak # | RetTime [min] | Type | Width [min] | Area [mAU*s] | Height [mAU] | Area %  |
|--------|---------------|------|-------------|--------------|--------------|---------|
| 1      | 7.336         | BV   | 0.4771      | 1110.44458   | 36.07802     | 5.7670  |
| 2      | 8.428         | VB   | 0.6676      | 1.10216e4    | 252.30403    | 57.2397 |
| 3      | 30.187        | BB   | 1.9998      | 7123.10498   | 42.10324     | 36.9933 |

Electronic Supplementary Material (ESI) for Organic & Biomolecular Chemistry  
This journal is © The Royal Society of Chemistry 2012

## 2-(3-(1*H*-indol-3-yl)-1-methyl-2-oxindolin-3-yl)propanal(3fb)

### Racemic

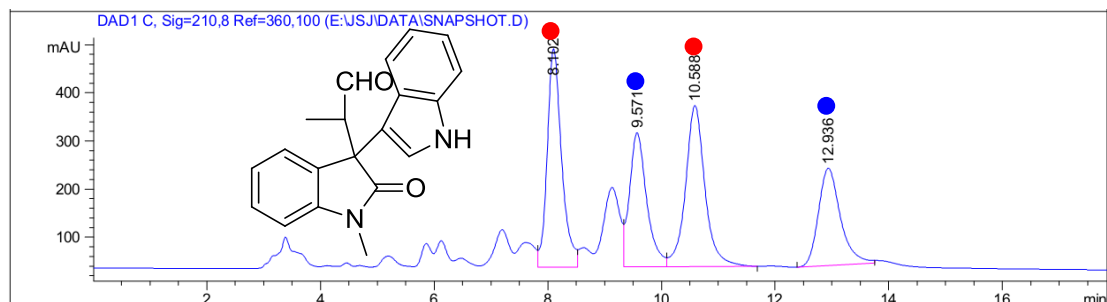

| Peak # | RetTime [min] | Type | Width [min] | Area [mAU*s] | Height [mAU] | Area %  |
|--------|---------------|------|-------------|--------------|--------------|---------|
| 1      | 8.102         | VV   | 0.2633      | 7988.43848   | 453.87119    | 29.2362 |
| 2      | 9.571         | VV   | 0.3125      | 5883.58643   | 278.45645    | 21.5328 |
| 3      | 10.588        | VB   | 0.3542      | 7980.89355   | 334.70029    | 29.2086 |
| 4      | 12.936        | BB   | 0.4114      | 5470.86279   | 202.39256    | 20.0223 |

### Enantioselective

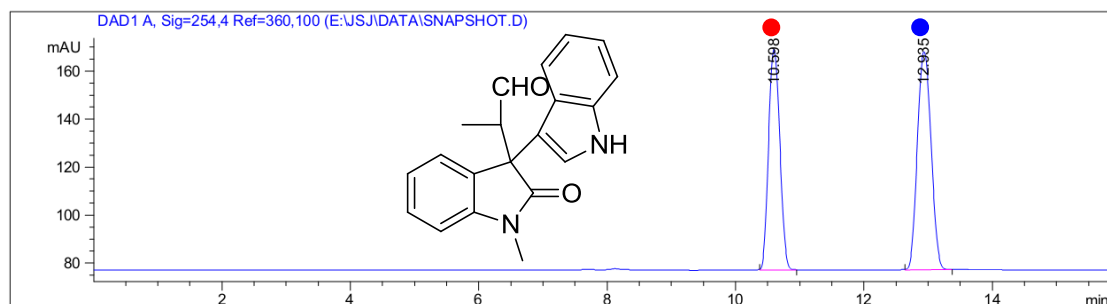

| Peak # | RetTime [min] | Type | Width [min] | Area [mAU*s] | Height [mAU] | Area %  |
|--------|---------------|------|-------------|--------------|--------------|---------|
| 1      | 10.598        | BB   | 0.1940      | 1120.25793   | 92.05593     | 45.3765 |
| 2      | 12.935        | BB   | 0.2391      | 1348.54980   | 90.87155     | 54.6235 |

Electronic Supplementary Material (ESI) for Organic & Biomolecular Chemistry  
This journal is © The Royal Society of Chemistry 2012

### 3-(1*H*-indol-3-yl)-1-methyl-3-(3-oxobutan-2-yl)indolin-2-one(*syn*-4fb)

Enantioselective

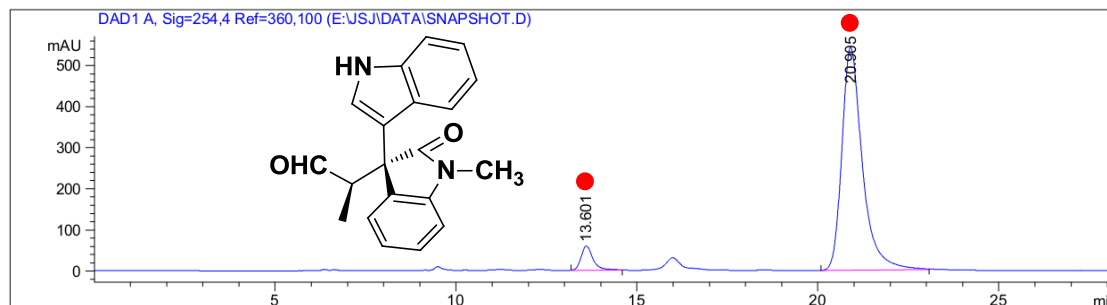

| Peak # | RetTime [min] | Type | Width [min] | Area [mAU*s] | Height [mAU] | Area %  |
|--------|---------------|------|-------------|--------------|--------------|---------|
| 1      | 13.601        | BB   | 0.3445      | 1369.16467   | 59.48820     | 6.0215  |
| 2      | 20.905        | BB   | 0.5936      | 2.13687e4    | 542.46240    | 93.9785 |

### 2-(3-(1*H*-indol-3-yl)-2-oxoindolin-3-yl)-2-phenylacetaldehyde(3ae)

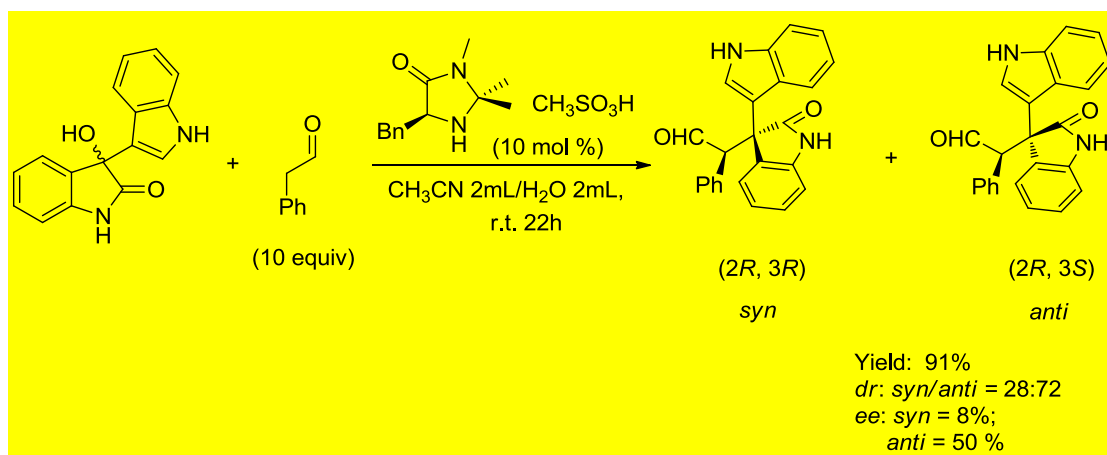

Racemic

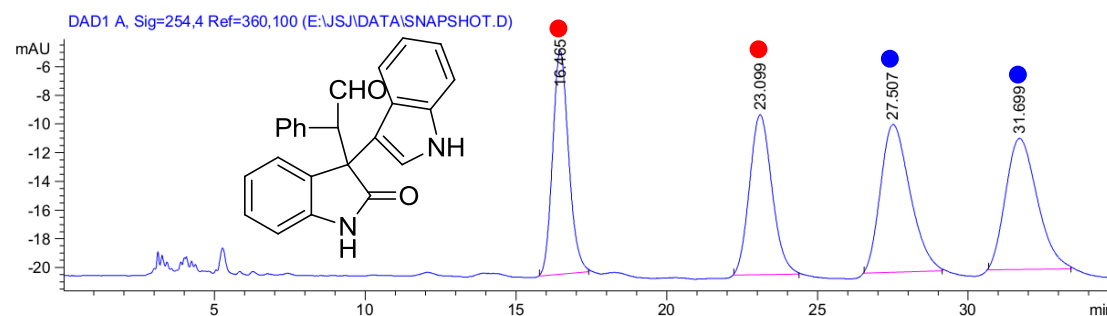

Electronic Supplementary Material (ESI) for Organic & Biomolecular Chemistry  
This journal is © The Royal Society of Chemistry 2012

| Peak # | RetTime [min] | Type | Width [min] | Area [mAU*s] | Height [mAU] | Area %  |
|--------|---------------|------|-------------|--------------|--------------|---------|
| 1      | 16.465        | BB   | 0.5643      | 574.97797    | 15.58911     | 22.8030 |
| 2      | 23.099        | BB   | 0.7812      | 578.42609    | 11.15117     | 22.9398 |
| 3      | 27.507        | BB   | 0.9722      | 703.37244    | 10.30625     | 27.8950 |
| 4      | 31.699        | BB   | 0.9924      | 664.72174    | 9.11889      | 26.3622 |

**Enantioselective**

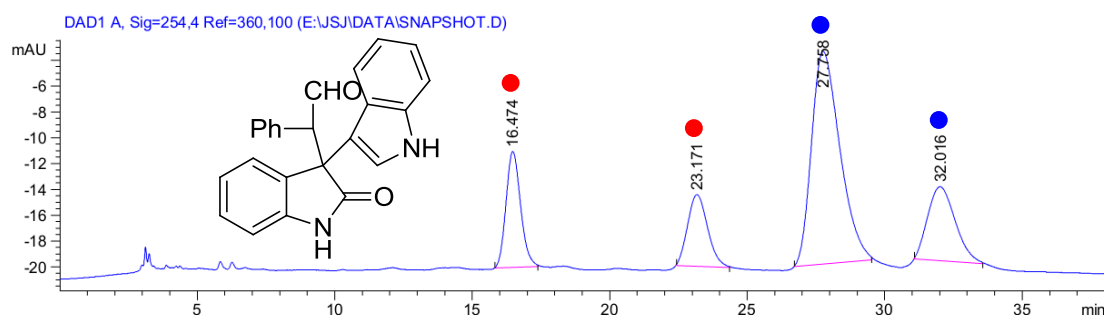

| Peak # | RetTime [min] | Type | Width [min] | Area [mAU*s] | Height [mAU] | Area %  |
|--------|---------------|------|-------------|--------------|--------------|---------|
| 1      | 16.474        | BB   | 0.5573      | 329.42371    | 8.95315      | 15.0633 |
| 2      | 23.171        | BB   | 0.7163      | 278.20529    | 5.53617      | 12.7213 |
| 3      | 27.758        | BB   | 1.0114      | 1181.31470   | 16.45876     | 54.0171 |
| 4      | 32.016        | BB   | 0.8355      | 397.98206    | 5.72157      | 18.1982 |
